# Supplementary material for: Quality of reporting of pilot and feasibility cluster randomised trials: a systematic review
Source: PubMed Central journal article supplement — BMJ Open. 2017 Nov 8;7(11):e016970. doi: 10.1136/bmjopen-2017-016970 (PMC5695336; doi:10.1136/bmjopen-2017-016970), 2017-11-08
Supplement: bmjopen-2017-016970.draft_revisions.pdf [file bmjopen-2017-016970.draft_revisions.pdf]

# BMJ Open

BMJ Open is committed to open peer review. As part of this commitment we make the peer review history of every article we publish publicly available.

When an article is published we post the peer reviewers' comments and the authors' responses online. We also post the versions of the paper that were used during peer review. These are the versions that the peer review comments apply to.

The versions of the paper that follow are the versions that were submitted during the peer review process. They are not the versions of record or the final published versions. They should not be cited or distributed as the published version of this manuscript.

BMJ Open is an open access journal and the full, final, typeset and author-corrected version of record of the manuscript is available on our site with no access controls, subscription charges or pay-per-view fees (<http://bmjopen.bmj.com>).

If you have any questions on BMJ Open's open peer review process please email [editorial.bmjopen@bmj.com](mailto:editorial.bmjopen@bmj.com)

# BMJ Open

## The Quality of Reporting of Pilot and Feasibility Cluster Randomised Trials: A Systematic Review

|                                 |                                                                                                                                                                                                                              |
|---------------------------------|------------------------------------------------------------------------------------------------------------------------------------------------------------------------------------------------------------------------------|
| Journal:                        | <i>BMJ Open</i>                                                                                                                                                                                                              |
| Manuscript ID                   | bmjopen-2017-016970                                                                                                                                                                                                          |
| Article Type:                   | Research                                                                                                                                                                                                                     |
| Date Submitted by the Author:   | 23-Mar-2017                                                                                                                                                                                                                  |
| Complete List of Authors:       | Chan, CL; Barts & The London School of Medicine and Dentistry, Leyrat, Clémence; London School of Hygiene and Tropical Medicine Eldridge, Sandra; Queen Mary University of London, Centre for Primary Care and Public Health |
| <b>Primary Subject Heading</b>: | Research methods                                                                                                                                                                                                             |
| Secondary Subject Heading:      | Medical publishing and peer review                                                                                                                                                                                           |
| Keywords:                       | PRIMARY CARE, STATISTICS & RESEARCH METHODS, EDUCATION & TRAINING (see Medical Education & Training)                                                                                                                         |
|                                 |                                                                                                                                                                                                                              |

SCHOLARONE™  
Manuscripts

Peer review only

# The Quality of Reporting of Pilot and Feasibility Cluster Randomised Trials: A Systematic Review

Claire L Chan, Statistician <sup>1\*</sup>, Clémence Leyrat, Research Fellow in Statistics <sup>2</sup>, Sandra M Eldridge, Professor <sup>1</sup>

1 Centre for Primary Care and Public Health, Queen Mary University of London, London, UK, E1 2AB

2 Department of Medical Statistics, London School of Hygiene and Tropical Medicine, London, UK, WC1E 7HT

Corresponding author\*

Email: [c.l.chan@qmul.ac.uk](mailto:c.l.chan@qmul.ac.uk)

## ABSTRACT

**Background:** There are an increasing number of studies described as pilot and feasibility studies. Reporting is generally poor. These studies are particularly important when designing cluster randomised trials (CRTs).

**Objectives:** To systematically review the quality of reporting of pilot and feasibility CRTs. In particular, to assess (1) the number of pilot CRTs conducted between 01/01/2011 and 31/12/2014, (2) whether objectives and methods are appropriate and (3) reporting quality.

**Methods:** We searched PubMed (2011-2014) for CRTs with 'pilot' or 'feasibility' in the title or abstract; that were assessing some element of feasibility; and showing evidence the study was in preparation for a main effectiveness/efficacy trial. Quality assessment criteria were based on the Consolidated Standards of Reporting Trials (CONSORT) extensions for pilot trials and CRTs.

**Results:** Eighteen pilot CRTs were identified. Forty-four percent did not have feasibility as their primary objective, and many (50%) performed formal hypothesis testing for effectiveness/efficacy despite being underpowered. Most (83%) included 'pilot' or 'feasibility' in the title, and discussed implications for progression from the pilot to the future definitive trial (89%), but fewer reported reasons for the randomised pilot trial (39%), sample size rationale (44%), or progression criteria (17%). Most defined the cluster (100%), and number of clusters randomised (94%), but few reported

1  
2  
3 how the cluster design affected sample size (17%), whether consent was sought from clusters (11%),  
4 or who enrolled clusters (17%).  
5  
6  
7

8 **Conclusions:** That only 18 pilot CRTs were identified necessitates increased awareness of the  
9 importance of conducting and publishing pilot CRTs and improved reporting. Pilot CRTs should  
10 primarily be assessing feasibility, avoiding formal hypothesis testing for effectiveness/efficacy, and  
11 reporting reasons for the pilot, sample size rationale, and progression criteria, as well as enrolment  
12 of clusters, and how the cluster design affects design aspects. We recommend adherence to the  
13 CONSORT extensions for pilot trials and CRTs.  
14  
15  
16  
17  
18

#### 19 **Article summary**

##### 20 **Strengths and limitations of this study**

- 21 • We used a robust search and data extraction procedure, including validation of the  
22 screening/sifting process and double data extraction.
- 23 • We may have missed some studies, since our criteria excluded studies not including 'pilot'  
24 or 'feasibility' in the title or abstract, and those not clearly in preparation for a main trial.  
25  
26  
27  
28  
29  
30  
31  
32  
33  
34

#### 35 **BACKGROUND**

36  
37  
38  
39 In a cluster randomised trial (CRT) clusters, rather than individuals, are the units of randomisation. A  
40 cluster is a group (usually predefined) of one or more individuals. For example, clusters could be  
41 hospitals and the individuals, the patients within those hospitals. CRTs are often chosen for logistical  
42 reasons, prevention of contamination across individuals, or because the intervention is targeted at  
43 the cluster level. CRTs are useful for evaluating complex interventions. However, they have added  
44 complexity in terms of design, implementation, and analysis and so it is important to ensure that  
45 carrying out a CRT is feasible before conducting the future definitive trial.[1]  
46  
47  
48  
49  
50

51  
52 A feasibility study conducted in advance of a future definitive trial is a study designed to answer the  
53 question about whether the study can be done and whether one should proceed with it. A pilot  
54 study answers the same question but in such a study part or all of the future trial is carried out on a  
55 smaller scale.[2] Thus all pilot studies are also feasibility studies. Pilot studies can be randomised or  
56  
57  
58  
59  
60

1  
2  
3 non-randomised; for brevity we use the term pilot CRT throughout this paper to refer to a  
4 randomised study with a clustered design that is in preparation for a future definitive trial assessing  
5 effectiveness/efficacy.[3, 4] The focus of pilot trials is on investigating areas of uncertainty about the  
6 future definitive trial to see whether it is feasible to carry out, so the data, methods, and analysis are  
7 different from an effectiveness/efficacy trial. In particular, more data might be collected on items  
8 such as recruitment and retention to assess feasibility, methods may include specifying criteria to  
9 judge whether to proceed with the future definitive trial, and analysis is likely to be based on  
10 descriptive statistics since the study is not powered for formal hypothesis testing for  
11 effectiveness/efficacy.  
12

13  
14  
15  
16  
17  
18  
19 Arnold et al. highlight the importance of pilot studies being of high quality.[5] Good reporting quality  
20 is essential to show how the pilot has informed the future definitive trial as well as to allow readers  
21 to use the results in preparing for similar future trials. The number of pilot and feasibility studies in  
22 the literature is increasing. However, Arain et al. indicate that reporting of pilot studies is poor.[6]  
23 There are no previous reviews of the reporting quality of pilot CRTs, despite the extra complications  
24 arising from the clustered structure. The aim of this review is to reveal the quality of reporting of  
25 pilot CRTs published between 01/01/2011 and 31/12/2014. We extracted information to describe  
26 the sample of pilot CRTS and to assess quality, with quality criteria based on the Consolidated  
27 Standards of Reporting Trials (CONSORT) extension for CRTs,[7] and a CONSORT extension for pilot  
28 trials which SE and CC were involved in the final stages of development of during this review.[3, 4]  
29 We present recommendations for improving the conduct, analysis and reporting of these studies  
30 and expect this to improve the quality, usefulness and interpretation of pilot CRTs in the future. We  
31 know current reporting of CRTs is suboptimal,[8-11] and thus we expected the reporting of pilot  
32 CRTs to be even poorer.  
33  
34  
35  
36  
37  
38  
39  
40  
41  
42

43 The questions addressed by this review are:

- 44 1) How many pilot CRTs have been conducted between 01/01/2011 and 31/12/2014?
  - 45 2) Are pilot CRTs using appropriate objectives and methods?
  - 46 3) To what extent is the quality of reporting of pilot CRTs sufficient?
- 47  
48  
49  
50

## 51 **METHODS**

### 52 **Inclusion and exclusion criteria**

53  
54  
55  
56  
57  
58  
59  
60

1  
2  
3 We included papers published in English with a publication date (print or electronic) between  
4 01/01/2011 and 31/12/2014. These dates were chosen to ensure we identified recent papers, with  
5 the start date being after the updated CONSORT 2010 was published.[12] The study had to be a CRT,  
6 have the word 'pilot' or 'feasibility' in the title or abstract, be assessing some element of feasibility,  
7 and show evidence that the study was in preparation for a trial assessing effectiveness/efficacy.  
8 Regardless of how authors described a study, we did not consider it to be a pilot trial if it was *only*  
9 looking at effectiveness/efficacy because we wanted to exclude those studies that claim to be a  
10 pilot/feasibility trial simply as justification for small sample size.[13] The paper had to be reporting  
11 results (i.e. not a protocol or statistical analysis plan) and had to be the first published paper  
12 reporting pilot outcomes (i.e. not an extension/follow-up study for a pilot study already reported,  
13 and not a second paper reporting further pilot outcomes). Interim analyses, analyses before the  
14 study was complete, and internal pilots were excluded; the CONSORT extension for pilot trials on  
15 which we based the quality assessment does not apply to internal pilots.[3, 4] No studies were  
16 excluded on the basis of quality since the aim was to assess the quality of reporting.  
17  
18  
19  
20  
21  
22  
23  
24  
25  
26

#### 27 **Data sources and search methods**

28 We searched PubMed for relevant papers in September 2015. We searched for the words 'pilot' or  
29 'feasibility' in the title or abstract, a search strategy similar to that used by Lancaster et al. [14] We  
30 combined this with a search strategy to identify CRTs; this was similar to the strategy used by Diaz-  
31 Ordaz et al. [8] The full electronic search strategy is given in Appendix 1.  
32  
33  
34  
35  
36

#### 37 **Sifting and validation**

38 The titles and abstracts of all papers identified by the electronic search were screened by CC for  
39 possible inclusion. Full texts were obtained for those papers identified as definitely or possibly  
40 satisfying the inclusion criteria and sifted by CC for inclusion. As validation, CL carried out the same  
41 screening and sifting process independently on a 10% random sample of electronically identified  
42 papers. For full texts where there was uncertainty whether the paper should be included, it was  
43 referred to SE for a final decision.  
44  
45  
46  
47  
48  
49

#### 50 **Refining the inclusion process**

51 We refined the screening and sifting process following piloting. In particular we rejected a more  
52 restrictive PubMed search that required 'pilot' or 'feasibility' in the title rather than allowing these  
53 words to occur in the title *or* abstract because this missed relevant papers; we altered the order of  
54 the exclusion criteria to make the process more streamline; and we relaxed one inclusion criteria,  
55  
56  
57  
58  
59  
60

1  
2  
3 requiring evidence that the pilot trial was in preparation for a future definitive trial rather than an  
4 explicit statement that authors were planning a future definitive trial. The protocol was updated,  
5 and is available from the corresponding author.  
6  
7  
8

### 9 **Data Extraction**

10 CC and CL independently extracted data from all papers selected for inclusion in the review. Written  
11 guidance was used, and extracted data were recorded in an Excel spreadsheet. Discrepancies were  
12 resolved by discussion between CC and CL, and where agreement could not be reached a final  
13 decision was made by SE.  
14  
15  
16  
17

18  
19 For each pilot CRT included in the review, we extracted information to describe the trials, including  
20 publication date (print date unless there was an earlier electronic date), country in which the trial  
21 was set, number of clusters randomised, method of cluster randomisation and, following the  
22 CONSORT extension for pilot trials' recommendation to focus on objectives rather than outcomes,  
23 the primary objective. We defined the primary objective using method similar to that used by Diaz-  
24 Ordaz *et al.*[8] for primary outcomes i.e. as that specified by the author, else the objective used in  
25 the sample size justification, or else the first objective mentioned in the abstract or else main text.  
26  
27  
28  
29  
30  
31

32 To assess whether the pilot trials were using appropriate objectives and methods, we collected  
33 information on whether the primary objective was about feasibility, the method used to address the  
34 main feasibility objective, the rationale for numbers in the pilot trial, and whether there was formal  
35 hypothesis testing for, or statements about, effectiveness/efficacy without a caveat about the small  
36 sample size.  
37  
38  
39  
40  
41

42 To assess reporting quality, we created a list of items based on the CONSORT extension for pilot  
43 trials,[3, 4] and the CONSORT extension for CRTs.[7] We recognised the need to balance  
44 comprehensiveness and feasibility.[11] Therefore, where there was no real change between the  
45 CONSORT 2010 for randomised controlled trials (RCTs),[12] and either of the CONSORT  
46 extensions,[3, 4, 7] and we expected the item would be generally well-reported, the item was not  
47 extracted (e.g. structured summary of trial design, methods, results, and conclusions). Moreover,  
48 where items referred to objectives or methods, we extracted this for the primary objective only.  
49 Where a CRT item became less relevant in the context of a pilot trial, we did not extract it (e.g.  
50 whether variation in cluster sizes was formally considered in the sample size calculation). In addition,  
51 where there was a substantial difference between the item for either the CONSORT 2010 for RCTs or  
52  
53  
54  
55  
56  
57  
58  
59  
60

1  
2  
3 the CRT extension and that for the pilot trial extension and the items were not compatible, we used  
4 the latter item (e.g. focusing on objectives rather than outcomes). The final version of the full list of  
5 data extracted, and further information on each item extracted, is included in Appendix 2.  
6  
7  
8

### 9 10 **Refining data extraction**

11 Initially CC extracted data on a random 10% sample of papers. However, some of the items, in  
12 particular some of the CRT-specific items such as whether the intervention or allocation  
13 concealment were at the individual level, cluster level, or both, were difficult to extract in a clear,  
14 standardised way, as similarly noted by Ivers et al,[11] so these items were removed. Furthermore,  
15 some items were deemed easier to extract if split into two items, for example; 'reported why the  
16 pilot trial ended/stopped' which we subsequently split into 'reported the pilot trial ended/stopped'  
17 and 'if so, what was the reason'.  
18  
19  
20  
21  
22

### 23 24 **Analysis**

25  
26  
27 Data were analysed using Excel version 2013. We describe the characteristics of the pilot CRTs using  
28 descriptive statistics. Where we extracted text, we established categories during analysis by  
29 grouping similar data, for example grouping the different primary objectives. To assess adherence to  
30 the CONSORT checklists, we present the number and percentage reporting each item. This report  
31 adheres, where appropriate, to the Preferred Reporting Items for Systematic reviews and Meta-  
32 Analyses (PRISMA) statement.[15]  
33  
34  
35  
36  
37

### 38 39 **Patient involvement**

40  
41  
42 No patients were involved in the development of the research question, design or conduct of the  
43 study, interpretation or reporting. No patients were recruited for this study. There are no plans to  
44 disseminate results of the research to study participants.  
45  
46  
47

## 48 49 **RESULTS**

50  
51  
52 The electronic PubMed search identified 257 published papers. We rejected 108 during screening  
53 (29 not reporting results; 32 not about a single randomised trial; 46 not cluster randomised; 1  
54 interim analysis). The remaining 149 full-text articles were assessed for eligibility, and 131 more  
55 papers were rejected (1 not reporting results; 13 not about a single randomised trial; 25 not cluster  
56  
57  
58  
59  
60



1  
2  
3 randomised; 8 analyses before study complete/internal pilot; 32 not assessing feasibility; 50 not in  
4 preparation for a future definitive effectiveness/efficacy trial; 2 not the first published paper  
5 reporting pilot outcomes). This left 18 studies to be included in the analysis.[A1-A18]. The full list of  
6 studies is included in Appendix 3. Figure 1 shows the flow diagram of the identification process for  
7 the sample of 18 pilot CRTs.  
8  
9  
10

11  
12  
13 There was 96% agreement between CC and CL for the 10% random sample used for the screening  
14 and sifting validation (based on 26 papers), with a kappa coefficient of 0.84.  
15  
16

### 17 **Trial characteristics**

18  
19 In general, the more recent the publication date, the more pilot CRTs were identified, but with the  
20 most identified in 2013 (Table 2). Of the 18 included studies, the majority (56%) were set in the UK.  
21 All other countries were represented only once except for Canada (3 trials) and USA (2 trials). Of  
22 those reporting the method of randomisation, the majority (69%) used stratified with blocked  
23 randomisation. The median number of clusters randomised was 8 (IQR: 4 to 16) with a range from 2  
24 to 50.  
25  
26  
27  
28  
29

### 30 **Pilot trial objectives and methods**

31  
32 Ten (56%) of the 18 included pilot trials had feasibility as their primary objective, for example  
33 assessing feasibility of implementing the intervention (6 trials), of recruitment and retention (3  
34 trials), and of the cluster design (1 trial) (Table 3). All ten trials reported a corresponding measure to  
35 assess the feasibility objective; most (90%) used descriptive statistics and/or qualitative methods to  
36 address the objective. In one trial a statistical test was used to address their primary feasibility  
37 objective without the authors designing the study to be adequately powered to do so.  
38  
39  
40  
41  
42

43  
44 The remaining eight trials had an effectiveness/efficacy primary objective, and used statistical tests  
45 to address this. Nevertheless these eight trials all had feasibility as one of their other objectives (this  
46 was an inclusion criterion). The feasibility objectives were similar to those where the feasibility was  
47 primary, but expressed more generally in two trials, for example, looking at the feasibility of the  
48 future definitive trial,[A16] and looking at whether the future definitive trial could answer the  
49 effectiveness question and which study design would enable this.[A10] In only three trials was a  
50 measure to assess the feasibility objective reported, using either quantitative or qualitative  
51 measures.  
52  
53  
54  
55  
56  
57  
58  
59  
60

1  
2  
3 All eight trials that reported a rationale for the numbers in the pilot trial followed best practice in  
4 not basing this rationale on a formal sample size calculation for effectiveness/efficacy. In the nine  
5 (50%) trials where formal hypothesis testing was reported (the one trial using a statistical test for the  
6 feasibility primary objective and the eight trials using statistical tests for the non-feasibility primary  
7 objectives), four of the conclusions about effectiveness/efficacy were made without any caveats  
8 about the imprecision of estimates or possible lack of representativeness because of the small  
9 samples.  
10  
11  
12  
13

### 14 15 16 **Quality of reporting**

17 To present data on quality of reporting we grouped reporting items into three categories (Table 4):  
18 (1) new items added to the CONSORT extension for pilot trials, (2) items in the CONSORT extension  
19 for pilot trials that were substantially adapted from CONSORT 2010 for RCTs and (3) items in the  
20 CONSORT extension for pilot trials that were the same as or with only minor differences from  
21 CONSORT 2010 for RCTs plus items in the CONSORT extension for CRTs.[3, 4, 7, 12]  
22  
23  
24  
25  
26

#### 27 **New items**

28  
29  
30 Five new items were added to the CONSORT extension for pilot trials on the identification and  
31 consent process, progression criteria, other unintended consequences, implications for progression,  
32 and ethical approval.[3, 4] In our review, how participants were identified and consented was  
33 reported by 50% and 76% of the pilot CRTs, respectively, but how clusters were identified and  
34 consented was reported by just 33% and 11%, respectively. Only 3 trials (17%) reported criteria used  
35 to judge whether or how to proceed with the future definitive trial, with two giving numbers that  
36 must be exceeded such as recruitment, retention, attendance, and data collection percentages,[A17,  
37 A2] and one giving categories of “definitely feasible”, “possibly feasible”, and “not feasible”. [A12]  
38 The item on other unintended consequences was reported by none of the pilot CRTs, although it is  
39 unclear whether this is due to poor reporting or because no unintended consequences occurred.  
40 Implications for progression from pilot to future definitive trial was reported by 16 trials (89%), with  
41 nine reporting to proceed/proceed with changes, five reporting further research or piloting is  
42 needed first, and two reporting to not go ahead with the future definitive trial. 94% reported ethical  
43 approval/research review committee approval, but only 47% of them also reported the  
44 corresponding reference number.  
45  
46  
47  
48  
49  
50  
51  
52  
53  
54

#### 55 **Substantially adapted items**

1  
2  
3  
4  
5 Six items in the CONSORT extension for pilot trials were substantially adapted from CONSORT 2010  
6 for RCTs, regarding reasons for the randomised pilot trial, sample size rationale, numbers  
7 approached and/or assessed for eligibility, remaining uncertainty about feasibility, generalisability of  
8 pilot trial methods and findings, and where the pilot trial protocol can be accessed.[3, 4] Reasons for  
9 the randomised pilot trial were reported by 39% of the pilot CRTs. Eight trials (44%) gave a rationale  
10 for the sample size of the pilot trial, based on logistics,[A15] resources,[A14] time,[A16] a balance of  
11 practicalities and need for reasonable precision,[A18] a general statement that it was considered  
12 sufficient to address the objectives of the pilot trial,[A17] formal [A6] and non-formal [A7]  
13 calculation to enable estimation of parameters in the future definitive trial, and a formal calculation  
14 based on the primary feasibility outcome.[A12] The number of individuals approached and/or  
15 assessed for eligibility was reported by 47%, and the number of clusters by 56%. Remaining  
16 uncertainty was reported by 56% of the pilot CRTs. 89% reported generalisability of pilot trial  
17 methods/findings to the future definitive trial or other studies, but clarity of reporting was lacking as  
18 it was difficult to distinguish between references to the future definitive trial versus other future  
19 studies due to ambiguous phrases such as “in a future trial”. Only 39% reported where the pilot trial  
20 protocol could be accessed.  
21  
22  
23  
24  
25  
26  
27  
28  
29  
30

31  
32 Items essentially taken from CONSORT 2010 for RCTs or the CONSORT extension for CRTs  
33  
34

35 For the remaining items, reporting quality was variable. Some were reported by fewer than 20% of  
36 the pilot CRTs, for example considering the cluster design in the sample size rationale (17%),  
37 reporting whether consent was sought from clusters (11%) and who enrolled them (17%), how  
38 people were blinded (7% of applicable trials), number of excluded individuals (6% of applicable trials)  
39 and clusters (18% of applicable trials) after randomisation, and a table showing baseline cluster  
40 characteristics (11%). Those reported most well, by more than 80% of the pilot CRTs, included  
41 reporting ‘pilot’ or ‘feasibility’ in the title (83%), scientific background and explanation of rationale  
42 for future definitive trial (100%), pilot trial design (100%), nature of the cluster (100%), settings and  
43 locations where the data were collected (100%), whether consent was sought from participants  
44 (94%), number of clusters randomised (94%) and assessed for primary objective (82% of applicable  
45 trials), number of individuals assessed for primary objective (94% of applicable trials), limitations of  
46 pilot trial (94%), and source of funding (100%).  
47  
48  
49  
50  
51  
52  
53  
54

## 55 56 **DISCUSSION** 57 58 59 60

### Main findings

This is the first study to assess the reporting quality of pilot CRTs using the recently developed CONSORT checklist for pilot trials.[3, 4] Our search strategy and inclusion criteria identified 18 pilot CRTs published between 2011 and 2014. Most studies were published in the UK, perhaps driven by the availability of funding or the large number of CRTs and interest in complex interventions in the UK.

With respect to the pilot CRT objectives and methods, a considerable proportion of papers did not have feasibility as their primary objective. Of the trials reporting a sample size rationale, all followed best practice in not carrying out a formal sample size calculation for effectiveness/efficacy, yet a substantial proportion performed formal hypothesis testing for effectiveness/efficacy. This could indicate an inappropriate attachment to hypothesis testing, although many did explain it was an indication of *potential* effectiveness or that the study was underpowered. Investigators wanting to assess effectiveness/efficacy and use statistical tests to do so should be performing a properly powered definitive trial, otherwise there is the potential for misleading conclusions affecting clinical decisions as well as misinformed decisions about the future definitive trial.[16]

Reporting quality of pilot CRTs was variable. Items reported well included reporting the term 'pilot' or 'feasibility' in the title, generalisability of pilot trial methods/findings to the future definitive trial or other studies, and implications for progression from the pilot to the future definitive trial, although clarity could be improved when referring to the future definitive trial rather than other future studies in general. Items least well reported included reasons for the randomised pilot trial, sample size rationale, criteria used to judge whether or how to proceed with the future definitive trial, and where the pilot trial protocol can be accessed. These items are important so that readers can understand whether the uncertainty they are facing about their future trial has already been addressed in a pilot, researchers can make sure they have enough patients to achieve the pilot trial objectives, readers can understand the criteria for progression, and to prevent against selective reporting.

For items related to the cluster aspect of pilot CRTs, most pilot CRTs reported the nature of the cluster, and the number of clusters randomised and assessed for the primary objective. The items reported least well included considering the cluster design during the sample size rationale, reporting who enrolled clusters and how they were consented, number of exclusions for clusters

1  
2  
3 after randomisation, and a table showing baseline cluster characteristics. Moreover, while nearly all  
4 trial reports described whether consent was sought from individuals or not, seeking agreement from  
5 clusters was only described in a small minority. The items on agreement from and enrolment of  
6 clusters, baseline cluster characteristics, and number of excluded clusters are particularly important  
7 to report, since they may affect assessment of feasibility.  
8  
9  
10

11  
12  
13 If we consider why some items may have been well adhered to and others not, it is interesting to  
14 observe that new items added to the CONSORT extension for pilot trials and items substantially  
15 adapted from CONSORT 2010 for RCTs were in general not well adhered to. This could perhaps be  
16 because of somewhat newer ideas that may not have been considered during design such as  
17 specifying progression criteria and considering a rationale for numbers in the pilot. Alternatively,  
18 perhaps there were aspects sometimes done but not reported due to lack of reporting guidance to  
19 remind authors; for example, the new items on how clusters were identified and consented, other  
20 unintended consequences, and ethical approval/research review committee approval reference  
21 number, and the substantially adapted items on reporting reasons for the pilot trial, number of  
22 individuals approached and/or assessed for eligibility, and where the pilot trial protocol can be  
23 accessed. It is also interesting to observe that many of the most poorly reported items concerned  
24 methods/design (progression criteria; enrolment and consent of clusters), and in particular,  
25 justification of design aspects (reasons for randomised pilot trial; sample size rationale including  
26 consideration of cluster design).  
27  
28  
29  
30  
31  
32  
33  
34  
35  
36

### 37 **Comparison with other studies**

38  
39 There has not been a previous review of pilot trials using the new CONSORT extension for these  
40 trials.[3, 4] However, the review by Arain et al. looking at pilot and feasibility studies reported that  
41 81% were performing hypothesis testing with sample sizes known to be insufficient,[6] compared to  
42 50% of pilot CRTs in our review. Arain et al. also reported 36% of studies performing sample size  
43 calculations. In our review, 17% performed calculations (all based on feasibility objectives), but if we  
44 include those that also correctly reported a rationale for the numbers in the pilot but without any  
45 calculation then this was 44%.  
46  
47  
48  
49  
50

51  
52 The general message that reporting of CRTs is suboptimal still holds.[8-11] The review by Diaz-Ordaz  
53 et al. (2013) of definitive trial CRTs reported that 37% presented a table showing baseline cluster  
54 characteristics, compared to 11% of pilot CRTs in our review. Diaz-Ordaz et al. (2013) also reported  
55 that 27% accounted for clustering in sample size calculations,[8] and a recent review by Fiero et al.  
56  
57  
58  
59  
60

1  
2  
3 reported 53%.[10] However, just 17% of pilot CRTs in our review considered the cluster design in the  
4 sample size rationale. Both these CRT reviews reviewed effectiveness/efficacy CRTs, for which the  
5 need to take account of clustering in sample sizes is generally well understood compared to pilot  
6 trials. In pilot trials the rationale for considering the clustered design in deciding on numbers in the  
7 pilot may be different, for example including a number of clusters with different characteristics to  
8 get an idea about the implementation of an intervention across different clusters.  
9  
10  
11  
12

### 13 14 **Strengths and limitations**

15 We used a robust search and data extraction procedure, including validation of the screening/sifting  
16 process and double data extraction. However, our inclusion criteria stipulated that papers must have  
17 the word 'pilot' or 'feasibility' in the title or abstract, so we may have missed some pilot CRTs and  
18 thus may have overestimated the percentage reporting 'pilot' or 'feasibility' in the title.  
19 Furthermore, we required authors to report that the trial was in preparation for a future definitive  
20 trial, so we expect that items related to the future definitive trial (e.g. progression criteria,  
21 generalisability, implications) may be better reported than they would for all publications of pilot  
22 CRTs which might include papers that did not report that they were in preparation for a future  
23 definitive trial clearly enough to be included. During sifting, we identified 50 trials that were  
24 assessing feasibility but did not show evidence of being in preparation for a future definitive trial.  
25 Most were assessing the feasibility of implementing an intervention targeted at members of the  
26 public, or discussing feasibility of the intervention with the aim of providing information to help  
27 researchers wanting to implement a similar intervention in similar settings or to raise questions for  
28 future research, rather than being in preparation for a trial assessing effectiveness/efficacy. Some of  
29 these 50 trials also appeared to be small effectiveness studies labelled as a pilot, usually only  
30 mentioning feasibility once or twice throughout the paper, with one trial explicitly stating that  
31 "Because of organizational changes... we had to stop the inclusion after 46 participants, and the  
32 study is consequently defined as a pilot study." [17] For the few trials that were potentially pilot CRTs  
33 not reported clearly enough, authors only spoke of future studies in general rather than clearly  
34 specifying the study was in preparation for a specific future definitive trial. Related to this, it is of  
35 interest to know the proportion of our 18 pilot CRTs that are actually followed by a future definitive  
36 trial, and we plan to investigate this in future.  
37  
38  
39  
40  
41  
42  
43  
44  
45  
46  
47  
48  
49  
50  
51

### 52 53 **CONCLUSION**

54  
55  
56  
57  
58  
59  
60

1  
2  
3 We may have overestimated the reporting quality of pilot CRTs; nevertheless our review  
4 demonstrates that reporting of pilot CRTs need improving. The identification of just 18 pilot CRTs  
5 between 2011 and 2014, mainly from the UK, highlights the need for increased awareness of the  
6 importance of carrying out and publishing pilot CRTs and good reporting so that these studies can be  
7 identified. Pilot CRTs should primarily be assessing feasibility, and avoiding formal hypothesis testing  
8 for effectiveness/efficacy. Improvement is needed in reporting reasons for the pilot, rationale for the  
9 sample size, and progression criteria, as well as the enrolment stage of clusters and how the cluster  
10 design affects aspects of design such as numbers of participants. We recommend adherence to the  
11 new CONSORT extension for pilot trials, in conjunction with the CONSORT extension for CRTs.[3, 4,  
12 7] We encourage journals to endorse the CONSORT statement, including extensions.  
13  
14  
15  
16  
17  
18  
19

#### 20 21 **CONTRIBUTORS:**

22 SE conceived the study and advised on the design and protocol. CC developed the design of the study, wrote  
23 the protocol, and designed the screening/sifting and data extraction sheet. CC performed screening and sifting  
24 on all papers identified by the electronic search, and CL carried out validation of the screening/sifting process.  
25 CC and CL performed independent data extraction on all papers included in the review. CC conducted the  
26 analyses of the data and took primary responsibility for writing the manuscript. All authors provided feedback  
27 on all versions of the paper. All authors read and approved the final manuscript. CC is the study guarantor.  
28  
29  
30  
31

#### 32 33 **COMPETING INTEREST STATEMENT:**

34 All authors have completed the ICMJE uniform disclosure form at [www.icmje.org/coi\\_disclosure.pdf](http://www.icmje.org/coi_disclosure.pdf) and  
35 declare that CC was funded by an NIHR Research Methods Fellowship during this project, and that SE and CC  
36 are authors on the new CONSORT extension for pilot trials.  
37  
38  
39

#### 40 41 **EXCLUSIVE LICENSE:**

42 The Corresponding Author has the right to grant on behalf of all authors and does grant on behalf of all  
43 authors, an exclusive licence on a worldwide basis to the BMJ Publishing Group Ltd and its Licensees to permit  
44 this article (if accepted) to be published in BMJ Open and any other BMJ PGL products to exploit all subsidiary  
45 rights, as set out in the licence <http://journals.bmj.com/site/authors/editorial-policies.xhtml#copyright> and  
46 the Corresponding Author accepts and understands that any supply made under these terms is made by  
47 BMJ PGL to the Corresponding Author. All articles published in BMJ Open will be made available on an Open  
48 Access basis (with authors being asked to pay an open access fee - see  
49 <http://bmjopen.bmj.com/site/about/resources.xhtml>) Access shall be governed by a Creative Commons  
50 licence – details as to which [Creative Commons](http://creativecommons.org/licenses/by/4.0/) licence will apply to the article are set out in the licence  
51 referred to above.  
52  
53  
54  
55

#### 56 57 58 **FUNDING:**

1  
2  
3 Claire Chan (nee Coleman) was funded by a National Institute for Health Research (NIHR) Research Methods  
4 Fellowship. This article presents independent research funded by the NIHR. The views expressed are those of  
5 the authors and not necessarily those of the NHS, the NIHR or the Department of Health. The funder played no  
6 role in the study.  
7  
8  
9

10 **ETHICAL APPROVAL:**

11 No ethics approval was necessary because this is a review of published literature. No patient data were used in  
12 this manuscript.  
13

14 **DATA SHARING STATEMENT:**

15  
16  
17 Extraction data are available from the corresponding author.  
18  
19

20 **TRANSPARENCY DECLARATION:**

21 This manuscript is an honest, accurate, and transparent account of the study being reported. No important  
22 aspects of the study have been omitted, and any discrepancies from the study as planned have been  
23 explained.  
24  
25  
26  
27  
28  
29  
30  
31  
32  
33  
34  
35  
36  
37  
38  
39  
40  
41  
42  
43  
44  
45  
46  
47  
48  
49  
50  
51  
52  
53  
54  
55  
56  
57  
58  
59  
60



## REFERENCES

1. Eldridge SM, Ashby D, Feder GS, Rudnicka AR, Ukoumunne OC. Lessons for cluster randomized trials in the twenty-first century: a systematic review of trials in primary care. *Clin Trials*. 2004;1(1):80-90.
2. Eldridge SM, Lancaster GA, Campbell MJ, Thabane L, Hopewell S, Coleman CL, et al. Defining Feasibility and Pilot Studies in Preparation for Randomised Controlled Trials: Development of a Conceptual Framework. *PloS one*. 2016;11(3):e0150205.
3. Eldridge SM, Chan CL, Campbell MJ, Bond CM, Hopewell S, Thabane L, et al. CONSORT 2010 statement: extension to randomised pilot and feasibility trials. *Pilot and Feasibility Studies*. 2016;2(1):64.
4. Eldridge SM, Chan CL, Campbell MJ, Bond CM, Hopewell S, Thabane L, et al. CONSORT 2010 statement: extension to randomised pilot and feasibility trials. *BMJ*. 2016;355(i5239).
5. Arnold DM, Burns KE, Adhikari NK, Kho ME, Meade MO, Cook DJ. The design and interpretation of pilot trials in clinical research in critical care. *Crit Care Med*. 2009;37(1 Suppl):S69-74.
6. Arain M, Campbell MJ, Cooper CL, Lancaster GA. What is a pilot or feasibility study? A review of current practice and editorial policy. *BMC Med Res Methodol*. 2010;10:67.
7. Campbell MK, Piaggio G, Elbourne DR, Altman DG. Consort 2010 statement: extension to cluster randomised trials. *BMJ : British Medical Journal*. 2012;345.
8. Diaz-Ordaz K, Froud R, Sheehan B, Eldridge S. A systematic review of cluster randomised trials in residential facilities for older people suggests how to improve quality. *BMC Med Res Methodol*. 2013;13:127.
9. Díaz-Ordaz K, Kenward MG, Cohen A, Coleman CL, Eldridge S. Are missing data adequately handled in cluster randomised trials? A systematic review and guidelines. *Clinical Trials*. 2014:1740774514537136.
10. Fiero MH, Huang S, Oren E, Bell ML. Statistical analysis and handling of missing data in cluster randomized trials: a systematic review. *Trials*. 2016;17(1):1.
11. Ivers N, Taljaard M, Dixon S, Bennett C, McRae A, Taleban J, et al. Impact of CONSORT extension for cluster randomised trials on quality of reporting and study methodology: review of random sample of 300 trials, 2000-8. *BMJ*. 2011;343:d5886.
12. Moher D, Hopewell S, Schulz KF, Montori V, Gøtzsche PC, Devereaux PJ, et al. CONSORT 2010 Explanation and Elaboration: updated guidelines for reporting parallel group randomised trials. *BMJ*. 2010;340.
13. Eldridge S, Kerry S. *A Practical Guide to Cluster Randomised Trials in Health Services Research*: Wiley; 2012.
14. Lancaster GA, Dodd S, Williamson PR. Design and analysis of pilot studies: recommendations for good practice. *J Eval Clin Pract*. 2004;10(2):307-12.
15. Moher D, Liberati A, Tetzlaff J, Altman DG. Preferred reporting items for systematic reviews and meta-analyses: the PRISMA statement. *Ann Intern Med*. 2009;151(4):264-9, w64.
16. Kistin C, Silverstein M. Pilot studies: A critical but potentially misused component of interventional research. *JAMA*. 2015;314(15):1561-2.
17. Mikkelsen LR, Mikkelsen SS, Christensen FB. Early, intensified home-based exercise after total hip replacement--a pilot study. *Physiother Res Int*. 2012;17(4):214-26.

## TABLES

Table 1: Pilot CRTs included in this review

| Author       | Year* | Journal                                                             | Title                                                                                                                                                                   | Cluster                                                             |
|--------------|-------|---------------------------------------------------------------------|-------------------------------------------------------------------------------------------------------------------------------------------------------------------------|---------------------------------------------------------------------|
| Begh [A1]    | 2011  | Trials                                                              | Promoting smoking cessation in Pakistani and Bangladeshi men in the UK: pilot cluster randomised controlled trial of trained community outreach workers                 | Census lower layer super output areas                               |
| Jones [A2]   | 2011  | Pediatric Exercise Science                                          | Promoting fundamental movement skill development and physical activity in early childhood settings: a cluster randomized controlled trial.                              | Childcare centers                                                   |
| Légaré [A3]  | 2010  | Health Expectations                                                 | Training family physicians in shared decision making for the use of antibiotics for acute respiratory infections: a pilot clustered randomized controlled trial.        | Family medicine groups                                              |
| Hopkins [A4] | 2012  | Health Education Research                                           | Implementing organizational physical activity and healthy eating strategies on paid time: process evaluation of the UCLA WORKING pilot study                            | Worksites - health and human service organizations                  |
| Jago [A5]    | 2012  | International Journal of Behavioral Nutrition and Physical Activity | Bristol girls dance project feasibility trial: outcome and process evaluation results                                                                                   | Secondary schools                                                   |
| Taylor [A6]  | 2011  | Clinical Rehabilitation                                             | A pilot cluster randomized controlled trial of structured goal-setting following stroke                                                                                 | Rehabilitation services                                             |
| Drahota [A7] | 2013  | Age and Ageing                                                      | Pilot cluster randomised controlled trial of flooring to reduce injuries from falls in wards for older people.                                                          | Study areas - bays within hospitals                                 |
| Frenn [A8]   | 2013  | Journal for Specialists in Pediatric Nursing                        | Authoritative feeding behaviors to reduce child BMI through online interventions                                                                                        | Classrooms                                                          |
| Gifford [A9] | 2012  | World Views on Evidence-Based Nursing                               | Developing leadership capacity for guideline use: a pilot cluster randomized control trial.                                                                             | Service delivery centers with nursing care for diabetic foot ulcers |
| Jones [A10]  | 2013  | Journal of Medical Internet Research                                | Recruitment to online therapies for depression: pilot cluster randomized controlled trial.                                                                              | Postcode areas                                                      |
| Moore [A11]  | 2013  | Substance Abuse Treatment, Prevention, and Policy                   | An exploratory cluster randomised trial of a university halls of residence based social norms marketing campaign to reduce alcohol consumption among 1st year students. | Residence halls                                                     |
| Pai [A12]    | 2013  | Implementation Science                                              | Strategies to enhance venous thromboprophylaxis in hospitalized medical patients (SENTRY): a pilot cluster randomized trial                                             | Hospitals                                                           |
| Reeves [A13] | 2013  | BMC Health Services Research                                        | Facilitated patient experience feedback can improve nursing care: a pilot study for a phase III cluster randomised controlled trial.                                    | Wards                                                               |
| Teut [A14]   | 2013  | Clinical Interventions in Aging                                     | Effects and feasibility of an Integrative Medicine program for geriatric patients-a cluster-randomized pilot study.                                                     | Shared apartments                                                   |
| Jago [A15]   | 2014  | International Journal of Behavioral Nutrition and Physical Activity | Randomised feasibility trial of a teaching assistant led extracurricular physical activity intervention for 9 to 11 year olds: Action 3:30                              | Primary schools                                                     |
| Michie [A16] | 2014  | Contraception                                                       | Pharmacy-based interventions for initiating effective contraception following the use of emergency contraception: a pilot study                                         | Pharmacies                                                          |
| Mytton [A17] | 2014  | Health Technology Assessment                                        | The feasibility of using a parenting programme for the prevention of unintentional home injuries in the under-fives: a cluster randomised controlled trial.             | Children's centres                                                  |
| Thomas [A18] | 2014  | Trials                                                              | Identifying continence options after stroke (ICONS): a cluster randomised controlled feasibility trial                                                                  | Stroke services                                                     |

\* We extracted the earlier of the print and electronic publication year.

**Table 2: Characteristics of pilot CRTs included in this review**

| Characteristic                                                          | Number of trials (%) |
|-------------------------------------------------------------------------|----------------------|
| Publication year (earlier of the print and electronic publication date) |                      |
| 2010 <sup>a</sup>                                                       | 1 (6)                |
| 2011                                                                    | 3 (17)               |
| 2012                                                                    | 3 (17)               |
| 2013                                                                    | 7 (39)               |
| 2014                                                                    | 4 (22)               |
| Country                                                                 |                      |
| UK                                                                      | 10 (56)              |
| Canada                                                                  | 3 (17)               |
| USA                                                                     | 2 (11)               |
| Germany                                                                 | 1 (6)                |
| New Zealand                                                             | 1 (6)                |
| Australia                                                               | 1 (6)                |
| Method of cluster randomisation <sup>b</sup>                            |                      |
| Simple                                                                  | 1 (8)                |
| Stratified with blocks                                                  | 9 (69)               |
| Blocked only                                                            | 2 (15)               |
| Bias coin method                                                        | 1 (8)                |
| Number of clusters randomised <sup>c</sup>                              |                      |
| Median (IQR)                                                            | 8 (4 to 16)          |
| Range                                                                   | 2 to 50              |
| Average cluster size <sup>d</sup>                                       |                      |
| Median (IQR)                                                            | 32 (14 to 82)        |
| Range                                                                   | 7 to 588             |

<sup>a</sup> 1 paper has an extracted publication year outside of the 2011 to 2014 range. This is because the print publication date for this paper was 2011 but the online publication date was 2010, so the paper satisfies the inclusion criteria which states that the publication date, print or electronic, must be between 2011 and 2014, but we extract the earlier of the print and electronic dates.

<sup>b</sup> 13 of the 18 trials reported their method of randomisation. Percentages are given as a percentage of these 13 trials.

<sup>c</sup> Not reported for 1 trial.

<sup>d</sup> Defined as number of individuals randomised divided by number of clusters randomised, based on 12 trials that reported information on both.

**Table 3: Pilot trial objectives and methods**

| Characteristic                                                                                                  | Number of trials (%) |
|-----------------------------------------------------------------------------------------------------------------|----------------------|
| Primary objective is feasibility <sup>1</sup>                                                                   | 10 (56)              |
| Main <u>feasibility</u> objective given                                                                         |                      |
| <i>Where feasibility is primary objective</i>                                                                   |                      |
| Implementing intervention                                                                                       | 6/10 (60)            |
| Recruitment and retention                                                                                       | 3/10 (30)            |
| Feasibility of cluster design                                                                                   | 1/10 (10)            |
| <i>Where feasibility is not primary objective<sup>2</sup></i>                                                   |                      |
| Implementing intervention                                                                                       | 3/8 (38)             |
| Recruitment                                                                                                     | 2/8 (25)             |
| Cluster design                                                                                                  | 1/8 (13)             |
| Feasibility of trial being able to answer the effectiveness question (and what study design would enable this)  | 1/8 (13)             |
| Feasibility of larger study                                                                                     | 1/8 (13)             |
| Method used to address main <u>feasibility</u> objective given                                                  |                      |
| <i>Where feasibility is primary objective</i>                                                                   |                      |
| Descriptive statistics and/or qualitative                                                                       | 9/10 (90)            |
| Statistical test                                                                                                | 1/10 (10)            |
| <i>Where feasibility is not primary objective</i>                                                               |                      |
| Descriptive statistics/Qualitative                                                                              | 3/8 (38)             |
| None given/reported elsewhere                                                                                   | 5/8 (63)             |
| Rationale for numbers in pilot trial based on formal power calculation for effectiveness/ efficacy <sup>3</sup> | 0/8 (0)              |
| Performing any formal hypothesis testing for effectiveness/ efficacy                                            | 9/18 (50)            |
| Making any statements about effectiveness/ efficacy without a caveat                                            | 4/18 (22)            |

<sup>1</sup> Where the primary objective was not feasibility, the primary objective was effectiveness/ potential effectiveness and was addressed using statistical tests.

<sup>2</sup> One of the inclusion criteria was that studies were assessing feasibility, but it did not have to be the primary objective

<sup>3</sup> Based on 8 trials that reported a rationale for the sample size of the pilot trial

Table 4: Number (%) of reports adhering to pilot CRT quality criteria

|                            | Item       | Criterion                                                                                                                                                                                                                                                                    | n(%)                                                                     |
|----------------------------|------------|------------------------------------------------------------------------------------------------------------------------------------------------------------------------------------------------------------------------------------------------------------------------------|--------------------------------------------------------------------------|
| Title and Abstract         | 1a         | Term 'pilot' or 'feasibility' included in the title<br>Identification as a pilot or feasibility randomised trial in the title                                                                                                                                                | 15 (83)<br>12 (67)                                                       |
|                            | <b>1a</b>  | <b>Term 'cluster' included in the title</b><br><b>Identification as a cluster randomised trial in the title</b>                                                                                                                                                              | 12 (67)<br>12 (67)                                                       |
| Introduction               | 2a         | Scientific background and explanation of rationale for future definitive trial reported                                                                                                                                                                                      | 18 (100)                                                                 |
|                            | [S]        | Reasons for randomised pilot trial reported                                                                                                                                                                                                                                  | 7 (39)                                                                   |
|                            | <b>2a</b>  | <b>Rationale given for using cluster design</b>                                                                                                                                                                                                                              | 6 (33)                                                                   |
| Methods – Trial design     | 3a         | Description of pilot trial design                                                                                                                                                                                                                                            | 18 (100)                                                                 |
|                            | <b>3a</b>  | <b>Definition of cluster</b>                                                                                                                                                                                                                                                 | 18 (100)                                                                 |
|                            | 3b         | Reported any changes to methods after pilot trial commencement<br>If yes, reported reasons                                                                                                                                                                                   | 5 (28)<br>5 (100)                                                        |
| Methods – Participants     | 4a         | Reported eligibility criteria for participants                                                                                                                                                                                                                               | 13 (72)                                                                  |
|                            | <b>4a</b>  | <b>Reported eligibility criteria for clusters</b>                                                                                                                                                                                                                            | 9 (50)                                                                   |
|                            | 4b         | Reported settings and locations where the data were collected                                                                                                                                                                                                                | 18 (100)                                                                 |
|                            | 4c         | Reported how participants were identified                                                                                                                                                                                                                                    | 9 (50)                                                                   |
|                            | [N]        | <b>Reported how clusters were identified</b><br>Reported how participants were consented <sup>1</sup><br><b>Reported how clusters were consented</b>                                                                                                                         | 6 (33)<br>13/17 (76)<br>2 (11)                                           |
| Methods – Interventions    | 5          | Described the interventions for each group                                                                                                                                                                                                                                   | 13 (72)                                                                  |
| Methods - Outcomes         | 6b         | Reported any changes to pilot trial assessments or measurements after pilot trial commencement<br>If yes, reported reasons                                                                                                                                                   | 1 (6)<br>1(100)                                                          |
|                            | 6c         | Reported criteria used to judge whether, or how, to proceed with the future definitive trial                                                                                                                                                                                 | 3 (17)                                                                   |
| Methods – Sample size      | 7a         | Reported a rationale for the sample size of the pilot trial                                                                                                                                                                                                                  | 8 (44)                                                                   |
|                            | [S]        |                                                                                                                                                                                                                                                                              |                                                                          |
|                            | <b>7a</b>  | <b>Cluster design considered during the description of the rationale for numbers in the pilot trial</b>                                                                                                                                                                      | 3 (17)                                                                   |
|                            | 7b         | Reported stopping guidelines                                                                                                                                                                                                                                                 | 0 (0)                                                                    |
| Methods - Randomisation    | 8a         | Reported method used to generate the random allocation sequence                                                                                                                                                                                                              | 9 (50)                                                                   |
|                            | 8b         | Reported randomisation method                                                                                                                                                                                                                                                | 13 (72)                                                                  |
|                            | 9          | Reported mechanism used to implement the random allocation sequence<br>Reported allocation concealment                                                                                                                                                                       | 4 (22)<br>7 (39)                                                         |
|                            | 10/        | Reported who:<br>Generated the random allocation sequence                                                                                                                                                                                                                    | 8 (44)                                                                   |
|                            | <b>10a</b> | <b>Enrolled clusters</b><br><b>Assigned clusters to interventions</b>                                                                                                                                                                                                        | 3 (17)<br>4 (22)                                                         |
|                            | <b>10c</b> | <b>Reported from whom consent was sought</b><br><i>Reported whether consent was sought from participants</i><br><b>Reported whether consent was sought from clusters</b><br><b>Reported whether participant consent was sought before or after randomisation<sup>1</sup></b> | 2 (11)<br>17 (94)<br>2 (11)<br>8/17 (47)                                 |
| Methods - Blinding         | 11a        | Reported on whether there was blinding<br>Reported who was blinded <sup>2</sup><br>Reported how they were blinded <sup>2</sup>                                                                                                                                               | 10 (56)<br>6/14 (43)<br>1/14 (7)                                         |
|                            | <b>12a</b> | <b>Reports clustering accounted for in any of the methods used to address pilot trial objectives/ research questions<sup>3</sup></b>                                                                                                                                         | 13/17 (76)                                                               |
| Results – Participant flow | 13*        | Reports a diagram with flow of individuals through the trial                                                                                                                                                                                                                 | 12 (67)                                                                  |
|                            | <b>13*</b> | <b>Reports a diagram with flow of clusters through the trial</b>                                                                                                                                                                                                             | 10 (56)                                                                  |
|                            | 13a/       | Reported number of:<br>Individuals ( <b>Clusters</b> ) approached and/or assessed for eligibility <sup>4</sup>                                                                                                                                                               | 8/17 (47); 10/18 (56)                                                    |
|                            | [S]        | Individuals ( <b>Clusters</b> ) randomly assigned <sup>4</sup><br>Individuals ( <b>Clusters</b> ) that received intended treatment <sup>4;4</sup><br>Individuals ( <b>Clusters</b> ) that were assessed for primary objective <sup>4;4</sup>                                 | 13/17 (76); 17/18 (94)<br>8/17 (47); 5/17 (29)<br>16/17 (94); 14/17 (82) |
|                            | 13b/       | Reported number of:<br>Losses for individuals ( <b>Clusters</b> ) after randomisation <sup>4;4</sup><br>Exclusions for individuals ( <b>Clusters</b> ) after randomisation <sup>4;4</sup>                                                                                    | 11/16 (69); 6/17 (35)<br>1/17 (6); 3/17 (18)                             |
|                            | <b>13b</b> |                                                                                                                                                                                                                                                                              |                                                                          |
|                            | 14a        | Reported on dates defining the periods of recruitment                                                                                                                                                                                                                        | 8 (44)                                                                   |

|                                   |            |                                                                                                             |                               |
|-----------------------------------|------------|-------------------------------------------------------------------------------------------------------------|-------------------------------|
|                                   |            | Reported on dates defining the periods of follow up                                                         | 11 (61)                       |
|                                   | 14b        | Reported the pilot trial ended/stopped                                                                      | 0 (0)                         |
| Results – Baseline data           | 15         | Reported a table showing baseline characteristics for the individual level<br>If yes, by group              | 12 (67)<br>11/12 (92)         |
|                                   | <b>15</b>  | <b>Reported a table showing baseline characteristics for the cluster level<br/>If yes, by group</b>         | 2 (11)<br>2/2 (100)           |
| Results – Outcomes and estimation | 17a        | Reported results for main feasibility objective (quantitative or qualitative) <sup>5</sup>                  | 13/17 (76)                    |
| Results - Harms                   | 19         | Reported on harms or unintended effects                                                                     | 4 (22)                        |
|                                   | 19a<br>[N] | Reported other unintended consequences                                                                      | 0 (0)                         |
| Discussion                        | 20<br>[S]  | Reported limitations of pilot trial<br>Reported sources of potential bias<br>Reported remaining uncertainty | 17 (94)<br>10 (56)<br>10 (56) |
|                                   | 21<br>[S]  | Reported generalisability of pilot trial methods/findings to future definitive trial or other studies       | 16 (89)                       |
|                                   | 22         | Interpretation of feasibility consistent with main feasibility objectives and findings <sup>5</sup>         | 12/17 (71)                    |
|                                   | 22A<br>[N] | Reported implications for progression from the pilot to the future definitive trial                         | 16 (89)                       |
| Other information                 | 23         | Reported registration number for pilot trial<br>Reported name of registry for pilot trial                   | 11 (61)<br>11 (61)            |
|                                   | 24<br>[S]  | Reported where the pilot trial protocol can be accessed                                                     | 7 (39)                        |
|                                   | 25         | Reported source of funding                                                                                  | 18 (100)                      |
|                                   | 26<br>[N]  | Reported ethical approval/research review committee approval<br>If yes, reported reference number           | 17 (94)<br>8/17 (47)          |

Item numbers refer to the item in the CONSORT extension for pilot trials (*or for CRTs*) that the item is based on.

[N] represents new items added to the CONSORT extension for pilot trials.

[S] represents items substantially adapted from the CONSORT 2010 for RCTs.

**Items specifically relating to the cluster aspect of pilot CRTs are shown in bold italics.**

\*The CONSORT statements do not include an item 13 but the participant flow subheading strongly recommends a diagram.

<sup>1</sup> Item not relevant for 1 trial [A12] because they said that the Ethics Board determined it could be conducted without informed consent from patients or surrogates.

<sup>2</sup> Item not relevant for 4 trials [A7, A10, A12, A18] because they reported that blinding was not used.

<sup>3</sup> Item not relevant for 1 trial because no confidence intervals/p-values were given,[A17] so clustering did not need to be accounted for in any of their methods because effect estimates are not biased by cluster randomisation, only confidence intervals/p-values.

<sup>4</sup> Not relevant for 1 trial due to the design of the study.[A10] (This paper was different from the others such that it was not relevant to extract these items. The clusters were postcode areas and they were assessing two online recruitment interventions and comparing the success of the recruitment interventions. As such, participants were those who completed the online questions, and each arm of the study had a “total population ranging from 1.6 to 2 million people clustered in 4 postcode areas”)

<sup>4\*</sup> Not relevant for 2 trials due to the design of these studies.[A10, A12] (See reason above for A10. For A12, data was collected from medical patient charts so these items were not relevant to extract)

<sup>5</sup> One paper reports the feasibility results in a separate paper so is not included.[A3]

1  
2  
3  
4  
5  
6  
7  
8  
9  
10  
11  
12  
13  
14  
15  
16  
17  
18  
19  
20  
21  
22  
23  
24  
25  
26  
27  
28  
29  
30  
31  
32  
33  
34  
35  
36  
37  
38  
39  
40  
41  
42  
43  
44  
45  
46  
47  
48  
49  
50  
51  
52  
53  
54  
55  
56  
57  
58  
59  
60

**FIGURES**

**Figure 1: Flow diagram of the identification process for the sample of 18 pilot cluster randomised trials included in this review**

**APPENDICES**

**Appendix 1: Search strategy**

**Appendix 2: Data extracted**

**Appendix 3: List of studies included in this systematic review**

For peer review only

1  
2  
3  
4  
5  
6  
7  
8  
9  
10  
11  
12  
13  
14  
15  
16  
17  
18  
19  
20  
21  
22  
23  
24  
25  
26  
27  
28  
29  
30  
31  
32  
33  
34  
35  
36  
37  
38  
39  
40  
41  
42  
43  
44  
45  
46  
47  
48  
49  
50  
51  
52  
53  
54  
55  
56  
57  
58  
59  
60

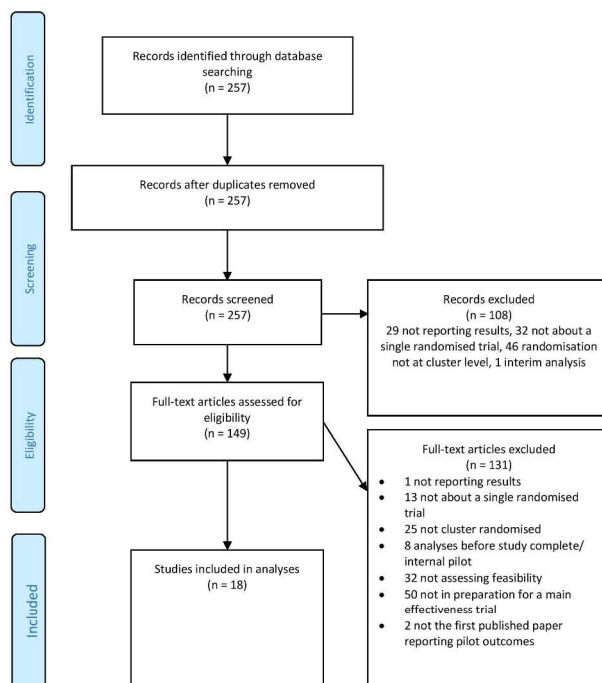

Flow diagram of the identification process for the sample of 18 pilot cluster randomised trials included in this review

210x297mm (300 x 300 DPI)



**Appendix 1: Search strategy**

|      |                                                                                                                                                                                                                            |
|------|----------------------------------------------------------------------------------------------------------------------------------------------------------------------------------------------------------------------------|
| #1:  | randomised trial [All fields]                                                                                                                                                                                              |
| #2:  | randomized trial [All fields]                                                                                                                                                                                              |
| #3:  | #1 OR #2                                                                                                                                                                                                                   |
| #4:  | clinical trial [All Fields]                                                                                                                                                                                                |
| #5:  | #3 AND #4                                                                                                                                                                                                                  |
| #6:  | ((cluster randomization) OR (cluster randomisation) OR (cluster) OR (clustered) OR (clustering) OR (clusters)<br>OR (group-randomized) OR (group-randomised) OR (randomisation unit) OR (randomization unit)) [All fields] |
| #7:  | #5 AND #6                                                                                                                                                                                                                  |
| #8:  | pilot [Title/Abstract]                                                                                                                                                                                                     |
| #9:  | feasibility [Title/Abstract]                                                                                                                                                                                               |
| #10: | #8 OR #9                                                                                                                                                                                                                   |
| #11: | #7 AND #10                                                                                                                                                                                                                 |
| #12: | protocol [Title]                                                                                                                                                                                                           |
| #13: | #11 NOT #12                                                                                                                                                                                                                |
| #14: | ("2011/01/01"[Date - Publication] : "2014/12/31"[Date - Publication])                                                                                                                                                      |
| #15: | #13 AND #14                                                                                                                                                                                                                |

## Appendix 2: Data extracted

| Items                                                                                                           | Data extracted                                         | Further information                                                                                                                                                                                                                                                                                       |
|-----------------------------------------------------------------------------------------------------------------|--------------------------------------------------------|-----------------------------------------------------------------------------------------------------------------------------------------------------------------------------------------------------------------------------------------------------------------------------------------------------------|
| Descriptives                                                                                                    |                                                        |                                                                                                                                                                                                                                                                                                           |
| Name of first author                                                                                            | Text                                                   |                                                                                                                                                                                                                                                                                                           |
| Publication year                                                                                                | Date                                                   | The earlier of the print date and electronic date                                                                                                                                                                                                                                                         |
| Journal                                                                                                         | Text                                                   |                                                                                                                                                                                                                                                                                                           |
| Title                                                                                                           | Text                                                   |                                                                                                                                                                                                                                                                                                           |
| Country (or countries) in which the trial was set                                                               | Text                                                   |                                                                                                                                                                                                                                                                                                           |
| Setting where the data were collected                                                                           | Text                                                   | e.g. community, hospital clinic etc.                                                                                                                                                                                                                                                                      |
| Pilot trial design                                                                                              | Parallel CRT, factorial CRT, cross-over CRT, other CRT |                                                                                                                                                                                                                                                                                                           |
| What was the cluster?                                                                                           | Text                                                   |                                                                                                                                                                                                                                                                                                           |
| Method of cluster randomisation                                                                                 | Text                                                   |                                                                                                                                                                                                                                                                                                           |
| Number of clusters randomised                                                                                   | Number                                                 |                                                                                                                                                                                                                                                                                                           |
| Number of individuals randomised                                                                                | Number                                                 |                                                                                                                                                                                                                                                                                                           |
| Additional items relating to pilot trial methodology                                                            |                                                        |                                                                                                                                                                                                                                                                                                           |
| Primary objective/ research question of the pilot trial                                                         | Text                                                   | As specified by the author, else the outcome used in the sample size justification, or else the first objective/ research question mentioned in the abstract or else main text (following a similar method as that used by Diaz-Ordaz et al.[8])                                                          |
| Is the primary objective feasibility?                                                                           | Yes/No                                                 |                                                                                                                                                                                                                                                                                                           |
| Primary objective/ research question measure                                                                    | Text                                                   |                                                                                                                                                                                                                                                                                                           |
| Method used to address primary objective/ research question                                                     | Text                                                   | Defined as the main method presented for the primary objective/ research question                                                                                                                                                                                                                         |
| Main feasibility objective/ research question of the pilot trial                                                | Text                                                   | As specified by the author, else the feasibility outcome used in the sample size justification, or else the first feasibility objective/ research question mentioned in the abstract or else main text                                                                                                    |
| Main feasibility objective/ research question measure                                                           | Text                                                   |                                                                                                                                                                                                                                                                                                           |
| Method used to address main feasibility objective/ research question                                            | Text                                                   | Defined as the main method presented for the primary objective/ research question                                                                                                                                                                                                                         |
| Is the rationale for numbers in the pilot trial based on formal power calculation for effectiveness (efficacy)? | Yes/no                                                 |                                                                                                                                                                                                                                                                                                           |
| Is the paper performing any formal hypothesis testing for effectiveness/ efficacy?                              | Yes/no                                                 |                                                                                                                                                                                                                                                                                                           |
| Is the paper making any statements about effectiveness/ efficacy without a caveat                               | Yes/no                                                 | The caveat must explain that it is an indication of <i>potential</i> effectiveness or explain that the study is underpowered                                                                                                                                                                              |
| Title and Abstract                                                                                              |                                                        |                                                                                                                                                                                                                                                                                                           |
| Term 'pilot' or 'feasibility' included in the title                                                             | Yes/no                                                 |                                                                                                                                                                                                                                                                                                           |
| Identification as a pilot or feasibility randomised trial in the title                                          | Yes/no                                                 | Require 'pilot randomised trial' or 'feasibility randomised trial' in the title, or 'pilot study' or 'feasibility study' and 'randomised trial' in the title                                                                                                                                              |
| Term 'cluster' included in the title                                                                            | Yes/no                                                 |                                                                                                                                                                                                                                                                                                           |
| Identification as a cluster randomised trial in the title                                                       | Yes/no                                                 | Require 'cluster randomised trial' in the title – don't accept 'clustered' as this can imply correlation rather than cluster randomised                                                                                                                                                                   |
| Introduction                                                                                                    |                                                        |                                                                                                                                                                                                                                                                                                           |
| Scientific background and explanation of rationale for future definitive trial reported                         | Yes/no                                                 |                                                                                                                                                                                                                                                                                                           |
| Reasons for randomised pilot trial reported                                                                     | Yes/no                                                 | We specified there needed to be a rationale in the introduction section for the randomised pilot trial, which was not just simply stating the aims/ objectives/outcomes of the pilot trial but gave a clear rationale of why the pilot trial was needed before proceeding to the future definitive trial. |

|    |                                                                                                  |        |                                                                                                                                                                                        |
|----|--------------------------------------------------------------------------------------------------|--------|----------------------------------------------------------------------------------------------------------------------------------------------------------------------------------------|
| 1  |                                                                                                  |        |                                                                                                                                                                                        |
| 2  |                                                                                                  |        |                                                                                                                                                                                        |
| 3  | Rationale given for using cluster design                                                         | Yes/no |                                                                                                                                                                                        |
| 4  | <b>Methods – Trial design</b>                                                                    |        |                                                                                                                                                                                        |
| 5  | Description of pilot trial design                                                                | Yes/no |                                                                                                                                                                                        |
| 6  | Definition of cluster                                                                            | Yes/no |                                                                                                                                                                                        |
| 7  | Reported any changes to methods after pilot trial commencement                                   | Yes/no |                                                                                                                                                                                        |
| 8  | If yes, reported reasons                                                                         | Yes/no |                                                                                                                                                                                        |
| 9  | <b>Methods – Participants</b>                                                                    |        |                                                                                                                                                                                        |
| 10 | Reported eligibility criteria for participants                                                   | Yes/no |                                                                                                                                                                                        |
| 11 | Reported eligibility criteria for clusters                                                       | Yes/no |                                                                                                                                                                                        |
| 12 | Reported settings and locations where the data were collected                                    | Yes/no |                                                                                                                                                                                        |
| 13 | Reported how participants were identified                                                        | Yes/no | We required that the authors describe the exact way the participants were identified (e.g. during consultations/visits to the cluster, or through advertisement requesting volunteers) |
| 14 |                                                                                                  |        |                                                                                                                                                                                        |
| 15 |                                                                                                  |        |                                                                                                                                                                                        |
| 16 |                                                                                                  |        |                                                                                                                                                                                        |
| 17 | Reported how clusters were identified                                                            | Yes/no | We required that the authors describe the exact way the clusters were identified (e.g. all clusters in a particular geographical location, or selection from a register/list etc.)     |
| 18 |                                                                                                  |        |                                                                                                                                                                                        |
| 19 |                                                                                                  |        |                                                                                                                                                                                        |
| 20 | Reported how participants were consented                                                         | Yes/no |                                                                                                                                                                                        |
| 21 | Reported how clusters were consented                                                             | Yes/no |                                                                                                                                                                                        |
| 22 | <b>Methods – Interventions</b>                                                                   |        |                                                                                                                                                                                        |
| 23 | Described the interventions for each group                                                       | Yes/no |                                                                                                                                                                                        |
| 24 | <b>Methods – Outcomes</b>                                                                        |        |                                                                                                                                                                                        |
| 25 | Reported any changes to pilot trial assessments or measurements after pilot trial commencement   | Yes/no |                                                                                                                                                                                        |
| 26 | If yes, reported reasons                                                                         | Yes/no |                                                                                                                                                                                        |
| 27 | Reported criteria used to judge whether, or how, to proceed with the future definitive trial     | Yes/no |                                                                                                                                                                                        |
| 28 |                                                                                                  |        |                                                                                                                                                                                        |
| 29 | <b>Methods – Sample size</b>                                                                     |        |                                                                                                                                                                                        |
| 30 | Reported a rationale for the sample size of the pilot trial                                      | Yes/no |                                                                                                                                                                                        |
| 31 | Cluster design considered during the description of the rationale for numbers in the pilot trial | Yes/no |                                                                                                                                                                                        |
| 32 | Reported stopping guidelines                                                                     | Yes/no |                                                                                                                                                                                        |
| 33 |                                                                                                  |        |                                                                                                                                                                                        |
| 34 | <b>Methods – Randomisation</b>                                                                   |        |                                                                                                                                                                                        |
| 35 | Reported method used to generate the random allocation sequence                                  | Yes/no | e.g. random numbers table, coin tossing, computer generated random list                                                                                                                |
| 36 | Reported randomisation method                                                                    | Yes/no |                                                                                                                                                                                        |
| 37 | If yes, randomisation method                                                                     | Text   | e.g. simple, stratification, blocking, matching                                                                                                                                        |
| 38 | Reported mechanism used to implement the random allocation sequence                              | Yes/no | e.g. sequentially numbered containers, sealed envelopes, central telephone                                                                                                             |
| 39 |                                                                                                  |        |                                                                                                                                                                                        |
| 40 | Reported allocation concealment                                                                  | Yes/no |                                                                                                                                                                                        |
| 41 | Reported who:                                                                                    |        |                                                                                                                                                                                        |
| 42 | Generated the random allocation sequence                                                         | Yes/no |                                                                                                                                                                                        |
| 43 | Enrolled clusters                                                                                | Yes/no |                                                                                                                                                                                        |
| 44 | Assigned clusters to interventions                                                               | Yes/no | Tick yes for last two points if a 'who' is not relevant since done by e.g. post/online                                                                                                 |
| 45 | Reported whether consent was sought from participants                                            | Yes/no |                                                                                                                                                                                        |
| 46 | Reported whether consent was sought from clusters                                                | Yes/no |                                                                                                                                                                                        |
| 47 | Reported from whom consent was sought                                                            | Yes/no | I.e. reported both whether consent was sought from participants and whether consent was sought from clusters                                                                           |
| 48 |                                                                                                  |        |                                                                                                                                                                                        |
| 49 | Reported whether participant consent was sought before or after randomisation                    | Yes/no |                                                                                                                                                                                        |
| 50 |                                                                                                  |        |                                                                                                                                                                                        |
| 51 | <b>Methods – Blinding</b>                                                                        |        |                                                                                                                                                                                        |
| 52 | Reported on whether there was blinding                                                           | Yes/no |                                                                                                                                                                                        |
| 53 | Reported who was blinded                                                                         | Yes/no | tick yes if they report anyone who was blinded, even if they don't report on everyone                                                                                                  |
| 54 |                                                                                                  |        |                                                                                                                                                                                        |
| 55 | Reported how they were blinded                                                                   | Yes/no | tick yes if they report on how anyone was blinded, even if they don't report on how everyone who was blinded was blinded                                                               |
| 56 |                                                                                                  |        |                                                                                                                                                                                        |
| 57 |                                                                                                  |        |                                                                                                                                                                                        |
| 58 | <b>Methods – Analytical methods</b>                                                              |        |                                                                                                                                                                                        |
| 59 |                                                                                                  |        |                                                                                                                                                                                        |
| 60 |                                                                                                  |        |                                                                                                                                                                                        |

|    |                                                                                                                   |                                                 |                                                                                                                                                                                                                                                                                                                                                                                                                                                                                                                     |
|----|-------------------------------------------------------------------------------------------------------------------|-------------------------------------------------|---------------------------------------------------------------------------------------------------------------------------------------------------------------------------------------------------------------------------------------------------------------------------------------------------------------------------------------------------------------------------------------------------------------------------------------------------------------------------------------------------------------------|
| 1  | Reports clustering accounted for in any of the methods used to address pilot trial objectives/ research questions | Yes/no                                          |                                                                                                                                                                                                                                                                                                                                                                                                                                                                                                                     |
| 2  | <b>Results – Participant flow</b>                                                                                 |                                                 |                                                                                                                                                                                                                                                                                                                                                                                                                                                                                                                     |
| 3  | Reports a diagram with flow of individuals through the trial                                                      | Yes/no                                          |                                                                                                                                                                                                                                                                                                                                                                                                                                                                                                                     |
| 4  | Reports a diagram with flow of clusters through the trial                                                         | Yes/no                                          |                                                                                                                                                                                                                                                                                                                                                                                                                                                                                                                     |
| 5  | Reported number of:                                                                                               |                                                 |                                                                                                                                                                                                                                                                                                                                                                                                                                                                                                                     |
| 6  | Individuals approached and/or assessed for eligibility                                                            | Yes/no                                          |                                                                                                                                                                                                                                                                                                                                                                                                                                                                                                                     |
| 7  | Individuals randomly assigned                                                                                     | Yes/no                                          |                                                                                                                                                                                                                                                                                                                                                                                                                                                                                                                     |
| 8  | Individuals that received intended treatment                                                                      | Yes/no                                          |                                                                                                                                                                                                                                                                                                                                                                                                                                                                                                                     |
| 9  | Losses for individuals after randomisation                                                                        | Yes/no                                          |                                                                                                                                                                                                                                                                                                                                                                                                                                                                                                                     |
| 10 | Exclusions for individuals after randomisation                                                                    | Yes/no                                          |                                                                                                                                                                                                                                                                                                                                                                                                                                                                                                                     |
| 11 | Individuals that were assessed for primary objective                                                              | Yes/no                                          |                                                                                                                                                                                                                                                                                                                                                                                                                                                                                                                     |
| 12 | Reported number of:                                                                                               |                                                 |                                                                                                                                                                                                                                                                                                                                                                                                                                                                                                                     |
| 13 | Clusters approached and/or assessed for eligibility                                                               | Yes/no                                          |                                                                                                                                                                                                                                                                                                                                                                                                                                                                                                                     |
| 14 | Clusters randomly assigned                                                                                        | Yes/no                                          |                                                                                                                                                                                                                                                                                                                                                                                                                                                                                                                     |
| 15 | Clusters that received intended treatment                                                                         | Yes/no                                          |                                                                                                                                                                                                                                                                                                                                                                                                                                                                                                                     |
| 16 | Losses for clusters after randomisation                                                                           | Yes/no                                          |                                                                                                                                                                                                                                                                                                                                                                                                                                                                                                                     |
| 17 | Exclusions for clusters after randomisation                                                                       | Yes/no                                          |                                                                                                                                                                                                                                                                                                                                                                                                                                                                                                                     |
| 18 | Clusters that were assessed for primary objective                                                                 | Yes/no                                          |                                                                                                                                                                                                                                                                                                                                                                                                                                                                                                                     |
| 19 | <b>Results – Recruitment</b>                                                                                      |                                                 |                                                                                                                                                                                                                                                                                                                                                                                                                                                                                                                     |
| 20 | Reported on dates defining the periods of recruitment                                                             | Yes/no                                          |                                                                                                                                                                                                                                                                                                                                                                                                                                                                                                                     |
| 21 | Reported on dates defining the periods of follow up                                                               | Yes/no                                          |                                                                                                                                                                                                                                                                                                                                                                                                                                                                                                                     |
| 22 | Reported the pilot trial ended/stopped                                                                            | Yes/no                                          |                                                                                                                                                                                                                                                                                                                                                                                                                                                                                                                     |
| 23 | <b>Results – Baseline data</b>                                                                                    |                                                 |                                                                                                                                                                                                                                                                                                                                                                                                                                                                                                                     |
| 24 | Reported a table showing baseline characteristics for the individual level                                        | Yes/no                                          |                                                                                                                                                                                                                                                                                                                                                                                                                                                                                                                     |
| 25 | If yes, by group                                                                                                  | Yes/no                                          |                                                                                                                                                                                                                                                                                                                                                                                                                                                                                                                     |
| 26 | Reported a table showing baseline characteristics for the cluster level                                           | Yes/no                                          |                                                                                                                                                                                                                                                                                                                                                                                                                                                                                                                     |
| 27 | If yes, by group                                                                                                  | Yes/no                                          |                                                                                                                                                                                                                                                                                                                                                                                                                                                                                                                     |
| 28 | <b>Results – Outcomes and estimation</b>                                                                          |                                                 |                                                                                                                                                                                                                                                                                                                                                                                                                                                                                                                     |
| 29 | Reported results for main feasibility objective (quantitative or qualitative)                                     | Yes/no                                          |                                                                                                                                                                                                                                                                                                                                                                                                                                                                                                                     |
| 30 | <b>Results – Harms</b>                                                                                            |                                                 |                                                                                                                                                                                                                                                                                                                                                                                                                                                                                                                     |
| 31 | Reported on harms or unintended effects                                                                           | Yes/no                                          | Tick yes even if reported that there were no harms                                                                                                                                                                                                                                                                                                                                                                                                                                                                  |
| 32 | Reported other unintended consequences                                                                            | Yes/no                                          | An unintended consequence would be an unexpected result/finding that was not one of the objectives to explore and where the result would have consequences on the future definitive trial, such as a change in design/population etc.                                                                                                                                                                                                                                                                               |
| 33 | <b>Discussion</b>                                                                                                 |                                                 |                                                                                                                                                                                                                                                                                                                                                                                                                                                                                                                     |
| 34 | Reported limitations of pilot trial                                                                               | Yes/no                                          |                                                                                                                                                                                                                                                                                                                                                                                                                                                                                                                     |
| 35 | Reported sources of potential bias                                                                                | Yes/no                                          |                                                                                                                                                                                                                                                                                                                                                                                                                                                                                                                     |
| 36 | Reported remaining uncertainty                                                                                    | Yes/no                                          |                                                                                                                                                                                                                                                                                                                                                                                                                                                                                                                     |
| 37 | Reported generalisability of pilot trial methods/findings to future definitive trial or other studies             | Yes/no                                          | To be reporting on the generalisability of the pilot trial methods/findings to the future definitive trial, we deemed it sufficient for the paper to be discussing whether the methods/findings of the pilot study can be applied to the future definitive trial. To be reporting on the generalisability of the pilot trial methods/findings to other future trials, we deemed it sufficient for the paper to be discussing whether the methods/findings of the pilot study can be applied to other future trials. |
| 38 | Interpretation of feasibility consistent with main feasibility objectives and findings                            | Yes/no                                          |                                                                                                                                                                                                                                                                                                                                                                                                                                                                                                                     |
| 39 | Reported implications for progression from the pilot to the future definitive trial                               | Yes/no                                          |                                                                                                                                                                                                                                                                                                                                                                                                                                                                                                                     |
| 40 | If yes, what were the implications?                                                                               | Proceed/<br>proceed with<br>changes/<br>Further |                                                                                                                                                                                                                                                                                                                                                                                                                                                                                                                     |
| 41 |                                                                                                                   |                                                 |                                                                                                                                                                                                                                                                                                                                                                                                                                                                                                                     |
| 42 |                                                                                                                   |                                                 |                                                                                                                                                                                                                                                                                                                                                                                                                                                                                                                     |
| 43 |                                                                                                                   |                                                 |                                                                                                                                                                                                                                                                                                                                                                                                                                                                                                                     |
| 44 |                                                                                                                   |                                                 |                                                                                                                                                                                                                                                                                                                                                                                                                                                                                                                     |
| 45 |                                                                                                                   |                                                 |                                                                                                                                                                                                                                                                                                                                                                                                                                                                                                                     |
| 46 |                                                                                                                   |                                                 |                                                                                                                                                                                                                                                                                                                                                                                                                                                                                                                     |
| 47 |                                                                                                                   |                                                 |                                                                                                                                                                                                                                                                                                                                                                                                                                                                                                                     |
| 48 |                                                                                                                   |                                                 |                                                                                                                                                                                                                                                                                                                                                                                                                                                                                                                     |
| 49 |                                                                                                                   |                                                 |                                                                                                                                                                                                                                                                                                                                                                                                                                                                                                                     |
| 50 |                                                                                                                   |                                                 |                                                                                                                                                                                                                                                                                                                                                                                                                                                                                                                     |
| 51 |                                                                                                                   |                                                 |                                                                                                                                                                                                                                                                                                                                                                                                                                                                                                                     |
| 52 |                                                                                                                   |                                                 |                                                                                                                                                                                                                                                                                                                                                                                                                                                                                                                     |
| 53 |                                                                                                                   |                                                 |                                                                                                                                                                                                                                                                                                                                                                                                                                                                                                                     |
| 54 |                                                                                                                   |                                                 |                                                                                                                                                                                                                                                                                                                                                                                                                                                                                                                     |
| 55 |                                                                                                                   |                                                 |                                                                                                                                                                                                                                                                                                                                                                                                                                                                                                                     |
| 56 |                                                                                                                   |                                                 |                                                                                                                                                                                                                                                                                                                                                                                                                                                                                                                     |
| 57 |                                                                                                                   |                                                 |                                                                                                                                                                                                                                                                                                                                                                                                                                                                                                                     |
| 58 |                                                                                                                   |                                                 |                                                                                                                                                                                                                                                                                                                                                                                                                                                                                                                     |
| 59 |                                                                                                                   |                                                 |                                                                                                                                                                                                                                                                                                                                                                                                                                                                                                                     |
| 60 |                                                                                                                   |                                                 |                                                                                                                                                                                                                                                                                                                                                                                                                                                                                                                     |

1  
2  
3  
4  
5  
6  
7  
8  
9  
10  
11  
12  
13  
14  
15  
16  
17  
18  
19  
20  
21  
22  
23  
24  
25  
26  
27  
28  
29  
30  
31  
32  
33  
34  
35  
36  
37  
38  
39  
40  
41  
42  
43  
44  
45  
46  
47  
48  
49  
50  
51  
52  
53  
54  
55  
56  
57  
58  
59  
60

|                                                              |                                                   |  |
|--------------------------------------------------------------|---------------------------------------------------|--|
|                                                              | research or piloting needed first/ Don't go ahead |  |
| Other information                                            |                                                   |  |
| Reported registration number for pilot trial                 | Yes/no                                            |  |
| Reported name of registry for pilot trial                    | Yes/no                                            |  |
| Reported where the pilot trial protocol can be accessed      | Yes/no                                            |  |
| Reported source of funding                                   | Yes/no                                            |  |
| Reported ethical approval/research review committee approval | Yes/no                                            |  |
| If yes, reported reference number                            | Yes/no                                            |  |

For peer review only

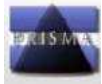

# PRISMA 2009 Checklist

1  
2  
3  
4  
5  
6  
7  
8  
9  
10  
11  
12  
13  
14  
15  
16  
17  
18  
19  
20  
21  
22  
23  
24  
25  
26  
27  
28  
29  
30  
31  
32  
33  
34  
35  
36  
37  
38  
39  
40  
41  
42  
43  
44  
45  
46  
47  
48  
49

| Section/topic                      | #  | Checklist item                                                                                                                                                                                                                                                                                              | Reported on page #                |
|------------------------------------|----|-------------------------------------------------------------------------------------------------------------------------------------------------------------------------------------------------------------------------------------------------------------------------------------------------------------|-----------------------------------|
| <b>TITLE</b>                       |    |                                                                                                                                                                                                                                                                                                             |                                   |
| Title                              | 1  | Identify the report as a systematic review, meta-analysis, or both.                                                                                                                                                                                                                                         | 1                                 |
| <b>ABSTRACT</b>                    |    |                                                                                                                                                                                                                                                                                                             |                                   |
| Structured summary                 | 2  | Provide a structured summary including, as applicable: background; objectives; data sources; study eligibility criteria, participants, and interventions; study appraisal and synthesis methods; results; limitations; conclusions and implications of key findings; systematic review registration number. | 1, 2                              |
| <b>INTRODUCTION</b>                |    |                                                                                                                                                                                                                                                                                                             |                                   |
| Rationale                          | 3  | Describe the rationale for the review in the context of what is already known.                                                                                                                                                                                                                              | 3                                 |
| Objectives                         | 4  | Provide an explicit statement of questions being addressed with reference to participants, interventions, comparisons, outcomes, and study design (PICOS).                                                                                                                                                  | 3                                 |
| <b>METHODS</b>                     |    |                                                                                                                                                                                                                                                                                                             |                                   |
| Protocol and registration          | 5  | Indicate if a review protocol exists, if and where it can be accessed (e.g., Web address), and, if available, provide registration information including registration number.                                                                                                                               | 5                                 |
| Eligibility criteria               | 6  | Specify study characteristics (e.g., PICOS, length of follow-up) and report characteristics (e.g., years considered, language, publication status) used as criteria for eligibility, giving rationale.                                                                                                      | 3, 4                              |
| Information sources                | 7  | Describe all information sources (e.g., databases with dates of coverage, contact with study authors to identify additional studies) in the search and date last searched.                                                                                                                                  | 4                                 |
| Search                             | 8  | Present full electronic search strategy for at least one database, including any limits used, such that it could be repeated.                                                                                                                                                                               | Appendix 1                        |
| Study selection                    | 9  | State the process for selecting studies (i.e., screening, eligibility, included in systematic review, and, if applicable, included in the meta-analysis).                                                                                                                                                   | 4                                 |
| Data collection process            | 10 | Describe method of data extraction from reports (e.g., piloted forms, independently, in duplicate) and any processes for obtaining and confirming data from investigators.                                                                                                                                  | 5, 6                              |
| Data items                         | 11 | List and define all variables for which data were sought (e.g., PICOS, funding sources) and any assumptions and simplifications made.                                                                                                                                                                       | Appendix 2                        |
| Risk of bias in individual studies | 12 | Describe methods used for assessing risk of bias of individual studies (including specification of whether this was done at the study or outcome level), and how this information is to be used in any data synthesis.                                                                                      | N/A – review of reporting quality |
| Summary measures                   | 13 | State the principal summary measures (e.g., risk ratio, difference in means).                                                                                                                                                                                                                               | N/A –                             |

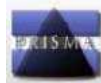

## PRISMA 2009 Checklist

Page 1 of 2

|                               |    |                                                                                                                                                                                                          | review of reporting quality       |
|-------------------------------|----|----------------------------------------------------------------------------------------------------------------------------------------------------------------------------------------------------------|-----------------------------------|
| Synthesis of results          | 14 | Describe the methods of handling data and combining results of studies, if done, including measures of consistency (e.g., $I^2$ ) for each meta-analysis.                                                | N/A – review of reporting quality |
| Page 1 of 2                   |    |                                                                                                                                                                                                          |                                   |
| Section/topic                 | #  | Checklist item                                                                                                                                                                                           | Reported on page #                |
| Risk of bias across studies   | 15 | Specify any assessment of risk of bias that may affect the cumulative evidence (e.g., publication bias, selective reporting within studies).                                                             | N/A – review of reporting quality |
| Additional analyses           | 16 | Describe methods of additional analyses (e.g., sensitivity or subgroup analyses, meta-regression), if done, indicating which were pre-specified.                                                         | N/A – review of reporting quality |
| <b>RESULTS</b>                |    |                                                                                                                                                                                                          |                                   |
| Study selection               | 17 | Give numbers of studies screened, assessed for eligibility, and included in the review, with reasons for exclusions at each stage, ideally with a flow diagram.                                          | 6, 7, Figure 1                    |
| Study characteristics         | 18 | For each study, present characteristics for which data were extracted (e.g., study size, PICOS, follow-up period) and provide the citations.                                                             | 7, Table 1, Appendix 3            |
| Risk of bias within studies   | 19 | Present data on risk of bias of each study and, if available, any outcome level assessment (see item 12).                                                                                                | N/A – review of reporting quality |
| Results of individual studies | 20 | For all outcomes considered (benefits or harms), present, for each study: (a) simple summary data for each intervention group (b) effect estimates and confidence intervals, ideally with a forest plot. | N/A – review of reporting         |

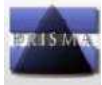

# PRISMA 2009 Checklist

1  
2  
3  
4  
5  
6  
7  
8  
9  
10  
11  
12  
13  
14  
15  
16  
17  
18  
19  
20  
21  
22  
23  
24  
25  
26  
27  
28  
29  
30  
31  
32  
33  
34  
35  
36  
37  
38  
39  
40  
41  
42  
43  
44  
45  
46  
47  
48  
49

|                             |    |                                                                                                                                                                                      |                                   |
|-----------------------------|----|--------------------------------------------------------------------------------------------------------------------------------------------------------------------------------------|-----------------------------------|
|                             |    |                                                                                                                                                                                      | quality                           |
| Synthesis of results        | 21 | Present results of each meta-analysis done, including confidence intervals and measures of consistency.                                                                              | N/A – review of reporting quality |
| Risk of bias across studies | 22 | Present results of any assessment of risk of bias across studies (see Item 15).                                                                                                      | N/A – review of reporting quality |
| Additional analysis         | 23 | Give results of additional analyses, if done (e.g., sensitivity or subgroup analyses, meta-regression [see Item 16]).                                                                | N/A – review of reporting quality |
| <b>DISCUSSION</b>           |    |                                                                                                                                                                                      |                                   |
| Summary of evidence         | 24 | Summarize the main findings including the strength of evidence for each main outcome; consider their relevance to key groups (e.g., healthcare providers, users, and policy makers). | 9, 10, 11                         |
| Limitations                 | 25 | Discuss limitations at study and outcome level (e.g., risk of bias), and at review-level (e.g., incomplete retrieval of identified research, reporting bias).                        | 12                                |
| Conclusions                 | 26 | Provide a general interpretation of the results in the context of other evidence, and implications for future research.                                                              | 11                                |
| <b>FUNDING</b>              |    |                                                                                                                                                                                      |                                   |
| Funding                     | 27 | Describe sources of funding for the systematic review and other support (e.g., supply of data); role of funders for the systematic review.                                           | 13                                |

From: Moher D, Liberati A, Tetzlaff J, Altman DG, The PRISMA Group (2009). Preferred Reporting Items for Systematic Reviews and Meta-Analyses: The PRISMA Statement. PLoS Med 6(6): e1000097. doi:10.1371/journal.pmed1000097

For more information, visit: [www.prisma-statement.org](http://www.prisma-statement.org).



# BMJ Open

## The Quality of Reporting of Pilot and Feasibility Cluster Randomised Trials: A Systematic Review

|                                 |                                                                                                                                                                                                                                  |
|---------------------------------|----------------------------------------------------------------------------------------------------------------------------------------------------------------------------------------------------------------------------------|
| Journal:                        | <i>BMJ Open</i>                                                                                                                                                                                                                  |
| Manuscript ID                   | bmjopen-2017-016970.R1                                                                                                                                                                                                           |
| Article Type:                   | Research                                                                                                                                                                                                                         |
| Date Submitted by the Author:   | 12-Jun-2017                                                                                                                                                                                                                      |
| Complete List of Authors:       | Chan, Claire; Barts & The London School of Medicine and Dentistry, Leyrat, Clémence; London School of Hygiene and Tropical Medicine Eldridge, Sandra; Queen Mary University of London, Centre for Primary Care and Public Health |
| <b>Primary Subject Heading</b>: | Research methods                                                                                                                                                                                                                 |
| Secondary Subject Heading:      | Medical publishing and peer review                                                                                                                                                                                               |
| Keywords:                       | PRIMARY CARE, STATISTICS & RESEARCH METHODS, EDUCATION & TRAINING (see Medical Education & Training)                                                                                                                             |
|                                 |                                                                                                                                                                                                                                  |

SCHOLARONE™  
Manuscripts

Peer review only

# The Quality of Reporting of Pilot and Feasibility Cluster Randomised Trials: A Systematic Review

Claire L Chan, Statistician <sup>1\*</sup>, Clémence Leyrat, Research Fellow in Statistics <sup>2</sup>, Sandra M Eldridge, Professor <sup>1</sup>

1 Centre for Primary Care and Public Health, Queen Mary University of London, London, UK, E1 2AB

2 Department of Medical Statistics, London School of Hygiene and Tropical Medicine, London, UK, WC1E 7HT

Corresponding author\*

Email: [c.l.chan@qmul.ac.uk](mailto:c.l.chan@qmul.ac.uk)

## ABSTRACT

**Background:** There are an increasing number of studies described as pilot and feasibility studies. Reporting is generally poor. These studies are particularly important when designing cluster randomised trials (CRTs).

**Objectives:** To systematically review the quality of reporting of pilot and feasibility CRTs. In particular, to assess (1) the number of pilot CRTs conducted between 01/01/2011 and 31/12/2014, (2) whether objectives and methods are appropriate and (3) reporting quality.

**Methods:** We searched PubMed (2011-2014) for CRTs with 'pilot' or 'feasibility' in the title or abstract; that were assessing some element of feasibility; and showing evidence the study was in preparation for a main effectiveness/efficacy trial. Quality assessment criteria were based on the Consolidated Standards of Reporting Trials (CONSORT) extensions for pilot trials and CRTs.

**Results:** Eighteen pilot CRTs were identified. Forty-four percent did not have feasibility as their primary objective, and many (50%) performed formal hypothesis testing for effectiveness/efficacy despite being underpowered. Most (83%) included 'pilot' or 'feasibility' in the title, and discussed implications for progression from the pilot to the future definitive trial (89%), but fewer reported reasons for the randomised pilot trial (39%), sample size rationale (44%), or progression criteria (17%). Most defined the cluster (100%), and number of clusters randomised (94%), but few reported

1  
2  
3 how the cluster design affected sample size (17%), whether consent was sought from clusters (11%),  
4 or who enrolled clusters (17%).  
5  
6  
7

8 **Conclusions:** That only 18 pilot CRTs were identified necessitates increased awareness of the  
9 importance of conducting and publishing pilot CRTs and improved reporting. Pilot CRTs should  
10 primarily be assessing feasibility, avoiding formal hypothesis testing for effectiveness/efficacy, and  
11 reporting reasons for the pilot, sample size rationale, and progression criteria, as well as enrolment  
12 of clusters, and how the cluster design affects design aspects. We recommend adherence to the  
13 CONSORT extensions for pilot trials and CRTs.  
14  
15  
16  
17  
18

#### 19 **Article summary**

##### 20 **Strengths and limitations of this study**

- 21 • We used a robust search and data extraction procedure, including validation of the  
22 screening/sifting process and double data extraction.
- 23 • We may have missed some studies, since our criteria excluded studies not including 'pilot'  
24 or 'feasibility' in the title or abstract, and those not clearly in preparation for a main trial.  
25  
26  
27  
28  
29  
30  
31  
32  
33  
34

#### 35 **BACKGROUND**

36  
37  
38  
39 In a cluster randomised trial (CRT) clusters, rather than individuals, are the units of randomisation. A  
40 cluster is a group (usually predefined) of one or more individuals. For example, clusters could be  
41 hospitals and the individuals, the patients within those hospitals. CRTs are often chosen for logistical  
42 reasons, prevention of contamination across individuals, or because the intervention is targeted at  
43 the cluster level. CRTs are useful for evaluating complex interventions. However, they have added  
44 complexity in terms of design, implementation, and analysis and so it is important to ensure that  
45 carrying out a CRT is feasible before conducting the future definitive trial.[1]  
46  
47  
48  
49  
50

51  
52 A feasibility study conducted in advance of a future definitive trial is a study designed to answer the  
53 question about whether the study can be done and whether one should proceed with it. A pilot  
54 study answers the same question but in such a study part or all of the future trial is carried out on a  
55 smaller scale.[2] Thus all pilot studies are also feasibility studies. Pilot studies can be randomised or  
56  
57  
58  
59  
60

1  
2  
3 non-randomised; for brevity we use the term pilot CRT throughout this paper to refer to a  
4 randomised study with a clustered design that is in preparation for a future definitive trial assessing  
5 effectiveness/efficacy.[3, 4] The focus of pilot trials is on investigating areas of uncertainty about the  
6 future definitive trial to see whether it is feasible to carry out, so the data, methods, and analysis are  
7 different from an effectiveness/efficacy trial. In particular, more data might be collected on items  
8 such as recruitment and retention to assess feasibility, methods may include specifying criteria to  
9 judge whether to proceed with the future definitive trial, and analysis is likely to be based on  
10 descriptive statistics since the study is not powered for formal hypothesis testing for  
11 effectiveness/efficacy.  
12

13  
14  
15  
16  
17  
18  
19 Arnold et al. highlight the importance of pilot studies being of high quality.[5] Good reporting quality  
20 is essential to show how the pilot has informed the future definitive trial as well as to allow readers  
21 to use the results in preparing for similar future trials. The number of pilot and feasibility studies in  
22 the literature is increasing. However, Arain et al. indicate that reporting of pilot studies is poor.[6]  
23 There are no previous reviews of the reporting quality of pilot CRTs, despite the extra complications  
24 arising from the clustered structure. The aim of this review is to reveal the quality of reporting of  
25 pilot CRTs published between 01/01/2011 and 31/12/2014. We extracted information to describe  
26 the sample of pilot CRTS and to assess quality, with quality criteria based on the Consolidated  
27 Standards of Reporting Trials (CONSORT) extension for CRTs,[7] and a CONSORT extension for pilot  
28 trials which SE and CC were involved in the final stages of development of during this review.[3, 4]  
29 We present recommendations for improving the conduct, analysis and reporting of these studies  
30 and expect this to improve the quality, usefulness and interpretation of pilot CRTs in the future. We  
31 know current reporting of CRTs is suboptimal,[8-11] and thus we expected the reporting of pilot  
32 CRTs to be even poorer.  
33  
34  
35  
36  
37  
38  
39  
40  
41  
42

43 The questions addressed by this review are:

- 44 1) How many pilot CRTs have been conducted between 01/01/2011 and 31/12/2014?
  - 45 2) Are pilot CRTs using appropriate objectives and methods?
  - 46 3) To what extent is the quality of reporting of pilot CRTs sufficient?
- 47  
48  
49  
50

## 51 **METHODS**

### 52 **Inclusion and exclusion criteria**

53  
54  
55  
56  
57  
58  
59  
60

1  
2  
3 We included papers published in English with a publication date (print or electronic) between  
4 01/01/2011 and 31/12/2014. We chose the start date to be after the updated CONSORT 2010 was  
5 published.[12] We estimated a search covering four years would give us a reasonable number of  
6 papers to perform our quality assessment, and that later papers would be similar in terms of quality  
7 of reporting since the CONSORT for pilot trials was not published until the end of 2016. The study  
8 had to be a CRT, have the word 'pilot' or 'feasibility' in the title or abstract, be assessing some  
9 element of feasibility, and show evidence that the study was in preparation for a specific trial  
10 assessing effectiveness/efficacy that is planned to go ahead if the pilot trial suggests it is feasible (i.e.  
11 not just a general assessment of feasibility issues to help researchers in general, although pilot trials  
12 may do this as an addition). Regardless of how authors described a study, we did not consider it to  
13 be a pilot trial if it was *only* looking at effectiveness/efficacy because we wanted to exclude those  
14 studies that claim to be a pilot/feasibility trial simply as justification for small sample size.[13] The  
15 paper had to be reporting results (i.e. not a protocol or statistical analysis plan) and had to be the  
16 first published paper reporting pilot outcomes (i.e. not an extension/follow-up study for a pilot study  
17 already reported, and not a second paper reporting further pilot outcomes). Interim analyses,  
18 analyses before the study was complete, and internal pilots were excluded; the CONSORT extension  
19 for pilot trials on which we based the quality assessment does not apply to internal pilots.[3, 4] No  
20 studies were excluded on the basis of quality since the aim was to assess the quality of reporting.  
21  
22  
23  
24  
25  
26  
27  
28  
29  
30  
31  
32  
33

#### 34 **Data sources and search methods**

35 We searched PubMed for relevant papers in September 2015. We searched for the words 'pilot' or  
36 'feasibility' in the title or abstract, a search strategy similar to that used by Lancaster et al. [14] We  
37 combined this with a search strategy to identify CRTs; this was similar to the strategy used by Diaz-  
38 Ordaz et al. [8] The full electronic search strategy is given in Appendix 1.  
39  
40  
41  
42  
43

#### 44 **Sifting and validation**

45 The titles and abstracts of all papers identified by the electronic search were screened by CC for  
46 possible inclusion. Full texts were obtained for those papers identified as definitely or possibly  
47 satisfying the inclusion criteria and sifted by CC for inclusion. As validation, CL carried out the same  
48 screening and sifting process independently on a 10% random sample of electronically identified  
49 papers. For full texts where there was uncertainty whether the paper should be included, it was  
50 referred to SE for a final decision.  
51  
52  
53  
54

#### 55 **Refining the inclusion process**

56  
57  
58  
59  
60

1  
2  
3 We refined the screening and sifting process following piloting. In particular we rejected a more  
4 restrictive PubMed search that required 'pilot' or 'feasibility' in the title rather than allowing these  
5 words to occur in the title or abstract because this missed relevant papers; we altered the order of  
6 the exclusion criteria to make the process more streamline; and we relaxed one inclusion criteria,  
7 requiring evidence that the pilot trial was in preparation for a future definitive trial rather than an  
8 explicit statement that authors were planning a future definitive trial. The protocol was updated,  
9 and is available from the corresponding author.  
10  
11  
12  
13

#### 14 **Data Extraction**

15  
16 CC and CL independently extracted data from all papers selected for inclusion in the review, and  
17 followed rules on what to extract (see Further information column of Appendix 2). Extracted data  
18 were recorded in an Excel spreadsheet. Discrepancies were resolved by discussion between CC and  
19 CL, and where agreement could not be reached a final decision was made by SE.  
20  
21  
22  
23

24  
25 For each pilot CRT included in the review, we extracted information to describe the trials, including  
26 publication date (print date unless there was an earlier electronic date), country in which the trial  
27 was set, number of clusters randomised, method of cluster randomisation and, following the  
28 CONSORT extension for pilot trials' recommendation to focus on objectives rather than outcomes,  
29 the primary objective. We defined the primary objective using method similar to that used by Diaz-  
30 Ordaz *et al.*[8] for primary outcomes i.e. as that specified by the author, else the objective used in  
31 the sample size justification, or else the first objective mentioned in the abstract or else main text.  
32  
33  
34  
35  
36  
37

38 To assess whether the pilot trials were using appropriate objectives and methods, we collected  
39 information on whether the primary objective was about feasibility, the method used to address the  
40 main feasibility objective, the rationale for numbers in the pilot trial, and whether there was formal  
41 hypothesis testing for, or statements about, effectiveness/efficacy without a caveat about the small  
42 sample size.  
43  
44  
45  
46  
47

48 To assess reporting quality, we created a list of quality assessment items based on the CONSORT  
49 extension for pilot trials.[3, 4] We also looked at the CONSORT extension for CRTs,[7] and  
50 incorporated any cluster-specific items into our quality assessment items. Where a CRT item became  
51 less relevant in the context of a pilot trial, we did not extract it (e.g. whether variation in cluster sizes  
52 was formally considered in the sample size calculation). In addition, where there was a substantial  
53 difference between the item for the CONSORT extension for CRTs and that for the pilot trial  
54  
55  
56  
57  
58  
59  
60

1  
2  
3 extension and the items were not compatible, we used the latter item (e.g. focusing on objectives  
4 rather than outcomes). We recognised the need to balance comprehensiveness and feasibility.[11]  
5  
6 Therefore, where items referred to objectives or methods, we extracted this for the primary  
7  
8 objective only. We also did not extract on whether papers reported a structured summary of trial  
9  
10 design, methods, results, and conclusions. The final version of the full list of data extracted, and  
11  
12 further information on each item extracted, is included in Appendix 2.

### 13 14 **Refining data extraction**

15  
16 Initially CC extracted data on a random 10% sample of papers. However, some of the items were  
17  
18 difficult to extract in a clear, standardised way, as similarly noted by Ivers et al,[11] so these items  
19  
20 were removed. In particular: whether the objectives, intervention, or allocation concealment were  
21  
22 at the individual level, cluster level, or both; and other analyses performed or other unintended  
23  
24 consequences (difficult to decipher from papers whether it classified as an 'other'). Furthermore,  
25  
26 some items were deemed easier to extract if split into two items, for example; 'reported why the  
27  
28 pilot trial ended/stopped' which we subsequently split into 'reported the pilot trial ended/stopped'  
29  
30 and 'if so, what was the reason'.

### 31 **Analysis**

32  
33  
34 Data were analysed using Excel version 2013. We describe the characteristics of the pilot CRTs using  
35  
36 descriptive statistics. Where we extracted text, we established categories during analysis by  
37  
38 grouping similar data, for example grouping the different primary objectives. To assess adherence to  
39  
40 the CONSORT checklists, we present the number and percentage reporting each item. This report  
41  
42 adheres, where appropriate, to the Preferred Reporting Items for Systematic reviews and Meta-  
43  
44 Analyses (PRISMA) statement.[15]

### 45 **Patient involvement**

46  
47  
48 No patients were involved in the development of the research question, design or conduct of the  
49  
50 study, interpretation or reporting. No patients were recruited for this study. There are no plans to  
51  
52 disseminate results of the research to study participants.

## 53 54 55 **RESULTS**

1  
2  
3 The electronic PubMed search identified 257 published papers. We rejected 108 during screening  
4 (29 not reporting results; 32 not about a single randomised trial; 46 not cluster randomised; 1  
5 interim analysis). The remaining 149 full-text articles were assessed for eligibility, and 131 more  
6 papers were rejected (1 not reporting results; 13 not about a single randomised trial; 25 not cluster  
7 randomised; 8 analyses before study complete/internal pilot; 32 not assessing feasibility; 50 not in  
8 preparation for a future definitive effectiveness/efficacy trial; 2 not the first published paper  
9 reporting pilot outcomes). This left 18 studies to be included in the analysis.[A1-A18]. The full list of  
10 studies is included in Table 1, with citations in Appendix 3. Figure 1 shows the flow diagram of the  
11 identification process for the sample of 18 pilot CRTs.  
12  
13  
14  
15  
16  
17  
18

19 There was 96% agreement between CC and CL for the 10% random sample used for the screening  
20 and sifting validation (based on 26 papers), with a kappa coefficient of 0.84.  
21  
22  
23

#### 24 **Trial characteristics**

25 In general, the more recent the publication date, the more pilot CRTs were identified, but with the  
26 most identified in 2013 (Table 2). Of the 18 included studies, the majority (56%) were set in the UK.  
27 All other countries were represented only once except for Canada (3 trials) and USA (2 trials). Of  
28 those reporting the method of randomisation, the majority (69%) used stratified with blocked  
29 randomisation. The median number of clusters randomised was 8 (IQR: 4 to 16) with a range from 2  
30 to 50.  
31  
32  
33  
34  
35  
36

#### 37 **Pilot trial objectives and methods**

38 Ten (56%) of the 18 included pilot trials had feasibility as their primary objective, for example  
39 assessing feasibility of implementing the intervention (6 trials), of recruitment and retention (3  
40 trials), and of the cluster design (1 trial) (Table 3). All ten trials reported a corresponding measure to  
41 assess the feasibility objective; most (90%) used descriptive statistics and/or qualitative methods to  
42 address the objective. In one trial a statistical test was used to address their primary feasibility  
43 objective without the authors designing the study to be adequately powered to do so.  
44  
45  
46  
47  
48  
49

50 The remaining eight trials had an effectiveness/efficacy primary objective, and used statistical tests  
51 to address this. Nevertheless these eight trials all had feasibility as one of their other objectives (this  
52 was an inclusion criterion). The feasibility objectives were similar to those where the feasibility was  
53 primary, but expressed more generally in two trials, for example, looking at the feasibility of the  
54 future definitive trial,[A16] and looking at whether the future definitive trial could answer the  
55  
56  
57  
58  
59  
60



1  
2  
3 effectiveness question and which study design would enable this.[A10] In only three trials was a  
4 measure to assess the feasibility objective reported, using either quantitative or qualitative  
5 measures.  
6  
7

8  
9 Eight trials reported a rationale for the numbers in the pilot trial, with all of these following best  
10 practice in not basing the rationale on a formal sample size calculation for effectiveness/efficacy.  
11 Nine (50%) trials performed any formal hypothesis testing for effectiveness/efficacy, regardless of  
12 whether this was for the primary or a secondary objective. Of these nine trials, four of the  
13 conclusions about effectiveness/efficacy were made without any caveats about the imprecision of  
14 estimates or possible lack of representativeness because of the small samples.  
15  
16  
17  
18

### 19 20 21 **Quality of reporting – by items**

22 The pilot CRTs in our review are published after the CONSORT 2010 for RCTs but before the  
23 CONSORT extension for pilot trials. Therefore, to present data on quality of reporting, we looked at  
24 our list of quality assessment items based on the CONSORT extension for pilot trials, and grouped  
25 reporting items into three categories (Table 4): (1) items in the CONSORT extension for pilot trials  
26 that are new compared to CONSORT 2010 for RCTs, (2) items in the CONSORT extension for pilot  
27 trials that are substantially adapted from CONSORT 2010 for RCTs and (3) items in the CONSORT  
28 extension for pilot trials that are the same as or have only minor differences from CONSORT 2010 for  
29 RCTs, plus items in the CONSORT extension for CRTs.[3, 4, 7, 12]  
30  
31  
32  
33  
34  
35  
36

37 In the tables, denominators for proportions are based on papers for which the item is relevant. Not  
38 all items are relevant for all trials, due to their design, so we highlight where this applies in the table  
39 footnotes.  
40  
41  
42

#### 43 44 **New items**

45  
46 Five new items were added to the CONSORT extension for pilot trials on the identification and  
47 consent process, progression criteria, other unintended consequences, implications for progression,  
48 and ethical approval.[3, 4] In our review, how participants were identified and consented was  
49 reported by 50% and 76% of the pilot CRTs, respectively, but how clusters were identified and  
50 consented was reported by just 33% and 11%, respectively. Only 3 trials (17%) reported criteria used  
51 to judge whether or how to proceed with the future definitive trial, with two giving numbers that  
52 must be exceeded such as recruitment, retention, attendance, and data collection percentages,[A17,  
53  
54  
55  
56  
57  
58  
59  
60

1  
2  
3 A2] and one giving categories of “definitely feasible”, “possibly feasible”, and “not feasible”.[A12]  
4  
5 The item on other unintended consequences was reported by none of the pilot CRTs, although it is  
6  
7 unclear whether this is due to poor reporting or because no unintended consequences occurred.  
8  
9 Implications for progression from pilot to future definitive trial was reported by 16 trials (89%), with  
10  
11 nine reporting to proceed/proceed with changes, five reporting further research or piloting is  
12  
13 needed first, and two reporting to not go ahead with the future definitive trial. 94% reported ethical  
14  
15 approval/research review committee approval, but only 47% of them also reported the  
16  
17 corresponding reference number.

#### 18 Substantially adapted items

19  
20  
21 Six items in the CONSORT extension for pilot trials were substantially adapted from CONSORT 2010  
22  
23 for RCTs, regarding reasons for the randomised pilot trial, sample size rationale for the pilot trial,  
24  
25 numbers approached and/or assessed for eligibility, remaining uncertainty about feasibility,  
26  
27 generalisability of pilot trial methods and findings, and where the pilot trial protocol can be  
28  
29 accessed.[3, 4] Reasons for the randomised pilot trial were reported by 39% of the pilot CRTs. Eight  
30  
31 trials (44%) gave a rationale for the sample size of the pilot trial. Pilot trials should always report a  
32  
33 rationale for their sample size; this can be qualitative or quantitative, but shouldn't be based on a  
34  
35 formal sample size calculation for effectiveness/efficacy. In this review, the rationales were based on  
36  
37 logistics,[A15] resources,[A14] time,[A16] a balance of practicalities and need for reasonable  
38  
39 precision,[A18] a general statement that it was considered sufficient to address the objectives of the  
40  
41 pilot trial,[A17] formal [A6] and non-formal [A7] calculation to enable estimation of parameters in  
42  
43 the future definitive trial, and a formal calculation based on the primary feasibility outcome.[A12] Of  
44  
45 these rationales, good examples include “The decision to include eight apartment-sharing  
46  
47 communities was based on practical feasibility that seemed appropriate according to funding and  
48  
49 the personal resources available”,[A14] as well as “The sample size was chosen in order to have two  
50  
51 clusters per randomized treatment and the number of participants per cluster was based on the  
52  
53 number of degrees of freedom needed within each cluster to have reasonable precision to estimate  
54  
55 a variance”. [A6] The number of individuals approached and/or assessed for eligibility was reported  
56  
57 by 47%, and the number of clusters by 56%. Remaining uncertainty was reported by 56% of the pilot  
58  
59 CRTs. 89% reported generalisability of pilot trial methods/findings to the future definitive trial or  
60  
other studies, but clarity of reporting was lacking as it was difficult to distinguish between references  
to the future definitive trial versus other future studies due to ambiguous phrases such as “in a  
future trial”. Only 39% reported where the pilot trial protocol could be accessed.

1  
2  
3  
4  
5  
6  
7  
8  
9  
10  
11  
12  
13  
14  
15  
16  
17  
18  
19  
20  
21  
22  
23  
24  
25  
26  
27  
28  
29  
30  
31  
32  
33  
34  
35  
36  
37  
38  
39  
40  
41  
42  
43  
44  
45  
46  
47  
48  
49  
50  
51  
52  
53  
54  
55  
56  
57  
58  
59  
60

Items essentially taken from CONSORT 2010 for RCTs or the CONSORT extension for CRTs

For the remaining items, reporting quality was variable. Some were reported by fewer than 20% of the pilot CRTs, for example considering the cluster design in the sample size rationale for the pilot trial (17%), reporting whether consent was sought from clusters (11%) and who enrolled them (17%), how people were blinded (7% of applicable trials), number of excluded individuals (6% of applicable trials) and clusters (18% of applicable trials) after randomisation, and a table showing baseline cluster characteristics (11%). Those reported most well, by more than 80% of the pilot CRTs, included reporting 'pilot' or 'feasibility' in the title (83%), scientific background and explanation of rationale for future definitive trial (100%), pilot trial design (100%), nature of the cluster (100%), settings and locations where the data were collected (100%), whether consent was sought from participants (94%), number of clusters randomised (94%) and assessed for primary objective (82% of applicable trials), number of individuals assessed for primary objective (94% of applicable trials), limitations of pilot trial (94%), and source of funding (100%).

### **Quality of reporting – by study**

Finally, in Table 5 we present the number (percentage) of quality assessment items reported by each study. We provide an overall score, as well as a score by categories of CONSORT. The quality of reporting varies across studies, with 5 of the pilot CRTs reporting over 65% of the quality assessment items and 2 of the pilot CRTs reporting under 30%. There does not appear to be a trend of reporting quality with time. Five of the studies report 90% or more of the quality assessment items in the 'discussion and other information' category, and only two studies report less than 50%. Two of the studies report 100% of the items in the 'title and abstract and introduction' category, and five studies report less than 50%. The highest percentage of items reported by a study in the 'methods' category is 66% and the lowest is 14%. Similarly, the highest percentage of items reported by a study in the 'results' category is 78% and the lowest is 18%. Within studies, the category that is best reported tends to be the 'discussion and other information' category (had the highest percentage for 10 of the 18 pilot CRTs).

## **DISCUSSION**

### **Main findings**

1  
2  
3 This is the first study to assess the reporting quality of pilot CRTs using the recently developed  
4 CONSORT checklist for pilot trials.[3, 4] Our search strategy and inclusion criteria identified 18 pilot  
5 CRTs published between 2011 and 2014. Most studies were published in the UK, perhaps driven by  
6 the availability of funding or the large number of CRTs and interest in complex interventions in the  
7 UK.  
8  
9

10  
11  
12 With respect to the pilot CRT objectives and methods, a considerable proportion of papers did not  
13 have feasibility as their primary objective. Of the trials reporting a sample size rationale for the pilot,  
14 all followed best practice in not carrying out a formal sample size calculation for  
15 effectiveness/efficacy, yet a substantial proportion performed formal hypothesis testing for  
16 effectiveness/efficacy. This could indicate an inappropriate attachment to hypothesis testing,  
17 although many did explain it was an indication of *potential* effectiveness or that the study was  
18 underpowered. Investigators wanting to assess effectiveness/efficacy and use statistical tests to do  
19 so should be performing a properly powered definitive trial, otherwise there is the potential for  
20 misleading conclusions affecting clinical decisions as well as misinformed decisions about the future  
21 definitive trial.[16] One may however look at *potential* effectiveness, for example using an interim or  
22 surrogate outcome, with a caveat about the lack of power.[3, 4] Moreover, one may include a  
23 progression criterion based on potential effect. If so, Eldridge and Kerry recommend any  
24 interpretation of potential effect is done by looking at the limits of the confidence interval,[13] and  
25 one should also pay attention to features of the pilot which might have biased the result (for  
26 example, convenience sampling of clusters). A positive effect finding excluding the null value would  
27 still justify the future definitive trial to estimate the effect with greater certainty, but a negative  
28 effect finding excluding the null value (i.e. strongly suggesting harm), or even a finding where the  
29 clinically important difference is excluded, might suggest not proceeding. It is good practice to pre-  
30 state such progression criteria. Finally, one may use estimates from outcome data, for example, as  
31 inputs for the sample size calculation for the future definitive trial. In particular, for pilot CRTs we  
32 may be interested in estimating the intra-cluster correlation coefficient (ICC), although we note that  
33 the ICC estimate from a pilot CRT should not be the only source for the future definitive trial sample  
34 size, because of the large amount of imprecision in a pilot trial.[17] Reporting quality of pilot CRTs  
35 was variable. Items reported well included reporting the term 'pilot' or 'feasibility' in the title,  
36 generalisability of pilot trial methods/findings to the future definitive trial or other studies, and  
37 implications for progression from the pilot to the future definitive trial, although clarity could be  
38 improved when referring to the future definitive trial rather than other future studies in general.  
39 Items least well reported included reasons for the randomised pilot trial, sample size rationale for  
40  
41  
42  
43  
44  
45  
46  
47  
48  
49  
50  
51  
52  
53  
54  
55  
56  
57  
58  
59  
60

1  
2  
3 the pilot trial, criteria used to judge whether or how to proceed with the future definitive trial, and  
4 where the pilot trial protocol can be accessed. These items are important so that readers can  
5 understand whether the uncertainty they are facing about their future trial has already been  
6 addressed in a pilot, researchers can make sure they have enough patients to achieve the pilot trial  
7 objectives, readers can understand the criteria for progression, and to prevent against selective  
8 reporting.  
9  
10

11  
12  
13  
14 For items related to the cluster aspect of pilot CRTs, most pilot CRTs reported the nature of the  
15 cluster, and the number of clusters randomised and assessed for the primary objective. The items  
16 reported least well included considering the cluster design during the sample size rationale for the  
17 pilot trial, reporting who enrolled clusters and how they were consented, number of exclusions for  
18 clusters after randomisation, and a table showing baseline cluster characteristics. Although the  
19 number of clusters in a pilot trial is usually small it is still important to, for example, describe the  
20 cluster-level characteristics using a baseline table as it may give helpful information important for  
21 planning the future definitive trial. Moreover, while nearly all trial reports described whether  
22 consent was sought from individuals or not, seeking agreement from clusters was only described in a  
23 small minority. The items on agreement from and enrolment of clusters, baseline cluster  
24 characteristics, and number of excluded clusters are particularly important to report, since they may  
25 affect assessment of feasibility.  
26  
27  
28  
29  
30  
31  
32  
33

34  
35  
36 If we consider why some items may have been well adhered to and others not, it is interesting to  
37 observe that new items added to the CONSORT extension for pilot trials and items substantially  
38 adapted from CONSORT 2010 for RCTs were in general not well adhered to. This could perhaps be  
39 because of somewhat newer ideas that may not have been considered during design such as  
40 specifying progression criteria and considering a rationale for numbers in the pilot. Alternatively,  
41 perhaps there were aspects sometimes done but not reported due to lack of reporting guidance to  
42 remind authors; for example, the new items on how clusters were identified and consented, other  
43 unintended consequences, and ethical approval/research review committee approval reference  
44 number, and the substantially adapted items on reporting reasons for the pilot trial, number of  
45 individuals approached and/or assessed for eligibility, and where the pilot trial protocol can be  
46 accessed. With the item on unintended consequences, we recognise that investigators are free to  
47 choose what they interpret and report as an unintended consequence. We recommend careful  
48 thought that all unintended consequences that may affect the future definitive trial are reported. It  
49 is also interesting to observe that many of the most poorly reported items concerned  
50  
51  
52  
53  
54  
55  
56  
57  
58  
59  
60

1  
2  
3 methods/design (progression criteria; enrolment and consent of clusters), and in particular,  
4 justification of design aspects (reasons for randomised pilot trial; sample size rationale for pilot trial  
5 including consideration of cluster design). Within studies, the category that is worst reported is the  
6 methods, despite being crucial to allow the reader to judge the quality of the trial.  
7  
8  
9

### 10 11 **Comparison with other studies**

12 There has not been a previous review of pilot trials using the new CONSORT extension for these  
13 trials.[3, 4] However, the review by Arain et al. looking at pilot and feasibility studies reported that  
14 81% were performing hypothesis testing with sample sizes known to be insufficient,[6] compared to  
15 50% of pilot CRTs in our review. Arain et al. also reported 36% of studies performing sample size  
16 calculations for the pilot. In our review, 17% performed calculations (all based on feasibility  
17 objectives), but if we include those that also correctly reported a rationale for the numbers in the  
18 pilot but without any calculation then this was 44%.  
19  
20  
21  
22  
23

24  
25  
26 The general message that reporting of CRTs is suboptimal still holds.[8-11] The review by Diaz-Ordaz  
27 et al. (2013) of definitive trial CRTs reported that 37% presented a table showing baseline cluster  
28 characteristics, compared to 11% of pilot CRTs in our review. Diaz-Ordaz et al. (2013) also reported  
29 that 27% accounted for clustering in sample size calculations,[8] and a recent review by Fiero et al.  
30 reported 53%.[10] However, just 17% of pilot CRTs in our review considered the cluster design in the  
31 sample size rationale for the pilot trial. Both these CRT reviews reviewed effectiveness/efficacy CRTs,  
32 for which the need to take account of clustering in sample sizes is generally well understood  
33 compared to pilot trials. In pilot trials the rationale for considering the clustered design in deciding  
34 on numbers in the pilot may be different, for example, considering the number of degrees of  
35 freedom needed within each cluster to estimate a variance.[A6] In pilot trials, including a number of  
36 clusters with different characteristics may also be important to get an idea about the  
37 implementation of an intervention across different clusters.  
38  
39  
40  
41  
42  
43  
44  
45

### 46 47 **Strengths and limitations**

48 We used a robust search and data extraction procedure, including validation of the screening/sifting  
49 process and double data extraction. However, the use of only one database, PubMed, which is  
50 comprehensive but not exhaustive, may have missed eligible papers, and the use of conditions #3,  
51 #5, and #6 (see Appendix 1) may have been restrictive. Our aim was to get a general idea of  
52 reporting issues in the area, though, rather than doing a completely comprehensive search. Our  
53 inclusion criteria stipulated that papers must have the word 'pilot' or 'feasibility' in the title or  
54  
55  
56  
57  
58  
59  
60

1  
2  
3 abstract, so we may have missed some pilot CRTs and thus may have overestimated the percentage  
4 reporting 'pilot' or 'feasibility' in the title. This strategy may also have resulted in a skewed sample of  
5 papers with a greater tendency to adhere to CONSORT guidelines. However, our review suggests  
6 reporting of pilot CRTs need improving, so our conclusion would remain the same. We required  
7 authors to report that the trial was in preparation for a future definitive trial, so we expect that  
8 items related to the future definitive trial (e.g. progression criteria, generalisability, implications)  
9 may be better reported than they would for all publications of pilot CRTs which might include papers  
10 that did not report that they were in preparation for a future definitive trial clearly enough to be  
11 included. During sifting, we identified 32 trials that had 'pilot' or 'feasibility' in the title/abstract, but  
12 were not assessing feasibility. A third of these were identified because they referred to 'pilot' or  
13 'feasibility' at some point in the abstract but it was not in reference to the current trial (e.g. stating  
14 feasibility has already been shown), but the other two thirds were labelled as a pilot or feasibility  
15 trial yet showed no evidence of assessing feasibility and were only assessing effectiveness. This is an  
16 important point as our review may appear to overestimate reporting quality by not including these  
17 studies. That there are underpowered main trials being published as pilot or feasibility studies is  
18 something that the academic community should look to prevent. During sifting, we also identified 50  
19 trials that were assessing feasibility but did not show evidence of being in preparation for a future  
20 definitive trial. Most were assessing the feasibility of implementing an intervention targeted at  
21 members of the public, or discussing feasibility of the intervention with the aim of providing  
22 information to help researchers wanting to implement a similar intervention in similar settings or to  
23 raise questions for future research, rather than being in preparation for a trial assessing  
24 effectiveness/efficacy. Some of these 50 trials also appeared to be small effectiveness studies  
25 labelled as a pilot, usually only mentioning feasibility once or twice throughout the paper, with one  
26 trial explicitly stating that "Because of organizational changes... we had to stop the inclusion after 46  
27 participants, and the study is consequently defined as a pilot study." [18] For the few trials that were  
28 potentially pilot CRTs not reported clearly enough, authors only spoke of future studies in general  
29 rather than clearly specifying the study was in preparation for a specific future definitive trial.  
30 Related to this, it is of interest to know the proportion of our 18 pilot CRTs that are actually followed  
31 by a future definitive trial, and we plan to investigate this in future.

## 51 CONCLUSION

52  
53  
54  
55 We may have overestimated the reporting quality of pilot CRTs; nevertheless our review  
56 demonstrates that reporting of pilot CRTs need improving. The identification of just 18 pilot CRTs  
57  
58  
59  
60

1  
2  
3 between 2011 and 2014, mainly from the UK, highlights the need for increased awareness of the  
4 importance of carrying out and publishing pilot CRTs and good reporting so that these studies can be  
5 identified. Pilot CRTs should primarily be assessing feasibility, and avoiding formal hypothesis testing  
6 for effectiveness/efficacy. Improvement is needed in reporting reasons for the pilot, rationale for the  
7 pilot trial sample size, and progression criteria, as well as the enrolment stage of clusters and how  
8 the cluster design affects aspects of design such as numbers of participants. We recommend  
9 adherence to the new CONSORT extension for pilot trials, in conjunction with the CONSORT  
10 extension for CRTs.[3, 4, 7] We encourage journals to endorse the CONSORT statement, including  
11 extensions.  
12  
13  
14  
15  
16  
17  
18  
19  
20

#### 21 **CONTRIBUTORS:**

22 SE conceived the study and advised on the design and protocol. CC developed the design of the study, wrote  
23 the protocol, and designed the screening/sifting and data extraction sheet. CC performed screening and sifting  
24 on all papers identified by the electronic search, and CL carried out validation of the screening/sifting process.  
25 CC and CL performed independent data extraction on all papers included in the review. CC conducted the  
26 analyses of the data and took primary responsibility for writing the manuscript. All authors provided feedback  
27 on all versions of the paper. All authors read and approved the final manuscript. CC is the study guarantor.  
28  
29  
30  
31

#### 32 **COMPETING INTEREST STATEMENT:**

33 All authors have completed the ICMJE uniform disclosure form at [www.icmje.org/coi\\_disclosure.pdf](http://www.icmje.org/coi_disclosure.pdf) and  
34 declare that CC was funded by an NIHR Research Methods Fellowship during this project, and that SE and CC  
35 are authors on the new CONSORT extension for pilot trials.  
36  
37  
38  
39

#### 40 **EXCLUSIVE LICENSE:**

41 The Corresponding Author has the right to grant on behalf of all authors and does grant on behalf of all  
42 authors, an exclusive licence on a worldwide basis to the BMJ Publishing Group Ltd and its Licensees to permit  
43 this article (if accepted) to be published in BMJ Open and any other BMJ PGL products to exploit all subsidiary  
44 rights, as set out in the licence <http://journals.bmj.com/site/authors/editorial-policies.xhtml#copyright> and  
45 the Corresponding Author accepts and understands that any supply made under these terms is made by  
46 BMJ PGL to the Corresponding Author. All articles published in BMJ Open will be made available on an Open  
47 Access basis (with authors being asked to pay an open access fee - see  
48 <http://bmjopen.bmj.com/site/about/resources.xhtml>) Access shall be governed by a Creative Commons  
49 licence – details as to which [Creative Commons](http://creativecommons.org/licenses/by/4.0/) licence will apply to the article are set out in the licence  
50 referred to above.  
51  
52  
53  
54  
55  
56

#### 57 **FUNDING:**



1  
2  
3 Claire Chan (nee Coleman) was funded by a National Institute for Health Research (NIHR) Research Methods  
4 Fellowship. This article presents independent research funded by the NIHR. The views expressed are those of  
5 the authors and not necessarily those of the NHS, the NIHR or the Department of Health. The funder played no  
6 role in the study.  
7  
8  
9

10 **ETHICAL APPROVAL:**

11 No ethics approval was necessary because this is a review of published literature. No patient data were used in  
12 this manuscript.  
13

14 **DATA SHARING STATEMENT:**

15  
16  
17 Extraction data are available from the corresponding author.  
18  
19

20 **TRANSPARENCY DECLARATION:**

21 This manuscript is an honest, accurate, and transparent account of the study being reported. No important  
22 aspects of the study have been omitted, and any discrepancies from the study as planned have been  
23 explained.  
24  
25  
26  
27  
28  
29  
30  
31  
32  
33  
34  
35  
36  
37  
38  
39  
40  
41  
42  
43  
44  
45  
46  
47  
48  
49  
50  
51  
52  
53  
54  
55  
56  
57  
58  
59  
60

## REFERENCES

1. Eldridge SM, Ashby D, Feder GS, Rudnicka AR, Ukoumunne OC. Lessons for cluster randomized trials in the twenty-first century: a systematic review of trials in primary care. *Clin Trials*. 2004;1(1):80-90.
2. Eldridge SM, Lancaster GA, Campbell MJ, Thabane L, Hopewell S, Coleman CL, et al. Defining Feasibility and Pilot Studies in Preparation for Randomised Controlled Trials: Development of a Conceptual Framework. *PloS one*. 2016;11(3):e0150205.
3. Eldridge SM, Chan CL, Campbell MJ, Bond CM, Hopewell S, Thabane L, et al. CONSORT 2010 statement: extension to randomised pilot and feasibility trials. *Pilot and Feasibility Studies*. 2016;2(1):64.
4. Eldridge SM, Chan CL, Campbell MJ, Bond CM, Hopewell S, Thabane L, et al. CONSORT 2010 statement: extension to randomised pilot and feasibility trials. *BMJ*. 2016;355(i5239).
5. Arnold DM, Burns KE, Adhikari NK, Kho ME, Meade MO, Cook DJ. The design and interpretation of pilot trials in clinical research in critical care. *Crit Care Med*. 2009;37(1 Suppl):S69-74.
6. Arain M, Campbell MJ, Cooper CL, Lancaster GA. What is a pilot or feasibility study? A review of current practice and editorial policy. *BMC Med Res Methodol*. 2010;10:67.
7. Campbell MK, Piaggio G, Elbourne DR, Altman DG. Consort 2010 statement: extension to cluster randomised trials. *BMJ : British Medical Journal*. 2012;345.
8. Diaz-Ordaz K, Froud R, Sheehan B, Eldridge S. A systematic review of cluster randomised trials in residential facilities for older people suggests how to improve quality. *BMC Med Res Methodol*. 2013;13:127.
9. Díaz-Ordaz K, Kenward MG, Cohen A, Coleman CL, Eldridge S. Are missing data adequately handled in cluster randomised trials? A systematic review and guidelines. *Clinical Trials*. 2014;11(5):590-600.
10. Fiero MH, Huang S, Oren E, Bell ML. Statistical analysis and handling of missing data in cluster randomized trials: a systematic review. *Trials*. 2016;17(1):1.
11. Ivers N, Taljaard M, Dixon S, Bennett C, McRae A, Taleban J, et al. Impact of CONSORT extension for cluster randomised trials on quality of reporting and study methodology: review of random sample of 300 trials, 2000-8. *BMJ*. 2011;343:d5886.
12. Moher D, Hopewell S, Schulz KF, Montori V, Gøtzsche PC, Devereaux PJ, et al. CONSORT 2010 Explanation and Elaboration: updated guidelines for reporting parallel group randomised trials. *BMJ*. 2010;340.
13. Eldridge S, Kerry S. *A Practical Guide to Cluster Randomised Trials in Health Services Research*: Wiley; 2012.
14. Lancaster GA, Dodd S, Williamson PR. Design and analysis of pilot studies: recommendations for good practice. *J Eval Clin Pract*. 2004;10(2):307-12.
15. Moher D, Liberati A, Tetzlaff J, Altman DG. Preferred reporting items for systematic reviews and meta-analyses: the PRISMA statement. *Ann Intern Med*. 2009;151(4):264-9, w64.
16. Kistin C, Silverstein M. Pilot studies: A critical but potentially misused component of interventional research. *JAMA*. 2015;314(15):1561-2.
17. Eldridge SM, Costelloe CE, Kahan BC, Lancaster GA, Kerry SM. How big should the pilot study for my cluster randomised trial be? *Statistical methods in medical research*. 2015:0962280215588242.
18. Mikkelsen LR, Mikkelsen SS, Christensen FB. Early, intensified home-based exercise after total hip replacement--a pilot study. *Physiother Res Int*. 2012;17(4):214-26.

## TABLES

Table 1: Pilot CRTs included in this review

| Author       | Year* | Journal                                                             | Title                                                                                                                                                                   | Cluster                                                             |
|--------------|-------|---------------------------------------------------------------------|-------------------------------------------------------------------------------------------------------------------------------------------------------------------------|---------------------------------------------------------------------|
| Begh [A1]    | 2011  | Trials                                                              | Promoting smoking cessation in Pakistani and Bangladeshi men in the UK: pilot cluster randomised controlled trial of trained community outreach workers                 | Census lower layer super output areas                               |
| Jones [A2]   | 2011  | Pediatric Exercise Science                                          | Promoting fundamental movement skill development and physical activity in early childhood settings: a cluster randomized controlled trial.                              | Childcare centers                                                   |
| Légaré [A3]  | 2010  | Health Expectations                                                 | Training family physicians in shared decision making for the use of antibiotics for acute respiratory infections: a pilot clustered randomized controlled trial.        | Family medicine groups                                              |
| Hopkins [A4] | 2012  | Health Education Research                                           | Implementing organizational physical activity and healthy eating strategies on paid time: process evaluation of the UCLA WORKING pilot study                            | Worksites - health and human service organizations                  |
| Jago [A5]    | 2012  | International Journal of Behavioral Nutrition and Physical Activity | Bristol girls dance project feasibility trial: outcome and process evaluation results                                                                                   | Secondary schools                                                   |
| Taylor [A6]  | 2011  | Clinical Rehabilitation                                             | A pilot cluster randomized controlled trial of structured goal-setting following stroke                                                                                 | Rehabilitation services                                             |
| Drahota [A7] | 2013  | Age and Ageing                                                      | Pilot cluster randomised controlled trial of flooring to reduce injuries from falls in wards for older people.                                                          | Study areas - bays within hospitals                                 |
| Frenn [A8]   | 2013  | Journal for Specialists in Pediatric Nursing                        | Authoritative feeding behaviors to reduce child BMI through online interventions                                                                                        | Classrooms                                                          |
| Gifford [A9] | 2012  | World Views on Evidence-Based Nursing                               | Developing leadership capacity for guideline use: a pilot cluster randomized control trial.                                                                             | Service delivery centers with nursing care for diabetic foot ulcers |
| Jones [A10]  | 2013  | Journal of Medical Internet Research                                | Recruitment to online therapies for depression: pilot cluster randomized controlled trial.                                                                              | Postcode areas                                                      |
| Moore [A11]  | 2013  | Substance Abuse Treatment, Prevention, and Policy                   | An exploratory cluster randomised trial of a university halls of residence based social norms marketing campaign to reduce alcohol consumption among 1st year students. | Residence halls                                                     |
| Pai [A12]    | 2013  | Implementation Science                                              | Strategies to enhance venous thromboprophylaxis in hospitalized medical patients (SENTRY): a pilot cluster randomized trial                                             | Hospitals                                                           |
| Reeves [A13] | 2013  | BMC Health Services Research                                        | Facilitated patient experience feedback can improve nursing care: a pilot study for a phase III cluster randomised controlled trial.                                    | Wards                                                               |
| Teut [A14]   | 2013  | Clinical Interventions in Aging                                     | Effects and feasibility of an Integrative Medicine program for geriatric patients-a cluster-randomized pilot study.                                                     | Shared apartments                                                   |
| Jago [A15]   | 2014  | International Journal of Behavioral Nutrition and Physical Activity | Randomised feasibility trial of a teaching assistant led extracurricular physical activity intervention for 9 to 11 year olds: Action 3:30                              | Primary schools                                                     |
| Michie [A16] | 2014  | Contraception                                                       | Pharmacy-based interventions for initiating effective contraception following the use of emergency contraception: a pilot study                                         | Pharmacies                                                          |
| Mytton [A17] | 2014  | Health Technology Assessment                                        | The feasibility of using a parenting programme for the prevention of unintentional home injuries in the under-fives: a cluster randomised controlled trial.             | Children's centres                                                  |
| Thomas [A18] | 2014  | Trials                                                              | Identifying continence options after stroke (ICONS): a cluster randomised controlled feasibility trial                                                                  | Stroke services                                                     |

\* We extracted the earlier of the print and electronic publication year.

**Table 2: Characteristics of pilot CRTs included in this review**

| Characteristic                                                          | Number of trials (%) |
|-------------------------------------------------------------------------|----------------------|
| Publication year (earlier of the print and electronic publication date) |                      |
| 2010 <sup>a</sup>                                                       | 1 (6)                |
| 2011                                                                    | 3 (17)               |
| 2012                                                                    | 3 (17)               |
| 2013                                                                    | 7 (39)               |
| 2014                                                                    | 4 (22)               |
| Country                                                                 |                      |
| UK                                                                      | 10 (56)              |
| Canada                                                                  | 3 (17)               |
| USA                                                                     | 2 (11)               |
| Germany                                                                 | 1 (6)                |
| New Zealand                                                             | 1 (6)                |
| Australia                                                               | 1 (6)                |
| Method of cluster randomisation <sup>b</sup>                            |                      |
| Simple                                                                  | 1 (8)                |
| Stratified with blocks                                                  | 9 (69)               |
| Blocked only                                                            | 2 (15)               |
| Bias coin method                                                        | 1 (8)                |
| Number of clusters randomised <sup>c</sup>                              |                      |
| Median (IQR)                                                            | 8 (4 to 16)          |
| Range                                                                   | 2 to 50              |
| Average cluster size <sup>d</sup>                                       |                      |
| Median (IQR)                                                            | 32 (14 to 82)        |
| Range                                                                   | 7 to 588             |

<sup>a</sup> 1 paper has an extracted publication year outside of the 2011 to 2014 range. This is because the print publication date for this paper was 2011 but the online publication date was 2010, so the paper satisfies the inclusion criteria which states that the publication date, print or electronic, must be between 2011 and 2014, but we extract the earlier of the print and electronic dates.

<sup>b</sup> 13 of the 18 trials reported their method of randomisation. Percentages are given as a percentage of these 13 trials.

<sup>c</sup> Not reported for 1 trial.

<sup>d</sup> Defined as number of individuals randomised divided by number of clusters randomised, based on 12 trials that reported information on both.

**Table 3: Pilot trial objectives and methods**

| Characteristic                                                                                                  | Number of trials (%) |
|-----------------------------------------------------------------------------------------------------------------|----------------------|
| Primary objective is feasibility <sup>1</sup>                                                                   | 10 (56)              |
| Main <u>feasibility</u> objective given                                                                         |                      |
| <i>Where feasibility is primary objective</i>                                                                   |                      |
| Implementing intervention                                                                                       | 6/10 (60)            |
| Recruitment and retention                                                                                       | 3/10 (30)            |
| Feasibility of cluster design                                                                                   | 1/10 (10)            |
| <i>Where feasibility is not primary objective<sup>2</sup></i>                                                   |                      |
| Implementing intervention                                                                                       | 3/8 (38)             |
| Recruitment                                                                                                     | 2/8 (25)             |
| Cluster design                                                                                                  | 1/8 (13)             |
| Feasibility of trial being able to answer the effectiveness question (and what study design would enable this)  | 1/8 (13)             |
| Feasibility of larger study                                                                                     | 1/8 (13)             |
| Method used to address main <u>feasibility</u> objective given                                                  |                      |
| <i>Where feasibility is primary objective</i>                                                                   |                      |
| Descriptive statistics and/or qualitative                                                                       | 9/10 (90)            |
| Statistical test                                                                                                | 1/10 (10)            |
| <i>Where feasibility is not primary objective</i>                                                               |                      |
| Descriptive statistics/Qualitative                                                                              | 3/8 (38)             |
| None given/reported elsewhere                                                                                   | 5/8 (63)             |
| Rationale for numbers in pilot trial based on formal power calculation for effectiveness/ efficacy <sup>3</sup> | 0/8 (0)              |
| Performing any formal hypothesis testing for effectiveness/ efficacy                                            | 9/18 (50)            |
| Making any statements about effectiveness/ efficacy without a caveat                                            | 4/18 (22)            |

<sup>1</sup> Where the primary objective was not feasibility, the primary objective was effectiveness/ potential effectiveness and was addressed using statistical tests.

<sup>2</sup> One of the inclusion criteria was that studies were assessing feasibility, but it did not have to be the primary objective

<sup>3</sup> Based on 8 trials that reported a rationale for the sample size of the pilot trial

Table 4: Number (%) of reports adhering to pilot CRT quality criteria

|                              | Item                      | Criterion                                                                                                                                                                                                                                                                                                                                                        | n(%)                                                                                              |
|------------------------------|---------------------------|------------------------------------------------------------------------------------------------------------------------------------------------------------------------------------------------------------------------------------------------------------------------------------------------------------------------------------------------------------------|---------------------------------------------------------------------------------------------------|
| Title and Abstract           | 1a                        | Term 'pilot' or 'feasibility' included in the title<br>Identification as a pilot or feasibility randomised trial in the title                                                                                                                                                                                                                                    | 15 (83)<br>12 (67)                                                                                |
|                              | <b>1a</b>                 | <b>Term 'cluster' included in the title</b><br><b>Identification as a cluster randomised trial in the title</b>                                                                                                                                                                                                                                                  | 12 (67)<br>12 (67)                                                                                |
| Introduction                 | 2a                        | Scientific background and explanation of rationale for future definitive trial reported                                                                                                                                                                                                                                                                          | 18 (100)                                                                                          |
|                              | [S]                       | Reasons for randomised pilot trial reported                                                                                                                                                                                                                                                                                                                      | 7 (39)                                                                                            |
|                              | <b>2a</b>                 | <b>Rationale given for using cluster design</b>                                                                                                                                                                                                                                                                                                                  | 6 (33)                                                                                            |
| Methods – Trial design       | 3a                        | Description of pilot trial design                                                                                                                                                                                                                                                                                                                                | 18 (100)                                                                                          |
|                              | <b>3a</b>                 | <b>Definition of cluster</b>                                                                                                                                                                                                                                                                                                                                     | 18 (100)                                                                                          |
|                              | 3b                        | Reported any changes to methods after pilot trial commencement<br>If yes, reported reasons                                                                                                                                                                                                                                                                       | 5 (28)<br>5/5 (100)                                                                               |
| Methods – Participants       | 4a                        | Reported eligibility criteria for participants                                                                                                                                                                                                                                                                                                                   | 13 (72)                                                                                           |
|                              | <b>4a</b>                 | <b>Reported eligibility criteria for clusters</b>                                                                                                                                                                                                                                                                                                                | 9 (50)                                                                                            |
|                              | 4b                        | Reported settings and locations where the data were collected                                                                                                                                                                                                                                                                                                    | 18 (100)                                                                                          |
|                              | 4c<br>[N]                 | Reported how participants were identified<br><b>Reported how clusters were identified</b><br>Reported how participants were consented <sup>1</sup><br><b>Reported how clusters were consented</b>                                                                                                                                                                | 9 (50)<br>6 (33)<br>13/17 (76)<br>2 (11)                                                          |
| Methods – Interventions      | 5                         | Described the interventions for each group                                                                                                                                                                                                                                                                                                                       | 13 (72)                                                                                           |
| Methods - Outcomes           | 6b                        | Reported any changes to pilot trial assessments or measurements after pilot trial commencement<br>If yes, reported reasons                                                                                                                                                                                                                                       | 1 (6)<br>1/1(100)                                                                                 |
|                              | 6c<br>[N]                 | Reported criteria used to judge whether, or how, to proceed with the future definitive trial                                                                                                                                                                                                                                                                     | 3 (17)                                                                                            |
| Methods – Sample size        | 7a<br>[S]                 | Reported a rationale for the sample size of the pilot trial                                                                                                                                                                                                                                                                                                      | 8 (44)                                                                                            |
|                              | <b>7a</b>                 | <b>Cluster design considered during the description of the rationale for numbers in the pilot trial</b>                                                                                                                                                                                                                                                          | 3 (17)                                                                                            |
|                              | 7b                        | Reported stopping guidelines                                                                                                                                                                                                                                                                                                                                     | 0 (0)                                                                                             |
| Methods - Randomisation      | 8a                        | Reported method used to generate the random allocation sequence                                                                                                                                                                                                                                                                                                  | 9 (50)                                                                                            |
|                              | 8b                        | Reported randomisation method                                                                                                                                                                                                                                                                                                                                    | 13 (72)                                                                                           |
|                              | 9                         | Reported mechanism used to implement the random allocation sequence<br>Reported allocation concealment                                                                                                                                                                                                                                                           | 4 (22)<br>7 (39)                                                                                  |
|                              | 10/<br><b>10a</b>         | Reported who:<br>Generated the random allocation sequence<br><b>Enrolled clusters</b><br><b>Assigned clusters to interventions</b>                                                                                                                                                                                                                               | 8 (44)<br>3 (17)<br>4 (22)                                                                        |
|                              | <b>10c</b>                | <b>Reported from whom consent was sought</b><br><i>Reported whether consent was sought from participants</i><br><b>Reported whether consent was sought from clusters</b><br><b>Reported whether participant consent was sought before or after randomisation</b> <sup>1</sup>                                                                                    | 2 (11)<br>17 (94)<br>2 (11)<br>8/17 (47)                                                          |
| Methods - Blinding           | 11a                       | Reported on whether there was blinding<br>Reported who was blinded <sup>2</sup><br>Reported how they were blinded <sup>2</sup>                                                                                                                                                                                                                                   | 10 (56)<br>6/14 (43)<br>1/14 (7)                                                                  |
| Methods – Analytical methods | <b>12a</b>                | <b>Reports clustering accounted for in any of the methods used to address pilot trial objectives/ research questions</b> <sup>3</sup>                                                                                                                                                                                                                            | 13/17 (76)                                                                                        |
| Results – Participant flow   | 13*                       | Reports a diagram with flow of individuals through the trial                                                                                                                                                                                                                                                                                                     | 12 (67)                                                                                           |
|                              | <b>13*</b>                | <b>Reports a diagram with flow of clusters through the trial</b>                                                                                                                                                                                                                                                                                                 | 10 (56)                                                                                           |
|                              | 13a/<br><b>13a</b><br>[S] | Reported number of:<br>Individuals ( <b>Clusters</b> ) approached and/or assessed for eligibility <sup>4</sup><br>Individuals ( <b>Clusters</b> ) randomly assigned <sup>4</sup><br>Individuals ( <b>Clusters</b> ) that received intended treatment <sup>4; 4</sup><br>Individuals ( <b>Clusters</b> ) that were assessed for primary objective <sup>4; 4</sup> | 8/17 (47); 10/18 (56)<br>13/17 (76); 17/18 (94)<br>8/17 (47); 5/17 (29)<br>16/17 (94); 14/17 (82) |
|                              | 13b/<br><b>13b</b>        | Reported number of:<br>Losses for individuals ( <b>Clusters</b> ) after randomisation <sup>4; 4</sup><br>Exclusions for individuals ( <b>Clusters</b> ) after randomisation <sup>4; 4</sup>                                                                                                                                                                      | 11/16 (69); 6/17 (35)<br>1/17 (6); 3/17 (18)                                                      |
|                              | 14a                       | Reported on dates defining the periods of recruitment                                                                                                                                                                                                                                                                                                            | 8 (44)                                                                                            |

|                                   |            |                                                                                                             |                               |
|-----------------------------------|------------|-------------------------------------------------------------------------------------------------------------|-------------------------------|
|                                   |            | Reported on dates defining the periods of follow up                                                         | 11 (61)                       |
|                                   | 14b        | Reported the pilot trial ended/stopped                                                                      | 0 (0)                         |
| Results – Baseline data           | 15         | Reported a table showing baseline characteristics for the individual level<br>If yes, by group              | 12 (67)<br>11/12 (92)         |
|                                   | <b>15</b>  | <b>Reported a table showing baseline characteristics for the cluster level<br/>If yes, by group</b>         | 2 (11)<br>2/2 (100)           |
| Results – Outcomes and estimation | 17a        | Reported results for main feasibility objective (quantitative or qualitative) <sup>5</sup>                  | 13/17 (76)                    |
| Results - Harms                   | 19         | Reported on harms or unintended effects                                                                     | 4 (22)                        |
|                                   | 19a<br>[N] | Reported other unintended consequences                                                                      | 0 (0)                         |
| Discussion                        | 20<br>[S]  | Reported limitations of pilot trial<br>Reported sources of potential bias<br>Reported remaining uncertainty | 17 (94)<br>10 (56)<br>10 (56) |
|                                   | 21<br>[S]  | Reported generalisability of pilot trial methods/findings to future definitive trial or other studies       | 16 (89)                       |
|                                   | 22         | Interpretation of feasibility consistent with main feasibility objectives and findings <sup>5</sup>         | 12/17 (71)                    |
|                                   | 22A<br>[N] | Reported implications for progression from the pilot to the future definitive trial                         | 16 (89)                       |
|                                   | 23         | Reported registration number for pilot trial<br>Reported name of registry for pilot trial                   | 11 (61)<br>11 (61)            |
| Other information                 | 24<br>[S]  | Reported where the pilot trial protocol can be accessed                                                     | 7 (39)                        |
|                                   | 25         | Reported source of funding                                                                                  | 18 (100)                      |
|                                   | 26<br>[N]  | Reported ethical approval/research review committee approval<br>If yes, reported reference number           | 17 (94)<br>8/17 (47)          |

Item numbers in normal font refer to the item in the CONSORT extension for pilot trials that the quality assessment item is based on.

**Item numbers in bold italics refer to the item in the CONSORT extension for CRTs that the quality assessment item is based on.**

[N] represents new items in the CONSORT extension for pilot trials compared to the CONSORT 2010 for RCTs.

[S] represents items in the CONSORT extension for pilot trials that are substantially adapted from the CONSORT 2010 for RCTs.

\*The CONSORT statements do not include an item 13 but there is a participant flow subheading which strongly recommends a diagram. We therefore reference this subheading as 'item 13' here.

<sup>1</sup> Item not relevant for 1 trial [A12] because they said that the Ethics Board determined it could be conducted without informed consent from patients or surrogates.

<sup>2</sup> Item not relevant for 4 trials [A7, A10, A12, A18] because they reported that blinding was not used.

<sup>3</sup> Item not relevant for 1 trial because no confidence intervals/p-values were given,[A17] so clustering did not need to be accounted for in any of their methods because effect estimates are not biased by cluster randomisation, only confidence intervals/p-values.

<sup>4</sup> Not relevant for 1 trial due to the design of the study.[A10] (This paper was different from the others such that it was not relevant to extract these items. The clusters were postcode areas and they were assessing two online recruitment interventions and comparing the success of the recruitment interventions. As such, participants were those who completed the online questions, and each arm of the study had a "total population ranging from 1.6 to 2 million people clustered in 4 postcode areas")

<sup>4\*</sup> Not relevant for 2 trials due to the design of these studies.[A10, A12] (See reason above for A10. For A12, data was collected from medical patient charts so these items were not relevant to extract)

<sup>5</sup> One paper reports the feasibility results in a separate paper so is not included.[A3]

**Table 5: Number (%) of quality assessment criteria reported by each pilot CRT in this review**

| Study        | Overall n(%)* | Title & abstract and Introduction n(%) | Methods n(%) | Results n(%) | Discussion and Other information n(%) |
|--------------|---------------|----------------------------------------|--------------|--------------|---------------------------------------|
| Drahota [A7] | 50(70)        | 6(86)                                  | 17(59)       | 18(78)       | 9(75)                                 |
| Pai [A12]    | 48(69)        | 5(71)                                  | 17(61)       | 18(78)       | 8(67)                                 |
| Mytton [A17] | 50(68)        | 4(57)                                  | 21(66)       | 13(57)       | 12(100)                               |
| Thomas [A18] | 46(67)        | 5(71)                                  | 17(59)       | 15(65)       | 9(90)                                 |
| Teut [A14]   | 49(66)        | 6(86)                                  | 20(63)       | 14(61)       | 9(75)                                 |
| Taylor [A6]  | 47(64)        | 7(100)                                 | 16(52)       | 13(57)       | 11(92)                                |
| Légaré [A3]  | 42(58)        | 3(43)                                  | 18(56)       | 14(61)       | 7(64)                                 |
| Begh [A1]    | 41(56)        | 5(71)                                  | 16(52)       | 11(48)       | 9(75)                                 |
| Jago [A15]   | 39(55)        | 4(57)                                  | 11(38)       | 13(57)       | 11(92)                                |
| Jones [A10]  | 32(52)        | 7(100)                                 | 10(33)       | 6(50)        | 9(75)                                 |
| Moore [A11]  | 37(52)        | 5(71)                                  | 13(45)       | 8(35)        | 11(92)                                |
| Michie [A16] | 36(51)        | 3(43)                                  | 15(52)       | 8(36)        | 10(83)                                |
| Jones [A2]   | 37(51)        | 3(43)                                  | 15(48)       | 10(45)       | 9(75)                                 |
| Jago [A5]    | 33(46)        | 4(57)                                  | 13(45)       | 10(43)       | 6(50)                                 |
| Gifford [A9] | 33(45)        | 6(86)                                  | 12(39)       | 8(35)        | 7(58)                                 |
| Reeves [A13] | 29(41)        | 6(86)                                  | 11(38)       | 7(32)        | 5(42)                                 |
| Frenn [A8]   | 18(26)        | 1(14)                                  | 5(17)        | 7(32)        | 5(42)                                 |
| Hopkins [A4] | 16(23)        | 2(29)                                  | 4(14)        | 4(18)        | 6(50)                                 |

\*This is the overall number(percentage) of the quality assessment items in Table 4 that are reported by each study. The other columns look at this within categories. Note that the denominator varies between studies because not all quality assessment items are relevant for all studies (see footnote of Table 4) and not applicable for some items if a related item is not reported (see items 3b, 6b, 15, 26 in Table 4).

## FIGURES

**Figure 1: Flow diagram of the identification process for the sample of 18 pilot cluster randomised trials included in this review**

## APPENDICES

**Appendix 1: Search strategy**

**Appendix 2: Data extracted**

**Appendix 3: List of studies included in this systematic review**



1  
2  
3  
4  
5  
6  
7  
8  
9  
10  
11  
12  
13  
14  
15  
16  
17  
18  
19  
20  
21  
22  
23  
24  
25  
26  
27  
28  
29  
30  
31  
32  
33  
34  
35  
36  
37  
38  
39  
40  
41  
42  
43  
44  
45  
46  
47  
48  
49  
50  
51  
52  
53  
54  
55  
56  
57  
58  
59  
60

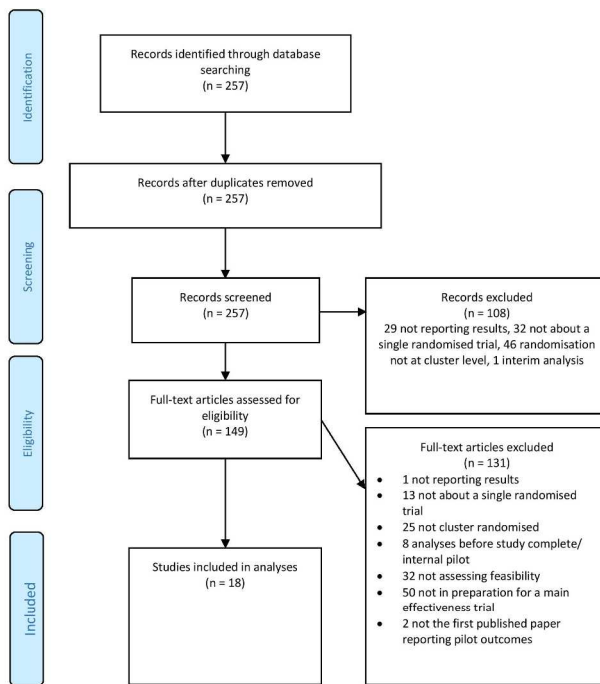

Flow diagram of the identification process for the sample of 18 pilot cluster randomised trials included in this review

210x297mm (300 x 300 DPI)

**Appendix 1: Search strategy**

|      |                                                                                                                                                                                                                         |
|------|-------------------------------------------------------------------------------------------------------------------------------------------------------------------------------------------------------------------------|
| #1:  | randomised trial [All fields]                                                                                                                                                                                           |
| #2:  | randomized trial [All fields]                                                                                                                                                                                           |
| #3:  | #1 OR #2                                                                                                                                                                                                                |
| #4:  | clinical trial [All Fields]                                                                                                                                                                                             |
| #5:  | #3 AND #4                                                                                                                                                                                                               |
| #6:  | ((cluster randomization) OR (cluster randomisation) OR (cluster) OR (clustered) OR (clustering) OR (clusters) OR (group-randomized) OR (group-randomised) OR (randomisation unit) OR (randomization unit)) [All fields] |
| #7:  | #5 AND #6                                                                                                                                                                                                               |
| #8:  | pilot [Title/Abstract]                                                                                                                                                                                                  |
| #9:  | feasibility [Title/Abstract]                                                                                                                                                                                            |
| #10: | #8 OR #9                                                                                                                                                                                                                |
| #11: | #7 AND #10                                                                                                                                                                                                              |
| #12: | protocol [Title]                                                                                                                                                                                                        |
| #13: | #11 NOT #12                                                                                                                                                                                                             |
| #14: | ("2011/01/01"[Date - Publication] : "2014/12/31"[Date - Publication])                                                                                                                                                   |
| #15: | #13 AND #14                                                                                                                                                                                                             |

## Appendix 2: Data extracted

| Items                                                                                                           | Data extracted                                                  | Further information                                                                                                                                                                                                                                                                                       |
|-----------------------------------------------------------------------------------------------------------------|-----------------------------------------------------------------|-----------------------------------------------------------------------------------------------------------------------------------------------------------------------------------------------------------------------------------------------------------------------------------------------------------|
| <b>Descriptives</b>                                                                                             |                                                                 |                                                                                                                                                                                                                                                                                                           |
| Name of first author                                                                                            | Text                                                            |                                                                                                                                                                                                                                                                                                           |
| Publication year                                                                                                | Date                                                            | The earlier of the print date and electronic date                                                                                                                                                                                                                                                         |
| Journal                                                                                                         | Text                                                            |                                                                                                                                                                                                                                                                                                           |
| Title                                                                                                           | Text                                                            |                                                                                                                                                                                                                                                                                                           |
| Country (or countries) in which the trial was set                                                               | Text                                                            |                                                                                                                                                                                                                                                                                                           |
| Setting where the data were collected                                                                           | Text                                                            | e.g. community, hospital clinic etc.                                                                                                                                                                                                                                                                      |
| Pilot trial design                                                                                              | Parallel CRT,<br>factorial CRT,<br>cross-over CRT,<br>other CRT |                                                                                                                                                                                                                                                                                                           |
| What was the cluster?                                                                                           | Text                                                            |                                                                                                                                                                                                                                                                                                           |
| Method of cluster randomisation                                                                                 | Text                                                            |                                                                                                                                                                                                                                                                                                           |
| Number of clusters randomised                                                                                   | Number                                                          |                                                                                                                                                                                                                                                                                                           |
| Number of individuals randomised                                                                                | Number                                                          |                                                                                                                                                                                                                                                                                                           |
| <b>Additional items relating to pilot trial methodology</b>                                                     |                                                                 |                                                                                                                                                                                                                                                                                                           |
| Primary objective/ research question of the pilot trial                                                         | Text                                                            | As specified by the author, else the outcome used in the sample size justification, or else the first objective/ research question mentioned in the abstract or else main text (following a similar method as that used by Diaz-Ordaz et al.[8])                                                          |
| Is the primary objective feasibility?                                                                           | Yes/No                                                          |                                                                                                                                                                                                                                                                                                           |
| Primary objective/ research question measure                                                                    | Text                                                            |                                                                                                                                                                                                                                                                                                           |
| Method used to address primary objective/ research question                                                     | Text                                                            | Defined as the main method presented for the primary objective/ research question                                                                                                                                                                                                                         |
| Main feasibility objective/ research question of the pilot trial                                                | Text                                                            | As specified by the author, else the feasibility outcome used in the sample size justification, or else the first feasibility objective/ research question mentioned in the abstract or else main text                                                                                                    |
| Main feasibility objective/ research question measure                                                           | Text                                                            |                                                                                                                                                                                                                                                                                                           |
| Method used to address main feasibility objective/ research question                                            | Text                                                            | Defined as the main method presented for the primary objective/ research question                                                                                                                                                                                                                         |
| Is the rationale for numbers in the pilot trial based on formal power calculation for effectiveness (efficacy)? | Yes/no                                                          |                                                                                                                                                                                                                                                                                                           |
| Is the paper performing any formal hypothesis testing for effectiveness/ efficacy?                              | Yes/no                                                          |                                                                                                                                                                                                                                                                                                           |
| Is the paper making any statements about effectiveness/ efficacy without a caveat                               | Yes/no                                                          | The caveat must explain that it is an indication of <i>potential</i> effectiveness or explain that the study is underpowered                                                                                                                                                                              |
| <b>Title and Abstract</b>                                                                                       |                                                                 |                                                                                                                                                                                                                                                                                                           |
| Term 'pilot' or 'feasibility' included in the title                                                             | Yes/no                                                          |                                                                                                                                                                                                                                                                                                           |
| Identification as a pilot or feasibility randomised trial in the title                                          | Yes/no                                                          | Require 'pilot randomised trial' or 'feasibility randomised trial' in the title, or 'pilot study' or 'feasibility study' and 'randomised trial' in the title                                                                                                                                              |
| Term 'cluster' included in the title                                                                            | Yes/no                                                          |                                                                                                                                                                                                                                                                                                           |
| Identification as a cluster randomised trial in the title                                                       | Yes/no                                                          | Require 'cluster randomised trial' in the title – don't accept 'clustered' as this can imply correlation rather than cluster randomised                                                                                                                                                                   |
| <b>Introduction</b>                                                                                             |                                                                 |                                                                                                                                                                                                                                                                                                           |
| Scientific background and explanation of rationale for future definitive trial reported                         | Yes/no                                                          |                                                                                                                                                                                                                                                                                                           |
| Reasons for randomised pilot trial reported                                                                     | Yes/no                                                          | We specified there needed to be a rationale in the introduction section for the randomised pilot trial, which was not just simply stating the aims/ objectives/outcomes of the pilot trial but gave a clear rationale of why the pilot trial was needed before proceeding to the future definitive trial. |

|    |                                                                                                  |        |                                                                                                                                                                                                                                                                                                      |
|----|--------------------------------------------------------------------------------------------------|--------|------------------------------------------------------------------------------------------------------------------------------------------------------------------------------------------------------------------------------------------------------------------------------------------------------|
| 1  |                                                                                                  |        |                                                                                                                                                                                                                                                                                                      |
| 2  |                                                                                                  |        |                                                                                                                                                                                                                                                                                                      |
| 3  | Rationale given for using cluster design                                                         | Yes/no |                                                                                                                                                                                                                                                                                                      |
| 4  | Methods – Trial design                                                                           |        |                                                                                                                                                                                                                                                                                                      |
| 5  | Description of pilot trial design                                                                | Yes/no |                                                                                                                                                                                                                                                                                                      |
| 6  | Definition of cluster                                                                            | Yes/no |                                                                                                                                                                                                                                                                                                      |
| 7  | Reported any changes to methods after pilot trial commencement                                   | Yes/no |                                                                                                                                                                                                                                                                                                      |
| 8  | If yes, reported reasons                                                                         | Yes/no |                                                                                                                                                                                                                                                                                                      |
| 9  | Methods – Participants                                                                           |        |                                                                                                                                                                                                                                                                                                      |
| 10 | Reported eligibility criteria for participants                                                   | Yes/no |                                                                                                                                                                                                                                                                                                      |
| 11 | Reported eligibility criteria for clusters                                                       | Yes/no |                                                                                                                                                                                                                                                                                                      |
| 12 | Reported settings and locations where the data were collected                                    | Yes/no |                                                                                                                                                                                                                                                                                                      |
| 13 | Reported how participants were identified                                                        | Yes/no | We required that the authors describe the exact way the participants were identified (e.g. during consultations/visits to the cluster, or through advertisement requesting volunteers)                                                                                                               |
| 14 |                                                                                                  |        |                                                                                                                                                                                                                                                                                                      |
| 15 | Reported how clusters were identified                                                            | Yes/no | We required that the authors describe the exact way the clusters were identified (e.g. all clusters in a particular geographical location, or selection from a register/list etc.)                                                                                                                   |
| 16 |                                                                                                  |        |                                                                                                                                                                                                                                                                                                      |
| 17 |                                                                                                  |        |                                                                                                                                                                                                                                                                                                      |
| 18 | Reported how participants were consented                                                         | Yes/no |                                                                                                                                                                                                                                                                                                      |
| 19 | Reported how clusters were consented                                                             | Yes/no |                                                                                                                                                                                                                                                                                                      |
| 20 |                                                                                                  |        |                                                                                                                                                                                                                                                                                                      |
| 21 |                                                                                                  |        |                                                                                                                                                                                                                                                                                                      |
| 22 |                                                                                                  |        |                                                                                                                                                                                                                                                                                                      |
| 23 |                                                                                                  |        |                                                                                                                                                                                                                                                                                                      |
| 24 | Methods – Interventions                                                                          |        |                                                                                                                                                                                                                                                                                                      |
| 25 | Described the interventions for each group                                                       | Yes/no |                                                                                                                                                                                                                                                                                                      |
| 26 | Methods – Outcomes                                                                               |        |                                                                                                                                                                                                                                                                                                      |
| 27 | Reported any changes to pilot trial assessments or measurements after pilot trial commencement   | Yes/no |                                                                                                                                                                                                                                                                                                      |
| 28 | If yes, reported reasons                                                                         | Yes/no |                                                                                                                                                                                                                                                                                                      |
| 29 | Reported criteria used to judge whether, or how, to proceed with the future definitive trial     | Yes/no |                                                                                                                                                                                                                                                                                                      |
| 30 |                                                                                                  |        |                                                                                                                                                                                                                                                                                                      |
| 31 | Methods – Sample size                                                                            |        |                                                                                                                                                                                                                                                                                                      |
| 32 | Reported a rationale for the sample size of the pilot trial                                      | Yes/no |                                                                                                                                                                                                                                                                                                      |
| 33 | Cluster design considered during the description of the rationale for numbers in the pilot trial | Yes/no | We required that the authors show some consideration about clustering during the description of their sample size calculation, even if not formally accounting for it currently but describe during their rationale that they e.g. plan to estimate the design effect in the future definitive trial |
| 34 |                                                                                                  |        |                                                                                                                                                                                                                                                                                                      |
| 35 |                                                                                                  |        |                                                                                                                                                                                                                                                                                                      |
| 36 |                                                                                                  |        |                                                                                                                                                                                                                                                                                                      |
| 37 |                                                                                                  |        |                                                                                                                                                                                                                                                                                                      |
| 38 |                                                                                                  |        |                                                                                                                                                                                                                                                                                                      |
| 39 |                                                                                                  |        |                                                                                                                                                                                                                                                                                                      |
| 40 | Reported stopping guidelines                                                                     | Yes/no |                                                                                                                                                                                                                                                                                                      |
| 41 | Methods – Randomisation                                                                          |        |                                                                                                                                                                                                                                                                                                      |
| 42 | Reported method used to generate the random allocation sequence                                  | Yes/no | e.g. random numbers table, coin tossing, computer generated random list                                                                                                                                                                                                                              |
| 43 | Reported randomisation method                                                                    | Yes/no |                                                                                                                                                                                                                                                                                                      |
| 44 | If yes, randomisation method                                                                     | Text   | e.g. simple, stratification, blocking, matching                                                                                                                                                                                                                                                      |
| 45 | Reported mechanism used to implement the random allocation sequence                              | Yes/no | e.g. sequentially numbered containers, sealed envelopes, central telephone                                                                                                                                                                                                                           |
| 46 | Reported allocation concealment                                                                  | Yes/no |                                                                                                                                                                                                                                                                                                      |
| 47 | Reported who:                                                                                    |        |                                                                                                                                                                                                                                                                                                      |
| 48 | Generated the random allocation sequence                                                         | Yes/no |                                                                                                                                                                                                                                                                                                      |
| 49 | Enrolled clusters                                                                                | Yes/no | Tick yes for last two points if a 'who' is not relevant since done by e.g. post/online                                                                                                                                                                                                               |
| 50 | Assigned clusters to interventions                                                               | Yes/no |                                                                                                                                                                                                                                                                                                      |
| 51 | Reported whether consent was sought from participants                                            | Yes/no |                                                                                                                                                                                                                                                                                                      |
| 52 | Reported whether consent was sought from clusters                                                | Yes/no |                                                                                                                                                                                                                                                                                                      |
| 53 | Reported from whom consent was sought                                                            | Yes/no | I.e. reported both whether consent was sought from participants and whether consent was sought from clusters                                                                                                                                                                                         |
| 54 |                                                                                                  |        |                                                                                                                                                                                                                                                                                                      |
| 55 |                                                                                                  |        |                                                                                                                                                                                                                                                                                                      |
| 56 | Reported whether participant consent was sought before or after randomisation                    | Yes/no |                                                                                                                                                                                                                                                                                                      |
| 57 |                                                                                                  |        |                                                                                                                                                                                                                                                                                                      |
| 58 | Methods – Blinding                                                                               |        |                                                                                                                                                                                                                                                                                                      |
| 59 | Reported on whether there was blinding                                                           | Yes/no |                                                                                                                                                                                                                                                                                                      |
| 60 |                                                                                                  |        |                                                                                                                                                                                                                                                                                                      |

|    |                                                                                                                   |        |                                                                                                                                                                                                                                                                                                                                                                                                                                                                                                                     |
|----|-------------------------------------------------------------------------------------------------------------------|--------|---------------------------------------------------------------------------------------------------------------------------------------------------------------------------------------------------------------------------------------------------------------------------------------------------------------------------------------------------------------------------------------------------------------------------------------------------------------------------------------------------------------------|
| 1  | Reported who was blinded                                                                                          | Yes/no | tick yes if they report anyone who was blinded, even if they don't report on everyone                                                                                                                                                                                                                                                                                                                                                                                                                               |
| 2  | Reported how they were blinded                                                                                    | Yes/no | tick yes if they report on how anyone was blinded, even if they don't report on how everyone who was blinded was blinded                                                                                                                                                                                                                                                                                                                                                                                            |
| 3  | <b>Methods – Analytical methods</b>                                                                               |        |                                                                                                                                                                                                                                                                                                                                                                                                                                                                                                                     |
| 4  | Reports clustering accounted for in any of the methods used to address pilot trial objectives/ research questions | Yes/no |                                                                                                                                                                                                                                                                                                                                                                                                                                                                                                                     |
| 5  | <b>Results – Participant flow</b>                                                                                 |        |                                                                                                                                                                                                                                                                                                                                                                                                                                                                                                                     |
| 6  | Reports a diagram with flow of individuals through the trial                                                      | Yes/no |                                                                                                                                                                                                                                                                                                                                                                                                                                                                                                                     |
| 7  | Reports a diagram with flow of clusters through the trial                                                         | Yes/no |                                                                                                                                                                                                                                                                                                                                                                                                                                                                                                                     |
| 8  | Reported number of:                                                                                               |        |                                                                                                                                                                                                                                                                                                                                                                                                                                                                                                                     |
| 9  | Individuals approached and/or assessed for eligibility                                                            | Yes/no |                                                                                                                                                                                                                                                                                                                                                                                                                                                                                                                     |
| 10 | Individuals randomly assigned                                                                                     | Yes/no |                                                                                                                                                                                                                                                                                                                                                                                                                                                                                                                     |
| 11 | Individuals that received intended treatment                                                                      | Yes/no |                                                                                                                                                                                                                                                                                                                                                                                                                                                                                                                     |
| 12 | Losses for individuals after randomisation                                                                        | Yes/no |                                                                                                                                                                                                                                                                                                                                                                                                                                                                                                                     |
| 13 | Exclusions for individuals after randomisation                                                                    | Yes/no |                                                                                                                                                                                                                                                                                                                                                                                                                                                                                                                     |
| 14 | Individuals that were assessed for primary objective                                                              | Yes/no |                                                                                                                                                                                                                                                                                                                                                                                                                                                                                                                     |
| 15 | Reported number of:                                                                                               |        |                                                                                                                                                                                                                                                                                                                                                                                                                                                                                                                     |
| 16 | Clusters approached and/or assessed for eligibility                                                               | Yes/no |                                                                                                                                                                                                                                                                                                                                                                                                                                                                                                                     |
| 17 | Clusters randomly assigned                                                                                        | Yes/no |                                                                                                                                                                                                                                                                                                                                                                                                                                                                                                                     |
| 18 | Clusters that received intended treatment                                                                         | Yes/no |                                                                                                                                                                                                                                                                                                                                                                                                                                                                                                                     |
| 19 | Losses for clusters after randomisation                                                                           | Yes/no |                                                                                                                                                                                                                                                                                                                                                                                                                                                                                                                     |
| 20 | Exclusions for clusters after randomisation                                                                       | Yes/no |                                                                                                                                                                                                                                                                                                                                                                                                                                                                                                                     |
| 21 | Clusters that were assessed for primary objective                                                                 | Yes/no |                                                                                                                                                                                                                                                                                                                                                                                                                                                                                                                     |
| 22 | <b>Results – Recruitment</b>                                                                                      |        |                                                                                                                                                                                                                                                                                                                                                                                                                                                                                                                     |
| 23 | Reported on dates defining the periods of recruitment                                                             | Yes/no |                                                                                                                                                                                                                                                                                                                                                                                                                                                                                                                     |
| 24 | Reported on dates defining the periods of follow up                                                               | Yes/no |                                                                                                                                                                                                                                                                                                                                                                                                                                                                                                                     |
| 25 | Reported the pilot trial ended/stopped                                                                            | Yes/no |                                                                                                                                                                                                                                                                                                                                                                                                                                                                                                                     |
| 26 | <b>Results – Baseline data</b>                                                                                    |        |                                                                                                                                                                                                                                                                                                                                                                                                                                                                                                                     |
| 27 | Reported a table showing baseline characteristics for the individual level                                        | Yes/no |                                                                                                                                                                                                                                                                                                                                                                                                                                                                                                                     |
| 28 | If yes, by group                                                                                                  | Yes/no |                                                                                                                                                                                                                                                                                                                                                                                                                                                                                                                     |
| 29 | Reported a table showing baseline characteristics for the cluster level                                           | Yes/no |                                                                                                                                                                                                                                                                                                                                                                                                                                                                                                                     |
| 30 | If yes, by group                                                                                                  | Yes/no |                                                                                                                                                                                                                                                                                                                                                                                                                                                                                                                     |
| 31 | <b>Results – Outcomes and estimation</b>                                                                          |        |                                                                                                                                                                                                                                                                                                                                                                                                                                                                                                                     |
| 32 | Reported results for main feasibility objective (quantitative or qualitative)                                     | Yes/no |                                                                                                                                                                                                                                                                                                                                                                                                                                                                                                                     |
| 33 | <b>Results – Harms</b>                                                                                            |        |                                                                                                                                                                                                                                                                                                                                                                                                                                                                                                                     |
| 34 | Reported on harms or unintended effects                                                                           | Yes/no | Tick yes even if reported that there were no harms                                                                                                                                                                                                                                                                                                                                                                                                                                                                  |
| 35 | Reported other unintended consequences                                                                            | Yes/no | An unintended consequence would be an unexpected result/finding that was not one of the objectives to explore and where the result would have consequences on the future definitive trial, such as a change in design/population etc.                                                                                                                                                                                                                                                                               |
| 36 | <b>Discussion</b>                                                                                                 |        |                                                                                                                                                                                                                                                                                                                                                                                                                                                                                                                     |
| 37 | Reported limitations of pilot trial                                                                               | Yes/no |                                                                                                                                                                                                                                                                                                                                                                                                                                                                                                                     |
| 38 | Reported sources of potential bias                                                                                | Yes/no |                                                                                                                                                                                                                                                                                                                                                                                                                                                                                                                     |
| 39 | Reported remaining uncertainty                                                                                    | Yes/no |                                                                                                                                                                                                                                                                                                                                                                                                                                                                                                                     |
| 40 | Reported generalisability of pilot trial methods/findings to future definitive trial or other studies             | Yes/no | To be reporting on the generalisability of the pilot trial methods/findings to the future definitive trial, we deemed it sufficient for the paper to be discussing whether the methods/findings of the pilot study can be applied to the future definitive trial. To be reporting on the generalisability of the pilot trial methods/findings to other future trials, we deemed it sufficient for the paper to be discussing whether the methods/findings of the pilot study can be applied to other future trials. |
| 41 | Interpretation of feasibility consistent with main feasibility objectives and findings                            | Yes/no |                                                                                                                                                                                                                                                                                                                                                                                                                                                                                                                     |

1  
2  
3  
4  
5  
6  
7  
8  
9  
10  
11  
12  
13  
14  
15  
16  
17  
18  
19  
20  
21  
22  
23  
24  
25  
26  
27  
28  
29  
30  
31  
32  
33  
34  
35  
36  
37  
38  
39  
40  
41  
42  
43  
44  
45  
46  
47  
48  
49  
50  
51  
52  
53  
54  
55  
56  
57  
58  
59  
60

|                                                                                                                            |                                                                                                                             |  |
|----------------------------------------------------------------------------------------------------------------------------|-----------------------------------------------------------------------------------------------------------------------------|--|
| Reported implications for progression from the pilot to the future definitive trial<br>If yes, what were the implications? | Yes/no<br><br>Proceed/<br>proceed with<br>changes/<br>Further<br>research or<br>piloting needed<br>first/ Don't go<br>ahead |  |
| Other information                                                                                                          |                                                                                                                             |  |
| Reported registration number for pilot trial                                                                               | Yes/no                                                                                                                      |  |
| Reported name of registry for pilot trial                                                                                  | Yes/no                                                                                                                      |  |
| Reported where the pilot trial protocol can be accessed                                                                    | Yes/no                                                                                                                      |  |
| Reported source of funding                                                                                                 | Yes/no                                                                                                                      |  |
| Reported ethical approval/research review committee approval<br>If yes, reported reference number                          | Yes/no<br>Yes/no                                                                                                            |  |

**Appendix 3: List of studies included in this systematic review**

(Note that the publication years given in the list below are the print publication years, rather than the earlier of the print or electronic publication year, so there is some discrepancy between the list below and Table 1)

1. Begh RA, Aveyard P, Upton P, Bhopal RS, White M, Amos A, et al. Promoting smoking cessation in Pakistani and Bangladeshi men in the UK: pilot cluster randomised controlled trial of trained community outreach workers. *Trials*. 2011;12:197.
2. Jones RA, Riethmuller A, Hesketh K, Trezise J, Batterham M, Okely AD. Promoting fundamental movement skill development and physical activity in early childhood settings: a cluster randomized controlled trial. *Pediatr Exerc Sci*. 2011;23(4):600-15.
3. Legare F, Labrecque M, LeBlanc A, Njoya M, Laurier C, Cote L, et al. Training family physicians in shared decision making for the use of antibiotics for acute respiratory infections: a pilot clustered randomized controlled trial. *Health Expect*. 2011;14 Suppl 1:96-110.
4. Hopkins JM, Glenn BA, Cole BL, McCarthy W, Yancey A. Implementing organizational physical activity and healthy eating strategies on paid time: process evaluation of the UCLA WORKING pilot study. *Health Educ Res*. 2012;27(3):385-98.
5. Jago R, Sebire SJ, Cooper AR, Haase AM, Powell J, Davis L, et al. Bristol girls dance project feasibility trial: outcome and process evaluation results. *Int J Behav Nutr Phys Act*. 2012;9:83.
6. Taylor WJ, Brown M, William L, McPherson KM, Reed K, Dean SG, et al. A pilot cluster randomized controlled trial of structured goal-setting following stroke. *Clin Rehabil*. 2012;26(4):327-38.
7. Drahota AK, Ward D, Udell JE, Soilemezi D, Ogollah R, Higgins B, et al. Pilot cluster randomised controlled trial of flooring to reduce injuries from falls in wards for older people. *Age Ageing*. 2013;42(5):633-40.
8. Frenn M, Pruszyński JE, Felzer H, Zhang J. Authoritative feeding behaviors to reduce child BMI through online interventions. *J Spec Pediatr Nurs*. 2013;18(1):65-77.
9. Gifford WA, Davies BL, Graham ID, Tourangeau A, Woodend AK, Lefebvre N. Developing leadership capacity for guideline use: a pilot cluster randomized control trial. *Worldviews Evid Based Nurs*. 2013;10(1):51-65.
10. Jones RB, Goldsmith L, Hewson P, Williams CJ. Recruitment to online therapies for depression: pilot cluster randomized controlled trial. *J Med Internet Res*. 2013;15(3):e45.
11. Moore GF, Williams A, Moore L, Murphy S. An exploratory cluster randomised trial of a university halls of residence based social norms marketing campaign to reduce alcohol consumption among 1st year students. *Subst Abuse Treat Prev Policy*. 2013;8:15.
12. Pai M, Lloyd NS, Cheng J, Thabane L, Spencer FA, Cook DJ, et al. Strategies to enhance venous thromboprophylaxis in hospitalized medical patients (SENTRY): a pilot cluster randomized trial. *Implement Sci*. 2013;8:1.
13. Reeves R, West E, Barron D. Facilitated patient experience feedback can improve nursing care: a pilot study for a phase III cluster randomised controlled trial. *BMC Health Serv Res*. 2013;13:259.
14. Teut M, Schnabel K, Baur R, Kerckhoff A, Reese F, Pilgram N, et al. Effects and feasibility of an Integrative Medicine program for geriatric patients-a cluster-randomized pilot study. *Clin Interv Aging*. 2013;8:953-61.
15. Jago R, Sebire SJ, Davies B, Wood L, Edwards MJ, Banfield K, et al. Randomised feasibility trial of a teaching assistant led extracurricular physical activity intervention for 9 to 11 year olds: Action 3:30. *Int J Behav Nutr Phys Act*. 2014;11:114.
16. Michie L, Cameron ST, Glasier A, Larke N, Muir A, Lorimer A. Pharmacy-based interventions for initiating effective contraception following the use of emergency contraception: a pilot study. *Contraception*. 2014;90(4):447-53.

- 1
- 2
- 3
- 4 17. Mytton J, Ingram J, Manns S, Stevens T, Mulvaney C, Blair P, et al. The feasibility of using a
- 5 parenting programme for the prevention of unintentional home injuries in the under-fives: a
- 6 cluster randomised controlled trial. Health Technol Assess. 2014;18(3):1-184.
- 7 18. Thomas LH, Watkins CL, Sutton CJ, Forshaw D, Leathley MJ, French B, et al. Identifying
- 8 continence options after stroke (ICONS): a cluster randomised controlled feasibility trial.
- 9 Trials. 2014;15:509.
- 10
- 11
- 12
- 13
- 14
- 15
- 16
- 17
- 18
- 19
- 20
- 21
- 22
- 23
- 24
- 25
- 26
- 27
- 28
- 29
- 30
- 31
- 32
- 33
- 34
- 35
- 36
- 37
- 38
- 39
- 40
- 41
- 42
- 43
- 44
- 45
- 46
- 47
- 48
- 49
- 50
- 51
- 52
- 53
- 54
- 55
- 56
- 57
- 58
- 59
- 60

For peer review only



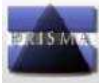

# PRISMA 2009 Checklist

1  
2  
3  
4  
5  
6  
7  
8  
9  
10  
11  
12  
13  
14  
15  
16  
17  
18  
19  
20  
21  
22  
23  
24  
25  
26  
27  
28  
29  
30  
31  
32  
33  
34  
35  
36  
37  
38  
39  
40  
41  
42  
43  
44  
45  
46  
47  
48  
49

| Section/topic                      | #  | Checklist item                                                                                                                                                                                                                                                                                              | Reported on page #                |
|------------------------------------|----|-------------------------------------------------------------------------------------------------------------------------------------------------------------------------------------------------------------------------------------------------------------------------------------------------------------|-----------------------------------|
| <b>TITLE</b>                       |    |                                                                                                                                                                                                                                                                                                             |                                   |
| Title                              | 1  | Identify the report as a systematic review, meta-analysis, or both.                                                                                                                                                                                                                                         | 1                                 |
| <b>ABSTRACT</b>                    |    |                                                                                                                                                                                                                                                                                                             |                                   |
| Structured summary                 | 2  | Provide a structured summary including, as applicable: background; objectives; data sources; study eligibility criteria, participants, and interventions; study appraisal and synthesis methods; results; limitations; conclusions and implications of key findings; systematic review registration number. | 1, 2                              |
| <b>INTRODUCTION</b>                |    |                                                                                                                                                                                                                                                                                                             |                                   |
| Rationale                          | 3  | Describe the rationale for the review in the context of what is already known.                                                                                                                                                                                                                              | 3                                 |
| Objectives                         | 4  | Provide an explicit statement of questions being addressed with reference to participants, interventions, comparisons, outcomes, and study design (PICOS).                                                                                                                                                  | 3                                 |
| <b>METHODS</b>                     |    |                                                                                                                                                                                                                                                                                                             |                                   |
| Protocol and registration          | 5  | Indicate if a review protocol exists, if and where it can be accessed (e.g., Web address), and, if available, provide registration information including registration number.                                                                                                                               | 5                                 |
| Eligibility criteria               | 6  | Specify study characteristics (e.g., PICOS, length of follow-up) and report characteristics (e.g., years considered, language, publication status) used as criteria for eligibility, giving rationale.                                                                                                      | 3, 4                              |
| Information sources                | 7  | Describe all information sources (e.g., databases with dates of coverage, contact with study authors to identify additional studies) in the search and date last searched.                                                                                                                                  | 4                                 |
| Search                             | 8  | Present full electronic search strategy for at least one database, including any limits used, such that it could be repeated.                                                                                                                                                                               | Appendix 1                        |
| Study selection                    | 9  | State the process for selecting studies (i.e., screening, eligibility, included in systematic review, and, if applicable, included in the meta-analysis).                                                                                                                                                   | 4                                 |
| Data collection process            | 10 | Describe method of data extraction from reports (e.g., piloted forms, independently, in duplicate) and any processes for obtaining and confirming data from investigators.                                                                                                                                  | 5, 6                              |
| Data items                         | 11 | List and define all variables for which data were sought (e.g., PICOS, funding sources) and any assumptions and simplifications made.                                                                                                                                                                       | Appendix 2                        |
| Risk of bias in individual studies | 12 | Describe methods used for assessing risk of bias of individual studies (including specification of whether this was done at the study or outcome level), and how this information is to be used in any data synthesis.                                                                                      | N/A – review of reporting quality |
| Summary measures                   | 13 | State the principal summary measures (e.g., risk ratio, difference in means).                                                                                                                                                                                                                               | N/A –                             |

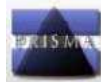

## PRISMA 2009 Checklist

Page 1 of 2

|                               |    |                                                                                                                                                                                                          | review of reporting quality       |
|-------------------------------|----|----------------------------------------------------------------------------------------------------------------------------------------------------------------------------------------------------------|-----------------------------------|
| Synthesis of results          | 14 | Describe the methods of handling data and combining results of studies, if done, including measures of consistency (e.g., $I^2$ ) for each meta-analysis.                                                | N/A – review of reporting quality |
| Page 1 of 2                   |    |                                                                                                                                                                                                          |                                   |
| Section/topic                 | #  | Checklist item                                                                                                                                                                                           | Reported on page #                |
| Risk of bias across studies   | 15 | Specify any assessment of risk of bias that may affect the cumulative evidence (e.g., publication bias, selective reporting within studies).                                                             | N/A – review of reporting quality |
| Additional analyses           | 16 | Describe methods of additional analyses (e.g., sensitivity or subgroup analyses, meta-regression), if done, indicating which were pre-specified.                                                         | N/A – review of reporting quality |
| <b>RESULTS</b>                |    |                                                                                                                                                                                                          |                                   |
| Study selection               | 17 | Give numbers of studies screened, assessed for eligibility, and included in the review, with reasons for exclusions at each stage, ideally with a flow diagram.                                          | 6, 7, Figure 1                    |
| Study characteristics         | 18 | For each study, present characteristics for which data were extracted (e.g., study size, PICOS, follow-up period) and provide the citations.                                                             | 7, Table 1, Appendix 3            |
| Risk of bias within studies   | 19 | Present data on risk of bias of each study and, if available, any outcome level assessment (see item 12).                                                                                                | N/A – review of reporting quality |
| Results of individual studies | 20 | For all outcomes considered (benefits or harms), present, for each study: (a) simple summary data for each intervention group (b) effect estimates and confidence intervals, ideally with a forest plot. | N/A – review of reporting         |



# PRISMA 2009 Checklist

1  
2  
3  
4  
5  
6  
7  
8  
9  
10  
11  
12  
13  
14  
15  
16  
17  
18  
19  
20  
21  
22  
23  
24  
25  
26  
27  
28  
29  
30  
31  
32  
33  
34  
35  
36  
37  
38  
39  
40  
41  
42  
43  
44  
45  
46  
47  
48  
49

|                             |    |                                                                                                                                                                                      |                                   |
|-----------------------------|----|--------------------------------------------------------------------------------------------------------------------------------------------------------------------------------------|-----------------------------------|
|                             |    |                                                                                                                                                                                      | quality                           |
| Synthesis of results        | 21 | Present results of each meta-analysis done, including confidence intervals and measures of consistency.                                                                              | N/A – review of reporting quality |
| Risk of bias across studies | 22 | Present results of any assessment of risk of bias across studies (see Item 15).                                                                                                      | N/A – review of reporting quality |
| Additional analysis         | 23 | Give results of additional analyses, if done (e.g., sensitivity or subgroup analyses, meta-regression [see Item 16]).                                                                | N/A – review of reporting quality |
| <b>DISCUSSION</b>           |    |                                                                                                                                                                                      |                                   |
| Summary of evidence         | 24 | Summarize the main findings including the strength of evidence for each main outcome; consider their relevance to key groups (e.g., healthcare providers, users, and policy makers). | 9, 10, 11                         |
| Limitations                 | 25 | Discuss limitations at study and outcome level (e.g., risk of bias), and at review-level (e.g., incomplete retrieval of identified research, reporting bias).                        | 12                                |
| Conclusions                 | 26 | Provide a general interpretation of the results in the context of other evidence, and implications for future research.                                                              | 11                                |
| <b>FUNDING</b>              |    |                                                                                                                                                                                      |                                   |
| Funding                     | 27 | Describe sources of funding for the systematic review and other support (e.g., supply of data); role of funders for the systematic review.                                           | 13                                |

From: Moher D, Liberati A, Tetzlaff J, Altman DG, The PRISMA Group (2009). Preferred Reporting Items for Systematic Reviews and Meta-Analyses: The PRISMA Statement. PLoS Med 6(6): e1000097. doi:10.1371/journal.pmed1000097

For more information, visit: [www.prisma-statement.org](http://www.prisma-statement.org).

# BMJ Open

## The Quality of Reporting of Pilot and Feasibility Cluster Randomised Trials: A Systematic Review

|                                 |                                                                                                                                                                                                                                  |
|---------------------------------|----------------------------------------------------------------------------------------------------------------------------------------------------------------------------------------------------------------------------------|
| Journal:                        | <i>BMJ Open</i>                                                                                                                                                                                                                  |
| Manuscript ID                   | bmjopen-2017-016970.R2                                                                                                                                                                                                           |
| Article Type:                   | Research                                                                                                                                                                                                                         |
| Date Submitted by the Author:   | 14-Jul-2017                                                                                                                                                                                                                      |
| Complete List of Authors:       | Chan, Claire; Barts & The London School of Medicine and Dentistry, Leyrat, Clémence; London School of Hygiene and Tropical Medicine Eldridge, Sandra; Queen Mary University of London, Centre for Primary Care and Public Health |
| <b>Primary Subject Heading</b>: | Research methods                                                                                                                                                                                                                 |
| Secondary Subject Heading:      | Medical publishing and peer review                                                                                                                                                                                               |
| Keywords:                       | PRIMARY CARE, STATISTICS & RESEARCH METHODS, EDUCATION & TRAINING (see Medical Education & Training)                                                                                                                             |
|                                 |                                                                                                                                                                                                                                  |

SCHOLARONE™  
Manuscripts

Peer review only

# The Quality of Reporting of Pilot and Feasibility Cluster Randomised Trials: A Systematic Review

Claire L Chan, Statistician <sup>1\*</sup>, Clémence Leyrat, Research Fellow in Statistics <sup>2</sup>, Sandra M Eldridge, Professor <sup>1</sup>

1 Centre for Primary Care and Public Health, Queen Mary University of London, London, UK, E1 2AB

2 Department of Medical Statistics, London School of Hygiene and Tropical Medicine, London, UK, WC1E 7HT

Corresponding author\*

Email: [c.l.chan@qmul.ac.uk](mailto:c.l.chan@qmul.ac.uk)

## ABSTRACT

**Objectives:** To systematically review the quality of reporting of pilot and feasibility CRTs. In particular, to assess (1) the number of pilot CRTs conducted between 01/01/2011 and 31/12/2014, (2) whether objectives and methods are appropriate and (3) reporting quality.

**Methods:** We searched PubMed (2011-2014) for CRTs with 'pilot' or 'feasibility' in the title or abstract; that were assessing some element of feasibility; and showing evidence the study was in preparation for a main effectiveness/efficacy trial. Quality assessment criteria were based on the Consolidated Standards of Reporting Trials (CONSORT) extensions for pilot trials and CRTs.

**Results:** Eighteen pilot CRTs were identified. Forty-four percent did not have feasibility as their primary objective, and many (50%) performed formal hypothesis testing for effectiveness/efficacy despite being underpowered. Most (83%) included 'pilot' or 'feasibility' in the title, and discussed implications for progression from the pilot to the future definitive trial (89%), but fewer reported reasons for the randomised pilot trial (39%), sample size rationale (44%), or progression criteria (17%). Most defined the cluster (100%), and number of clusters randomised (94%), but few reported how the cluster design affected sample size (17%), whether consent was sought from clusters (11%), or who enrolled clusters (17%).

1  
2  
3 **Conclusions:** That only 18 pilot CRTs were identified necessitates increased awareness of the  
4 importance of conducting and publishing pilot CRTs and improved reporting. Pilot CRTs should  
5 primarily be assessing feasibility, avoiding formal hypothesis testing for effectiveness/efficacy, and  
6 reporting reasons for the pilot, sample size rationale, and progression criteria, as well as enrolment  
7 of clusters, and how the cluster design affects design aspects. We recommend adherence to the  
8 CONSORT extensions for pilot trials and CRTs.  
9  
10  
11  
12  
13

#### 14 **Article summary**

##### 15 **Strengths and limitations of this study**

- 16
- 17
- 18
- 19
- 20
- 21 • We used a robust search and data extraction procedure, including validation of the  
22 screening/sifting process and double data extraction.
- 23
- 24 • We may have missed some studies, since our criteria excluded studies not including 'pilot'  
25 or 'feasibility' in the title or abstract, and those not clearly in preparation for a main trial.  
26  
27  
28

## 29 **BACKGROUND**

30  
31  
32  
33  
34 In a cluster randomised trial (CRT) clusters, rather than individuals, are the units of randomisation. A  
35 cluster is a group (usually predefined) of one or more individuals. For example, clusters could be  
36 hospitals and the individuals, the patients within those hospitals. CRTs are often chosen for logistical  
37 reasons, prevention of contamination across individuals, or because the intervention is targeted at  
38 the cluster level. CRTs are useful for evaluating complex interventions. However, they have added  
39 complexity in terms of design, implementation, and analysis and so it is important to ensure that  
40 carrying out a CRT is feasible before conducting the future definitive trial.[1]  
41  
42  
43  
44  
45

46  
47 A feasibility study conducted in advance of a future definitive trial is a study designed to answer the  
48 question about whether the study can be done and whether one should proceed with it. A pilot  
49 study answers the same question but in such a study part or all of the future trial is carried out on a  
50 smaller scale.[2] Thus all pilot studies are also feasibility studies. Pilot studies can be randomised or  
51 non-randomised; for brevity we use the term pilot CRT throughout this paper to refer to a  
52 randomised study with a clustered design that is in preparation for a future definitive trial assessing  
53 effectiveness/efficacy.[3, 4] The focus of pilot trials is on investigating areas of uncertainty about the  
54  
55  
56  
57  
58  
59  
60

1  
2  
3 future definitive trial to see whether it is feasible to carry out, so the data, methods, and analysis are  
4 different from an effectiveness/efficacy trial. In particular, more data might be collected on items  
5 such as recruitment and retention to assess feasibility, methods may include specifying criteria to  
6 judge whether to proceed with the future definitive trial, and analysis is likely to be based on  
7 descriptive statistics since the study is not powered for formal hypothesis testing for  
8 effectiveness/efficacy.  
9  
10  
11  
12

13  
14 Arnold et al. highlight the importance of pilot studies being of high quality.[5] Good reporting quality  
15 is essential to show how the pilot has informed the future definitive trial as well as to allow readers  
16 to use the results in preparing for similar future trials. The number of pilot and feasibility studies in  
17 the literature is increasing. However, Arain et al. indicate that reporting of pilot studies is poor.[6]  
18 There are no previous reviews of the reporting quality of pilot CRTs, despite the extra complications  
19 arising from the clustered structure. The aim of this review is to reveal the quality of reporting of  
20 pilot CRTs published between 01/01/2011 and 31/12/2014. We extracted information to describe  
21 the sample of pilot CRTs and to assess quality, with quality criteria based on the Consolidated  
22 Standards of Reporting Trials (CONSORT) extension for CRTs,[7] and a CONSORT extension for pilot  
23 trials which SE and CC were involved in the final stages of development of during this review.[3, 4]  
24 We present recommendations for improving the conduct, analysis and reporting of these studies  
25 and expect this to improve the quality, usefulness and interpretation of pilot CRTs in the future. We  
26 know current reporting of CRTs is suboptimal,[8-11] and thus we expected the reporting of pilot  
27 CRTs to be even poorer.  
28  
29  
30  
31  
32  
33  
34  
35  
36  
37  
38

39 The questions addressed by this review are:

- 40 1) How many pilot CRTs have been conducted between 01/01/2011 and 31/12/2014?
  - 41 2) Are pilot CRTs using appropriate objectives and methods?
  - 42 3) To what extent is the quality of reporting of pilot CRTs sufficient?
- 43  
44  
45

## 46 **METHODS**

### 47 **Inclusion and exclusion criteria**

48 We included papers published in English with a publication date (print or electronic) between  
49 01/01/2011 and 31/12/2014. We chose the start date to be after the updated CONSORT 2010 was  
50 published.[12] We estimated a search covering four years would give us a reasonable number of  
51 papers to perform our quality assessment, and that later papers would be similar in terms of quality  
52  
53  
54  
55  
56  
57  
58  
59  
60

1  
2  
3 of reporting since the CONSORT for pilot trials was not published until the end of 2016. The study  
4 had to be a CRT, have the word 'pilot' or 'feasibility' in the title or abstract, be assessing some  
5 element of feasibility, and show evidence that the study was in preparation for a specific trial  
6 assessing effectiveness/efficacy that is planned to go ahead if the pilot trial suggests it is feasible (i.e.  
7 not just a general assessment of feasibility issues to help researchers in general, although pilot trials  
8 may do this as an addition). Regardless of how authors described a study, we did not consider it to  
9 be a pilot trial if it was *only* looking at effectiveness/efficacy because we wanted to exclude those  
10 studies that claim to be a pilot/feasibility trial simply as justification for small sample size.[13] The  
11 paper had to be reporting results (i.e. not a protocol or statistical analysis plan) and had to be the  
12 first published paper reporting pilot outcomes (i.e. not an extension/follow-up study for a pilot study  
13 already reported, and not a second paper reporting further pilot outcomes). Interim analyses,  
14 analyses before the study was complete, and internal pilots were excluded; the CONSORT extension  
15 for pilot trials on which we based the quality assessment does not apply to internal pilots.[3, 4] No  
16 studies were excluded on the basis of quality since the aim was to assess the quality of reporting.  
17  
18  
19  
20  
21  
22  
23  
24  
25  
26

#### 27 **Data sources and search methods**

28 We searched PubMed for relevant papers in September 2015. We searched for the words 'pilot' or  
29 'feasibility' in the title or abstract, a search strategy similar to that used by Lancaster et al. [14] We  
30 combined this with a search strategy to identify CRTs; this was similar to the strategy used by Diaz-  
31 Ordaz et al. [8] The full electronic search strategy is given in Appendix 1.  
32  
33  
34  
35  
36

#### 37 **Sifting and validation**

38 The titles and abstracts of all papers identified by the electronic search were screened by CC for  
39 possible inclusion. Full texts were obtained for those papers identified as definitely or possibly  
40 satisfying the inclusion criteria and sifted by CC for inclusion. As validation, CL carried out the same  
41 screening and sifting process independently on a 10% random sample of electronically identified  
42 papers. For full texts where there was uncertainty whether the paper should be included, it was  
43 referred to SE for a final decision.  
44  
45  
46  
47  
48  
49

#### 50 **Refining the inclusion process**

51 We refined the screening and sifting process following piloting. In particular we rejected a more  
52 restrictive PubMed search that required 'pilot' or 'feasibility' in the title rather than allowing these  
53 words to occur in the title *or* abstract because this missed relevant papers; we altered the order of  
54 the exclusion criteria to make the process more streamline; and we relaxed one inclusion criteria,  
55  
56  
57  
58  
59  
60



1  
2  
3 requiring evidence that the pilot trial was in preparation for a future definitive trial rather than an  
4 explicit statement that authors were planning a future definitive trial. The protocol was updated,  
5 and is available from the corresponding author.  
6  
7  
8

### 9 **Data Extraction**

10 CC and CL independently extracted data from all papers selected for inclusion in the review, and  
11 followed rules on what to extract (see Further information column of Appendix 2). Extracted data  
12 were recorded in an Excel spreadsheet. Discrepancies were resolved by discussion between CC and  
13 CL, and where agreement could not be reached a final decision was made by SE.  
14  
15  
16  
17

18  
19 For each pilot CRT included in the review, we extracted information to describe the trials, including  
20 publication date (print date unless there was an earlier electronic date), country in which the trial  
21 was set, number of clusters randomised, method of cluster randomisation and, following the  
22 CONSORT extension for pilot trials' recommendation to focus on objectives rather than outcomes,  
23 the primary objective. We defined the primary objective using method similar to that used by Diaz-  
24 Ordaz *et al.*[8] for primary outcomes i.e. as that specified by the author, else the objective used in  
25 the sample size justification, or else the first objective mentioned in the abstract or else main text.  
26  
27  
28  
29  
30  
31

32 To assess whether the pilot trials were using appropriate objectives and methods, we collected  
33 information on whether the primary objective was about feasibility, the method used to address the  
34 main feasibility objective, the rationale for numbers in the pilot trial, and whether there was formal  
35 hypothesis testing for, or statements about, effectiveness/efficacy without a caveat about the small  
36 sample size.  
37  
38  
39  
40  
41

42 To assess reporting quality, we created a list of quality assessment items based on the CONSORT  
43 extension for pilot trials.[3, 4] We also looked at the CONSORT extension for CRTs,[7] and  
44 incorporated any cluster-specific items into our quality assessment items. Where a CRT item became  
45 less relevant in the context of a pilot trial, we did not extract it (e.g. whether variation in cluster sizes  
46 was formally considered in the sample size calculation). In addition, where there was a substantial  
47 difference between the item for the CONSORT extension for CRTs and that for the pilot trial  
48 extension and the items were not compatible, we used the latter item (e.g. focusing on objectives  
49 rather than outcomes). We recognised the need to balance comprehensiveness and feasibility.[11]  
50 Therefore, where items referred to objectives or methods, we extracted this for the primary  
51 objective only. We also did not extract on whether papers reported a structured summary of trial  
52  
53  
54  
55  
56  
57  
58  
59  
60

1  
2  
3 design, methods, results, and conclusions. The final version of the full list of data extracted, and  
4 further information on each item extracted, is included in Appendix 2.  
5  
6

### 7 8 **Refining data extraction**

9  
10 Initially CC extracted data on a random 10% sample of papers. However, some of the items were  
11 difficult to extract in a clear, standardised way, as similarly noted by Ivers et al,[11] so these items  
12 were removed. In particular: whether the objectives, intervention, or allocation concealment were  
13 at the individual level, cluster level, or both; and other analyses performed or other unintended  
14 consequences (difficult to decipher from papers whether it classified as an 'other'). Furthermore,  
15 some items were deemed easier to extract if split into two items, for example; 'reported why the  
16 pilot trial ended/stopped' which we subsequently split into 'reported the pilot trial ended/stopped'  
17 and 'if so, what was the reason'.  
18  
19  
20  
21  
22

### 23 24 **Analysis**

25  
26  
27 Data were analysed using Excel version 2013. We describe the characteristics of the pilot CRTs using  
28 descriptive statistics. Where we extracted text, we established categories during analysis by  
29 grouping similar data, for example grouping the different primary objectives. To assess adherence to  
30 the CONSORT checklists, we present the number and percentage reporting each item. This report  
31 adheres, where appropriate, to the Preferred Reporting Items for Systematic reviews and Meta-  
32 Analyses (PRISMA) statement.[15]  
33  
34  
35  
36  
37

### 38 39 **Patient involvement**

40  
41  
42 No patients were involved in the development of the research question, design or conduct of the  
43 study, interpretation or reporting. No patients were recruited for this study. There are no plans to  
44 disseminate results of the research to study participants.  
45  
46  
47

## 48 49 **RESULTS**

50  
51  
52 The electronic PubMed search identified 257 published papers. We rejected 108 during screening  
53 (29 not reporting results; 32 not about a single randomised trial; 46 not cluster randomised; 1  
54 interim analysis). The remaining 149 full-text articles were assessed for eligibility, and 131 more  
55 papers were rejected (1 not reporting results; 13 not about a single randomised trial; 25 not cluster  
56  
57  
58  
59  
60

1  
2  
3 randomised; 8 analyses before study complete/internal pilot; 32 not assessing feasibility; 50 not in  
4 preparation for a future definitive effectiveness/efficacy trial; 2 not the first published paper  
5 reporting pilot outcomes). This left 18 studies to be included in the analysis.[A1-A18]. The full list of  
6 studies is included in Table 1, with citations in Appendix 3. Figure 1 shows the flow diagram of the  
7 identification process for the sample of 18 pilot CRTs.  
8  
9  
10

11  
12  
13 There was 96% agreement between CC and CL for the 10% random sample used for the screening  
14 and sifting validation (based on 26 papers), with a kappa coefficient of 0.84.  
15  
16

### 17 **Trial characteristics**

18  
19 In general, the more recent the publication date, the more pilot CRTs were identified, but with the  
20 most identified in 2013 (Table 2). Of the 18 included studies, the majority (56%) were set in the UK.  
21 All other countries were represented only once except for Canada (3 trials) and USA (2 trials). Of  
22 those reporting the method of randomisation, the majority (69%) used stratified with blocked  
23 randomisation. The median number of clusters randomised was 8 (IQR: 4 to 16) with a range from 2  
24 to 50.  
25  
26  
27  
28  
29

### 30 **Pilot trial objectives and methods**

31  
32 Ten (56%) of the 18 included pilot trials had feasibility as their primary objective, for example  
33 assessing feasibility of implementing the intervention (6 trials), of recruitment and retention (3  
34 trials), and of the cluster design (1 trial) (Table 3). All ten trials reported a corresponding measure to  
35 assess the feasibility objective; most (90%) used descriptive statistics and/or qualitative methods to  
36 address the objective. In one trial a statistical test was used to address their primary feasibility  
37 objective without the authors designing the study to be adequately powered to do so.  
38  
39  
40  
41  
42

43  
44 The remaining eight trials had an effectiveness/efficacy primary objective, and used statistical tests  
45 to address this. Nevertheless these eight trials all had feasibility as one of their other objectives (this  
46 was an inclusion criterion). The feasibility objectives were similar to those where the feasibility was  
47 primary, but expressed more generally in two trials, for example, looking at the feasibility of the  
48 future definitive trial,[A16] and looking at whether the future definitive trial could answer the  
49 effectiveness question and which study design would enable this.[A10] In only three trials was a  
50 measure to assess the feasibility objective reported, using either quantitative or qualitative  
51 measures.  
52  
53  
54  
55  
56  
57  
58  
59  
60

1  
2  
3 Eight trials reported a rationale for the numbers in the pilot trial, with all of these following best  
4 practice in not basing the rationale on a formal sample size calculation for effectiveness/efficacy.  
5  
6 Nine (50%) trials performed any formal hypothesis testing for effectiveness/efficacy, regardless of  
7  
8 whether this was for the primary or a secondary objective. Of these nine trials, four of the  
9  
10 conclusions about effectiveness/efficacy were made without any caveats about the imprecision of  
11  
12 estimates or possible lack of representativeness because of the small samples.

### 13 14 **Quality of reporting – by items**

15  
16 The pilot CRTs in our review are published after the CONSORT 2010 for RCTs but before the  
17  
18 CONSORT extension for pilot trials. Therefore, to present data on quality of reporting, we looked at  
19  
20 our list of quality assessment items based on the CONSORT extension for pilot trials, and grouped  
21  
22 reporting items into three categories (Table 4): (1) items in the CONSORT extension for pilot trials  
23  
24 that are new compared to CONSORT 2010 for RCTs, (2) items in the CONSORT extension for pilot  
25  
26 trials that are substantially adapted from CONSORT 2010 for RCTs and (3) items in the CONSORT  
27  
28 extension for pilot trials that are the same as or have only minor differences from CONSORT 2010 for  
29  
30 RCTs, plus items in the CONSORT extension for CRTs.[3, 4, 7, 12]

31  
32 In the tables, denominators for proportions are based on papers for which the item is relevant. Not  
33  
34 all items are relevant for all trials, due to their design, so we highlight where this applies in the table  
35  
36 footnotes. The footnote of Table 4 also explains where the quality assessment items come from,  
37  
38 with different font differentiating items based on the CONSORT extension for pilot trials and the  
39  
40 CONSORT extension for CRTs, and a key to highlight which of the three categories above the item  
41  
42 falls under.

### 43 44 **New items**

45  
46 Five new items were added to the CONSORT extension for pilot trials on the identification and  
47  
48 consent process, progression criteria, other unintended consequences, implications for progression,  
49  
50 and ethical approval.[3, 4] See items with [N] in column 2 of Table 4. In our review, how participants  
51  
52 were identified and consented was reported by 50% and 76% of the pilot CRTs, respectively, but  
53  
54 how clusters were identified and consented was reported by just 33% and 11%, respectively. Only 3  
55  
56 trials (17%) reported criteria used to judge whether or how to proceed with the future definitive  
57  
58 trial, with two giving numbers that must be exceeded such as recruitment, retention, attendance,  
59  
60 and data collection percentages,[A17, A2] and one giving categories of “definitely feasible”,

1  
2  
3 “possibly feasible”, and “not feasible”.[A12] The item on other unintended consequences was  
4 reported by none of the pilot CRTs, although it is unclear whether this is due to poor reporting or  
5 because no unintended consequences occurred. Implications for progression from pilot to future  
6 definitive trial was reported by 16 trials (89%), with nine reporting to proceed/proceed with  
7 changes, five reporting further research or piloting is needed first, and two reporting to not go  
8 ahead with the future definitive trial. 94% reported ethical approval/research review committee  
9 approval, but only 47% of them also reported the corresponding reference number.  
10  
11

#### 12 Substantially adapted items

13  
14  
15  
16 Six items in the CONSORT extension for pilot trials were substantially adapted from CONSORT 2010  
17 for RCTs, regarding reasons for the randomised pilot trial, sample size rationale for the pilot trial,  
18 numbers approached and/or assessed for eligibility, remaining uncertainty about feasibility,  
19 generalisability of pilot trial methods and findings, and where the pilot trial protocol can be  
20 accessed.[3, 4] See items with [S] in column 2 of Table 4. Reasons for the randomised pilot trial were  
21 reported by 39% of the pilot CRTs. Eight trials (44%) gave a rationale for the sample size of the pilot  
22 trial. Pilot trials should always report a rationale for their sample size; this can be qualitative or  
23 quantitative, but shouldn't be based on a formal sample size calculation for effectiveness/efficacy. In  
24 this review, the rationales were based on logistics,[A15] resources,[A14] time,[A16] a balance of  
25 practicalities and need for reasonable precision,[A18] a general statement that it was considered  
26 sufficient to address the objectives of the pilot trial,[A17] formal [A6] and non-formal [A7]  
27 calculation to enable estimation of parameters in the future definitive trial, and a formal calculation  
28 based on the primary feasibility outcome.[A12] Of these rationales, good examples include “The  
29 decision to include eight apartment-sharing communities was based on practical feasibility that  
30 seemed appropriate according to funding and the personal resources available”,[A14] as well as  
31 “The sample size was chosen in order to have two clusters per randomized treatment and the  
32 number of participants per cluster was based on the number of degrees of freedom needed within  
33 each cluster to have reasonable precision to estimate a variance”.[A6] The number of individuals  
34 approached and/or assessed for eligibility was reported by 47%, and the number of clusters by 56%.  
35 Remaining uncertainty was reported by 56% of the pilot CRTs. 89% reported generalisability of pilot  
36 trial methods/findings to the future definitive trial or other studies, but clarity of reporting was  
37 lacking as it was difficult to distinguish between references to the future definitive trial versus other  
38 future studies due to ambiguous phrases such as “in a future trial”. Only 39% reported where the  
39 pilot trial protocol could be accessed.  
40  
41  
42  
43  
44  
45  
46  
47  
48  
49  
50  
51  
52  
53  
54  
55  
56  
57  
58  
59  
60

1  
2  
3  
4  
5  
6  
7  
8  
9  
10  
11  
12  
13  
14  
15  
16  
17  
18  
19  
20  
21  
22  
23  
24  
25  
26  
27  
28  
29  
30  
31  
32  
33  
34  
35  
36  
37  
38  
39  
40  
41  
42  
43  
44  
45  
46  
47  
48  
49  
50  
51  
52  
53  
54  
55  
56  
57  
58  
59  
60

Items essentially taken from CONSORT 2010 for RCTs or the CONSORT extension for CRTs

For the remaining items, reporting quality was variable. Some were reported by fewer than 20% of the pilot CRTs, for example considering the cluster design in the sample size rationale for the pilot trial (17%) (item 7a), reporting whether consent was sought from clusters (11%) and who enrolled them (17%) (items 10c and 10a), how people were blinded (7% of applicable trials) (item 11a), number of excluded individuals (6% of applicable trials) and clusters (18% of applicable trials) after randomisation (item 13b), and a table showing baseline cluster characteristics (11%) (item 15). Those reported most well, by more than 80% of the pilot CRTs, included reporting 'pilot' or 'feasibility' in the title (83%) (item 1a), scientific background and explanation of rationale for future definitive trial (100%) (item 2a), pilot trial design (100%) (item 3a), nature of the cluster (100%) (item 3a), settings and locations where the data were collected (100%) (item 4b), whether consent was sought from participants (94%) (item 10c), number of clusters randomised (94%) and assessed for primary objective (82% of applicable trials) (item 13a), number of individuals assessed for primary objective (94% of applicable trials) (item 13a), limitations of pilot trial (94%) (item 20), and source of funding (100%) (item 25).

### Quality of reporting – by study

Finally, in Table 5 we present the number (percentage) of quality assessment items reported by each study. We provide an overall score, as well as a score by categories of CONSORT. The quality of reporting varies across studies, with 5 of the pilot CRTs reporting over 65% of the quality assessment items and 2 of the pilot CRTs reporting under 30%. There does not appear to be a trend of reporting quality with time. Five of the studies report 90% or more of the quality assessment items in the 'discussion and other information' category, and only two studies report less than 50%. Two of the studies report 100% of the items in the 'title and abstract and introduction' category, and five studies report less than 50%. The highest percentage of items reported by a study in the 'methods' category is 66% and the lowest is 14%. Similarly, the highest percentage of items reported by a study in the 'results' category is 78% and the lowest is 18%. Within studies, the category that is best reported tends to be the 'discussion and other information' category (had the highest percentage for 10 of the 18 pilot CRTs).

## DISCUSSION

### Main findings

This is the first study to assess the reporting quality of pilot CRTs using the recently developed CONSORT checklist for pilot trials.[3, 4] Our search strategy and inclusion criteria identified 18 pilot CRTs published between 2011 and 2014. Most studies were published in the UK, perhaps driven by the availability of funding or the large number of CRTs and interest in complex interventions in the UK.

With respect to the pilot CRT objectives and methods, a considerable proportion of papers did not have feasibility as their primary objective. Of the trials reporting a sample size rationale for the pilot, all followed best practice in not carrying out a formal sample size calculation for effectiveness/efficacy, yet a substantial proportion performed formal hypothesis testing for effectiveness/efficacy. This could indicate an inappropriate attachment to hypothesis testing, although many did explain it was an indication of *potential* effectiveness or that the study was underpowered. Investigators wanting to assess effectiveness/efficacy and use statistical tests to do so should be performing a properly powered definitive trial, otherwise there is the potential for misleading conclusions affecting clinical decisions as well as misinformed decisions about the future definitive trial.[16] One may however look at *potential* effectiveness, for example using an interim or surrogate outcome, with a caveat about the lack of power.[3, 4] Moreover, one may include a progression criterion based on potential effect. If so, Eldridge and Kerry recommend any interpretation of potential effect is done by looking at the limits of the confidence interval,[13] and one should also pay attention to features of the pilot which might have biased the result (for example, convenience sampling of clusters). A positive effect finding excluding the null value would still justify the future definitive trial to estimate the effect with greater certainty, but a negative effect finding excluding the null value (i.e. strongly suggesting harm), or even a finding where the clinically important difference is excluded, might suggest not proceeding. It is good practice to pre-state such progression criteria. Finally, one may use estimates from outcome data, for example, as inputs for the sample size calculation for the future definitive trial. In particular, for pilot CRTs we may be interested in estimating the intra-cluster correlation coefficient (ICC), although we note that the ICC estimate from a pilot CRT should not be the only source for the future definitive trial sample size, because of the large amount of imprecision in a pilot trial.[17] Reporting quality of pilot CRTs was variable. Items reported well included reporting the term 'pilot' or 'feasibility' in the title, generalisability of pilot trial methods/findings to the future definitive trial or other studies, and implications for progression from the pilot to the future definitive trial, although clarity could be improved when referring to the future definitive trial rather than other future studies in general.

1  
2  
3 Items least well reported included reasons for the randomised pilot trial, sample size rationale for  
4 the pilot trial, criteria used to judge whether or how to proceed with the future definitive trial, and  
5 where the pilot trial protocol can be accessed. These items are important so that readers can  
6 understand whether the uncertainty they are facing about their future trial has already been  
7 addressed in a pilot, researchers can make sure they have enough patients to achieve the pilot trial  
8 objectives, readers can understand the criteria for progression, and to prevent against selective  
9 reporting.  
10  
11  
12  
13

14  
15  
16 For items related to the cluster aspect of pilot CRTs, most pilot CRTs reported the nature of the  
17 cluster, and the number of clusters randomised and assessed for the primary objective. The items  
18 reported least well included considering the cluster design during the sample size rationale for the  
19 pilot trial, reporting who enrolled clusters and how they were consented, number of exclusions for  
20 clusters after randomisation, and a table showing baseline cluster characteristics. Although the  
21 number of clusters in a pilot trial is usually small it is still important to, for example, describe the  
22 cluster-level characteristics using a baseline table as it may give helpful information important for  
23 planning the future definitive trial. Moreover, while nearly all trial reports described whether  
24 consent was sought from individuals or not, seeking agreement from clusters was only described in a  
25 small minority. The items on agreement and enrolment of clusters, baseline cluster  
26 characteristics, and number of excluded clusters are particularly important to report, since they may  
27 affect assessment of feasibility.  
28  
29  
30  
31  
32  
33  
34  
35

36  
37 If we consider why some items may have been well adhered to and others not, it is interesting to  
38 observe that new items added to the CONSORT extension for pilot trials and items substantially  
39 adapted from CONSORT 2010 for RCTs were in general not well adhered to. This could perhaps be  
40 because of somewhat newer ideas that may not have been considered during design such as  
41 specifying progression criteria and considering a rationale for numbers in the pilot. Alternatively,  
42 perhaps there were aspects sometimes done but not reported due to lack of reporting guidance to  
43 remind authors; for example, the new items on how clusters were identified and consented, other  
44 unintended consequences, and ethical approval/research review committee approval reference  
45 number, and the substantially adapted items on reporting reasons for the pilot trial, number of  
46 individuals approached and/or assessed for eligibility, and where the pilot trial protocol can be  
47 accessed. With the item on unintended consequences, we recognise that investigators are free to  
48 choose what they interpret and report as an unintended consequence. We recommend careful  
49 thought that all unintended consequences that may affect the future definitive trial are reported. It  
50  
51  
52  
53  
54  
55  
56  
57  
58  
59  
60



1  
2  
3 is also interesting to observe that many of the most poorly reported items concerned  
4 methods/design (progression criteria; enrolment and consent of clusters), and in particular,  
5 justification of design aspects (reasons for randomised pilot trial; sample size rationale for pilot trial  
6 including consideration of cluster design). Within studies, the category that is worst reported is the  
7 methods, despite being crucial to allow the reader to judge the quality of the trial.  
8  
9  
10

### 11 **Comparison with other studies**

12  
13 There has not been a previous review of pilot trials using the new CONSORT extension for these  
14 trials.[3, 4] However, the review by Arain et al. looking at pilot and feasibility studies reported that  
15 81% were performing hypothesis testing with sample sizes known to be insufficient,[6] compared to  
16 50% of pilot CRTs in our review. Arain et al. also reported 36% of studies performing sample size  
17 calculations for the pilot. In our review, 17% performed calculations (all based on feasibility  
18 objectives), but if we include those that also correctly reported a rationale for the numbers in the  
19 pilot but without any calculation then this was 44%.  
20  
21  
22  
23  
24  
25  
26

27 The general message that reporting of CRTs is suboptimal still holds.[8-11] The review by Diaz-Ordaz  
28 et al. (2013) of definitive trial CRTs reported that 37% presented a table showing baseline cluster  
29 characteristics, compared to 11% of pilot CRTs in our review. Diaz-Ordaz et al. (2013) also reported  
30 that 27% accounted for clustering in sample size calculations,[8] and a recent review by Fiero et al.  
31 reported 53%.[10] However, just 17% of pilot CRTs in our review considered the cluster design in the  
32 sample size rationale for the pilot trial. Both these CRT reviews reviewed effectiveness/efficacy CRTs,  
33 for which the need to take account of clustering in sample sizes is generally well understood  
34 compared to pilot trials. In pilot trials the rationale for considering the clustered design in deciding  
35 on numbers in the pilot may be different, for example, considering the number of degrees of  
36 freedom needed within each cluster to estimate a variance.[A6] In pilot trials, including a number of  
37 clusters with different characteristics may also be important to get an idea about the  
38 implementation of an intervention across different clusters.  
39  
40  
41  
42  
43  
44  
45  
46  
47

### 48 **Strengths and limitations**

49 We used a robust search and data extraction procedure, including validation of the screening/sifting  
50 process and double data extraction. However, the use of only one database, PubMed, which is  
51 comprehensive but not exhaustive, may have missed eligible papers, and the use of conditions #3,  
52 #5, and #6 (see Appendix 1) may have been restrictive. Our aim was to get a general idea of  
53 reporting issues in the area, though, rather than doing a completely comprehensive search. Our  
54  
55  
56  
57  
58  
59  
60

1  
2  
3 inclusion criteria stipulated that papers must have the word 'pilot' or 'feasibility' in the title or  
4 abstract, so we may have missed some pilot CRTs and thus may have overestimated the percentage  
5 reporting 'pilot' or 'feasibility' in the title. This strategy may also have resulted in a skewed sample of  
6 papers with a greater tendency to adhere to CONSORT guidelines. However, our review suggests  
7 reporting of pilot CRTs need improving, so our conclusion would remain the same. We required  
8 authors to report that the trial was in preparation for a future definitive trial, so we expect that  
9 items related to the future definitive trial (e.g. progression criteria, generalisability, implications)  
10 may be better reported than they would for all publications of pilot CRTs which might include papers  
11 that did not report that they were in preparation for a future definitive trial clearly enough to be  
12 included. During sifting, we identified 32 trials that had 'pilot' or 'feasibility' in the title/abstract, but  
13 were not assessing feasibility. A third of these were identified because they referred to 'pilot' or  
14 'feasibility' at some point in the abstract but it was not in reference to the current trial (e.g. stating  
15 feasibility has already been shown), but the other two thirds were labelled as a pilot or feasibility  
16 trial yet showed no evidence of assessing feasibility and were only assessing effectiveness. This is an  
17 important point as our review may appear to overestimate reporting quality by not including these  
18 studies. That there are underpowered main trials being published as pilot or feasibility studies is  
19 something that the academic community should look to prevent. During sifting, we also identified 50  
20 trials that were assessing feasibility but did not show evidence of being in preparation for a future  
21 definitive trial. Most were assessing the feasibility of implementing an intervention targeted at  
22 members of the public, or discussing feasibility of the intervention with the aim of providing  
23 information to help researchers wanting to implement a similar intervention in similar settings or to  
24 raise questions for future research, rather than being in preparation for a trial assessing  
25 effectiveness/efficacy. Some of these 50 trials also appeared to be small effectiveness studies  
26 labelled as a pilot, usually only mentioning feasibility once or twice throughout the paper, with one  
27 trial explicitly stating that "Because of organizational changes... we had to stop the inclusion after 46  
28 participants, and the study is consequently defined as a pilot study." [18] For the few trials that were  
29 potentially pilot CRTs not reported clearly enough, authors only spoke of future studies in general  
30 rather than clearly specifying the study was in preparation for a specific future definitive trial.  
31 Related to this, it is of interest to know the proportion of our 18 pilot CRTs that are actually followed  
32 by a future definitive trial, and we plan to investigate this in future.  
33  
34  
35  
36  
37  
38  
39  
40  
41  
42  
43  
44  
45  
46  
47  
48  
49  
50  
51

## 52 53 CONCLUSION

54  
55  
56  
57  
58  
59  
60

1  
2  
3 We may have overestimated the reporting quality of pilot CRTs; nevertheless our review  
4 demonstrates that reporting of pilot CRTs need improving. The identification of just 18 pilot CRTs  
5 between 2011 and 2014, mainly from the UK, highlights the need for increased awareness of the  
6 importance of carrying out and publishing pilot CRTs and good reporting so that these studies can be  
7 identified. Pilot CRTs should primarily be assessing feasibility, and avoiding formal hypothesis testing  
8 for effectiveness/efficacy. Improvement is needed in reporting reasons for the pilot, rationale for the  
9 pilot trial sample size, and progression criteria, as well as the enrolment stage of clusters and how  
10 the cluster design affects aspects of design such as numbers of participants. We recommend  
11 adherence to the new CONSORT extension for pilot trials, in conjunction with the CONSORT  
12 extension for CRTs.[3, 4, 7] We encourage journals to endorse the CONSORT statement, including  
13 extensions.  
14  
15  
16  
17  
18  
19  
20  
21  
22  
23

#### 24 **CONTRIBUTORS:**

25 SE conceived the study and advised on the design and protocol. CC developed the design of the study, wrote  
26 the protocol, and designed the screening/sifting and data extraction sheet. CC performed screening and sifting  
27 on all papers identified by the electronic search, and CL carried out validation of the screening/sifting process.  
28 CC and CL performed independent data extraction on all papers included in the review. CC conducted the  
29 analyses of the data and took primary responsibility for writing the manuscript. All authors provided feedback  
30 on all versions of the paper. All authors read and approved the final manuscript. CC is the study guarantor.  
31  
32  
33  
34  
35

#### 36 **COMPETING INTEREST STATEMENT:**

37 All authors have completed the ICMJE uniform disclosure form at [www.icmje.org/coi\\_disclosure.pdf](http://www.icmje.org/coi_disclosure.pdf) and  
38 declare that CC was funded by an NIHR Research Methods Fellowship during this project, and that SE and CC  
39 are authors on the new CONSORT extension for pilot trials.  
40  
41  
42

#### 43 **EXCLUSIVE LICENSE:**

44 The Corresponding Author has the right to grant on behalf of all authors and does grant on behalf of all  
45 authors, an exclusive licence on a worldwide basis to the BMJ Publishing Group Ltd and its Licensees to permit  
46 this article (if accepted) to be published in BMJ Open and any other BMJ PGL products to exploit all subsidiary  
47 rights, as set out in the licence <http://journals.bmj.com/site/authors/editorial-policies.xhtml#copyright> and  
48 the Corresponding Author accepts and understands that any supply made under these terms is made by  
49 BMJ PGL to the Corresponding Author. All articles published in BMJ Open will be made available on an Open  
50 Access basis (with authors being asked to pay an open access fee - see  
51 <http://bmjopen.bmj.com/site/about/resources.xhtml>) Access shall be governed by a Creative Commons  
52 licence – details as to which [Creative Commons](http://creativecommons.org/licenses/by/4.0/) licence will apply to the article are set out in the licence  
53 referred to above.  
54  
55  
56  
57  
58  
59  
60

**FUNDING:**

Claire Chan (nee Coleman) was funded by a National Institute for Health Research (NIHR) Research Methods Fellowship. This article presents independent research funded by the NIHR. The views expressed are those of the authors and not necessarily those of the NHS, the NIHR or the Department of Health. The funder played no role in the study.

**ETHICAL APPROVAL:**

No ethics approval was necessary because this is a review of published literature. No patient data were used in this manuscript.

**DATA SHARING STATEMENT:**

Extraction data are available from the corresponding author.

**TRANSPARENCY DECLARATION:**

This manuscript is an honest, accurate, and transparent account of the study being reported. No important aspects of the study have been omitted, and any discrepancies from the study as planned have been explained.

## REFERENCES

1. Eldridge SM, Ashby D, Feder GS, Rudnicka AR, Ukoumunne OC. Lessons for cluster randomized trials in the twenty-first century: a systematic review of trials in primary care. *Clin Trials*. 2004;1(1):80-90.
2. Eldridge SM, Lancaster GA, Campbell MJ, Thabane L, Hopewell S, Coleman CL, et al. Defining Feasibility and Pilot Studies in Preparation for Randomised Controlled Trials: Development of a Conceptual Framework. *PloS one*. 2016;11(3):e0150205.
3. Eldridge SM, Chan CL, Campbell MJ, Bond CM, Hopewell S, Thabane L, et al. CONSORT 2010 statement: extension to randomised pilot and feasibility trials. *Pilot and Feasibility Studies*. 2016;2(1):64.
4. Eldridge SM, Chan CL, Campbell MJ, Bond CM, Hopewell S, Thabane L, et al. CONSORT 2010 statement: extension to randomised pilot and feasibility trials. *BMJ*. 2016;355(i5239).
5. Arnold DM, Burns KE, Adhikari NK, Kho ME, Meade MO, Cook DJ. The design and interpretation of pilot trials in clinical research in critical care. *Crit Care Med*. 2009;37(1 Suppl):S69-74.
6. Arain M, Campbell MJ, Cooper CL, Lancaster GA. What is a pilot or feasibility study? A review of current practice and editorial policy. *BMC Med Res Methodol*. 2010;10:67.
7. Campbell MK, Piaggio G, Elbourne DR, Altman DG. Consort 2010 statement: extension to cluster randomised trials. *BMJ : British Medical Journal*. 2012;345.
8. Diaz-Ordaz K, Froud R, Sheehan B, Eldridge S. A systematic review of cluster randomised trials in residential facilities for older people suggests how to improve quality. *BMC Med Res Methodol*. 2013;13:127.
9. Díaz-Ordaz K, Kenward MG, Cohen A, Coleman CL, Eldridge S. Are missing data adequately handled in cluster randomised trials? A systematic review and guidelines. *Clinical Trials*. 2014;11(5):590-600.
10. Fiero MH, Huang S, Oren E, Bell ML. Statistical analysis and handling of missing data in cluster randomized trials: a systematic review. *Trials*. 2016;17(1):1.
11. Ivers N, Taljaard M, Dixon S, Bennett C, McRae A, Taleban J, et al. Impact of CONSORT extension for cluster randomised trials on quality of reporting and study methodology: review of random sample of 300 trials, 2000-8. *BMJ*. 2011;343:d5886.
12. Moher D, Hopewell S, Schulz KF, Montori V, Gøtzsche PC, Devereaux PJ, et al. CONSORT 2010 Explanation and Elaboration: updated guidelines for reporting parallel group randomised trials. *BMJ*. 2010;340.
13. Eldridge S, Kerry S. *A Practical Guide to Cluster Randomised Trials in Health Services Research*: Wiley; 2012.
14. Lancaster GA, Dodd S, Williamson PR. Design and analysis of pilot studies: recommendations for good practice. *J Eval Clin Pract*. 2004;10(2):307-12.
15. Moher D, Liberati A, Tetzlaff J, Altman DG. Preferred reporting items for systematic reviews and meta-analyses: the PRISMA statement. *Ann Intern Med*. 2009;151(4):264-9, w64.
16. Kistin C, Silverstein M. Pilot studies: A critical but potentially misused component of interventional research. *JAMA*. 2015;314(15):1561-2.
17. Eldridge SM, Costelloe CE, Kahan BC, Lancaster GA, Kerry SM. How big should the pilot study for my cluster randomised trial be? *Statistical methods in medical research*. 2015:0962280215588242.
18. Mikkelsen LR, Mikkelsen SS, Christensen FB. Early, intensified home-based exercise after total hip replacement--a pilot study. *Physiother Res Int*. 2012;17(4):214-26.

## TABLES

Table 1: Pilot CRTs included in this review

| Author       | Year* | Journal                                                             | Title                                                                                                                                                                   | Cluster                                                             |
|--------------|-------|---------------------------------------------------------------------|-------------------------------------------------------------------------------------------------------------------------------------------------------------------------|---------------------------------------------------------------------|
| Begh [A1]    | 2011  | Trials                                                              | Promoting smoking cessation in Pakistani and Bangladeshi men in the UK: pilot cluster randomised controlled trial of trained community outreach workers                 | Census lower layer super output areas                               |
| Jones [A2]   | 2011  | Pediatric Exercise Science                                          | Promoting fundamental movement skill development and physical activity in early childhood settings: a cluster randomized controlled trial.                              | Childcare centers                                                   |
| Légaré [A3]  | 2010  | Health Expectations                                                 | Training family physicians in shared decision making for the use of antibiotics for acute respiratory infections: a pilot clustered randomized controlled trial.        | Family medicine groups                                              |
| Hopkins [A4] | 2012  | Health Education Research                                           | Implementing organizational physical activity and healthy eating strategies on paid time: process evaluation of the UCLA WORKING pilot study                            | Worksites - health and human service organizations                  |
| Jago [A5]    | 2012  | International Journal of Behavioral Nutrition and Physical Activity | Bristol girls dance project feasibility trial: outcome and process evaluation results                                                                                   | Secondary schools                                                   |
| Taylor [A6]  | 2011  | Clinical Rehabilitation                                             | A pilot cluster randomized controlled trial of structured goal-setting following stroke                                                                                 | Rehabilitation services                                             |
| Drahota [A7] | 2013  | Age and Ageing                                                      | Pilot cluster randomised controlled trial of flooring to reduce injuries from falls in wards for older people.                                                          | Study areas - bays within hospitals                                 |
| Frenn [A8]   | 2013  | Journal for Specialists in Pediatric Nursing                        | Authoritative feeding behaviors to reduce child BMI through online interventions                                                                                        | Classrooms                                                          |
| Gifford [A9] | 2012  | World Views on Evidence-Based Nursing                               | Developing leadership capacity for guideline use: a pilot cluster randomized control trial.                                                                             | Service delivery centers with nursing care for diabetic foot ulcers |
| Jones [A10]  | 2013  | Journal of Medical Internet Research                                | Recruitment to online therapies for depression: pilot cluster randomized controlled trial.                                                                              | Postcode areas                                                      |
| Moore [A11]  | 2013  | Substance Abuse Treatment, Prevention, and Policy                   | An exploratory cluster randomised trial of a university halls of residence based social norms marketing campaign to reduce alcohol consumption among 1st year students. | Residence halls                                                     |
| Pai [A12]    | 2013  | Implementation Science                                              | Strategies to enhance venous thromboprophylaxis in hospitalized medical patients (SENTRY): a pilot cluster randomized trial                                             | Hospitals                                                           |
| Reeves [A13] | 2013  | BMC Health Services Research                                        | Facilitated patient experience feedback can improve nursing care: a pilot study for a phase III cluster randomised controlled trial.                                    | Wards                                                               |
| Teut [A14]   | 2013  | Clinical Interventions in Aging                                     | Effects and feasibility of an Integrative Medicine program for geriatric patients-a cluster-randomized pilot study.                                                     | Shared apartments                                                   |
| Jago [A15]   | 2014  | International Journal of Behavioral Nutrition and Physical Activity | Randomised feasibility trial of a teaching assistant led extracurricular physical activity intervention for 9 to 11 year olds: Action 3:30                              | Primary schools                                                     |
| Michie [A16] | 2014  | Contraception                                                       | Pharmacy-based interventions for initiating effective contraception following the use of emergency contraception: a pilot study                                         | Pharmacies                                                          |
| Mytton [A17] | 2014  | Health Technology Assessment                                        | The feasibility of using a parenting programme for the prevention of unintentional home injuries in the under-fives: a cluster randomised controlled trial.             | Children's centres                                                  |
| Thomas [A18] | 2014  | Trials                                                              | Identifying continence options after stroke (ICONS): a cluster randomised controlled feasibility trial                                                                  | Stroke services                                                     |

\* We extracted the earlier of the print and electronic publication year.

**Table 2: Characteristics of pilot CRTs included in this review**

| Characteristic                                                          | Number of trials (%) |
|-------------------------------------------------------------------------|----------------------|
| Publication year (earlier of the print and electronic publication date) |                      |
| 2010 <sup>a</sup>                                                       | 1 (6)                |
| 2011                                                                    | 3 (17)               |
| 2012                                                                    | 3 (17)               |
| 2013                                                                    | 7 (39)               |
| 2014                                                                    | 4 (22)               |
| Country                                                                 |                      |
| UK                                                                      | 10 (56)              |
| Canada                                                                  | 3 (17)               |
| USA                                                                     | 2 (11)               |
| Germany                                                                 | 1 (6)                |
| New Zealand                                                             | 1 (6)                |
| Australia                                                               | 1 (6)                |
| Method of cluster randomisation <sup>b</sup>                            |                      |
| Simple                                                                  | 1 (8)                |
| Stratified with blocks                                                  | 9 (69)               |
| Blocked only                                                            | 2 (15)               |
| Bias coin method                                                        | 1 (8)                |
| Number of clusters randomised <sup>c</sup>                              |                      |
| Median (IQR)                                                            | 8 (4 to 16)          |
| Range                                                                   | 2 to 50              |
| Average cluster size <sup>d</sup>                                       |                      |
| Median (IQR)                                                            | 32 (14 to 82)        |
| Range                                                                   | 7 to 588             |

<sup>a</sup> 1 paper has an extracted publication year outside of the 2011 to 2014 range. This is because the print publication date for this paper was 2011 but the online publication date was 2010, so the paper satisfies the inclusion criteria which states that the publication date, print or electronic, must be between 2011 and 2014, but we extract the earlier of the print and electronic dates.

<sup>b</sup> 13 of the 18 trials reported their method of randomisation. Percentages are given as a percentage of these 13 trials.

<sup>c</sup> Not reported for 1 trial.

<sup>d</sup> Defined as number of individuals randomised divided by number of clusters randomised, based on 12 trials that reported information on both.

**Table 3: Pilot trial objectives and methods**

| Characteristic                                                                                                  | Number of trials (%) |
|-----------------------------------------------------------------------------------------------------------------|----------------------|
| Primary objective is feasibility <sup>1</sup>                                                                   | 10 (56)              |
| Main <u>feasibility</u> objective given                                                                         |                      |
| <i>Where feasibility is primary objective</i>                                                                   |                      |
| Implementing intervention                                                                                       | 6/10 (60)            |
| Recruitment and retention                                                                                       | 3/10 (30)            |
| Feasibility of cluster design                                                                                   | 1/10 (10)            |
| <i>Where feasibility is not primary objective<sup>2</sup></i>                                                   |                      |
| Implementing intervention                                                                                       | 3/8 (38)             |
| Recruitment                                                                                                     | 2/8 (25)             |
| Cluster design                                                                                                  | 1/8 (13)             |
| Feasibility of trial being able to answer the effectiveness question (and what study design would enable this)  | 1/8 (13)             |
| Feasibility of larger study                                                                                     | 1/8 (13)             |
| Method used to address main <u>feasibility</u> objective given                                                  |                      |
| <i>Where feasibility is primary objective</i>                                                                   |                      |
| Descriptive statistics and/or qualitative                                                                       | 9/10 (90)            |
| Statistical test                                                                                                | 1/10 (10)            |
| <i>Where feasibility is not primary objective</i>                                                               |                      |
| Descriptive statistics/Qualitative                                                                              | 3/8 (38)             |
| None given/reported elsewhere                                                                                   | 5/8 (63)             |
| Rationale for numbers in pilot trial based on formal power calculation for effectiveness/ efficacy <sup>3</sup> | 0/8 (0)              |
| Performing any formal hypothesis testing for effectiveness/ efficacy                                            | 9/18 (50)            |
| Making any statements about effectiveness/ efficacy without a caveat                                            | 4/18 (22)            |

<sup>1</sup> Where the primary objective was not feasibility, the primary objective was effectiveness/ potential effectiveness and was addressed using statistical tests.

<sup>2</sup> One of the inclusion criteria was that studies were assessing feasibility, but it did not have to be the primary objective

<sup>3</sup> Based on 8 trials that reported a rationale for the sample size of the pilot trial



Table 4: Number (%) of reports adhering to pilot CRT quality criteria

|                            | Item                      | Criterion                                                                                                                                                                                                                                                                                                                                                        | n(%)                                                                                              |
|----------------------------|---------------------------|------------------------------------------------------------------------------------------------------------------------------------------------------------------------------------------------------------------------------------------------------------------------------------------------------------------------------------------------------------------|---------------------------------------------------------------------------------------------------|
| Title and Abstract         | 1a                        | Term 'pilot' or 'feasibility' included in the title<br>Identification as a pilot or feasibility randomised trial in the title                                                                                                                                                                                                                                    | 15 (83)<br>12 (67)                                                                                |
|                            | <b>1a</b>                 | <b>Term 'cluster' included in the title</b><br><b>Identification as a cluster randomised trial in the title</b>                                                                                                                                                                                                                                                  | 12 (67)<br>12 (67)                                                                                |
| Introduction               | 2a                        | Scientific background and explanation of rationale for future definitive trial reported                                                                                                                                                                                                                                                                          | 18 (100)                                                                                          |
|                            | [S]                       | Reasons for randomised pilot trial reported                                                                                                                                                                                                                                                                                                                      | 7 (39)                                                                                            |
|                            | <b>2a</b>                 | <b>Rationale given for using cluster design</b>                                                                                                                                                                                                                                                                                                                  | 6 (33)                                                                                            |
| Methods – Trial design     | 3a                        | Description of pilot trial design                                                                                                                                                                                                                                                                                                                                | 18 (100)                                                                                          |
|                            | <b>3a</b>                 | <b>Definition of cluster</b>                                                                                                                                                                                                                                                                                                                                     | 18 (100)                                                                                          |
|                            | 3b                        | Reported any changes to methods after pilot trial commencement<br>If yes, reported reasons                                                                                                                                                                                                                                                                       | 5 (28)<br>5/5 (100)                                                                               |
| Methods – Participants     | 4a                        | Reported eligibility criteria for participants                                                                                                                                                                                                                                                                                                                   | 13 (72)                                                                                           |
|                            | <b>4a</b>                 | <b>Reported eligibility criteria for clusters</b>                                                                                                                                                                                                                                                                                                                | 9 (50)                                                                                            |
|                            | 4b                        | Reported settings and locations where the data were collected                                                                                                                                                                                                                                                                                                    | 18 (100)                                                                                          |
|                            | 4c<br>[N]                 | Reported how participants were identified<br><b>Reported how clusters were identified</b><br>Reported how participants were consented <sup>1</sup><br><b>Reported how clusters were consented</b>                                                                                                                                                                | 9 (50)<br>6 (33)<br>13/17 (76)<br>2 (11)                                                          |
| Methods – Interventions    | 5                         | Described the interventions for each group                                                                                                                                                                                                                                                                                                                       | 13 (72)                                                                                           |
| Methods - Outcomes         | 6b                        | Reported any changes to pilot trial assessments or measurements after pilot trial commencement<br>If yes, reported reasons                                                                                                                                                                                                                                       | 1 (6)<br>1/1(100)                                                                                 |
|                            | 6c<br>[N]                 | Reported criteria used to judge whether, or how, to proceed with the future definitive trial                                                                                                                                                                                                                                                                     | 3 (17)                                                                                            |
| Methods – Sample size      | 7a<br>[S]                 | Reported a rationale for the sample size of the pilot trial                                                                                                                                                                                                                                                                                                      | 8 (44)                                                                                            |
|                            | <b>7a</b>                 | <b>Cluster design considered during the description of the rationale for numbers in the pilot trial</b>                                                                                                                                                                                                                                                          | 3 (17)                                                                                            |
|                            | 7b                        | Reported stopping guidelines                                                                                                                                                                                                                                                                                                                                     | 0 (0)                                                                                             |
| Methods - Randomisation    | 8a                        | Reported method used to generate the random allocation sequence                                                                                                                                                                                                                                                                                                  | 9 (50)                                                                                            |
|                            | 8b                        | Reported randomisation method                                                                                                                                                                                                                                                                                                                                    | 13 (72)                                                                                           |
|                            | 9                         | Reported mechanism used to implement the random allocation sequence<br>Reported allocation concealment                                                                                                                                                                                                                                                           | 4 (22)<br>7 (39)                                                                                  |
|                            | 10/<br><b>10a</b>         | Reported who:<br>Generated the random allocation sequence<br><b>Enrolled clusters</b><br><b>Assigned clusters to interventions</b>                                                                                                                                                                                                                               | 8 (44)<br>3 (17)<br>4 (22)                                                                        |
|                            | <b>10c</b>                | <b>Reported from whom consent was sought</b><br><i>Reported whether consent was sought from participants</i><br><b>Reported whether consent was sought from clusters</b><br><b>Reported whether participant consent was sought before or after randomisation</b> <sup>1</sup>                                                                                    | 2 (11)<br>17 (94)<br>2 (11)<br>8/17 (47)                                                          |
| Methods - Blinding         | 11a                       | Reported on whether there was blinding<br>Reported who was blinded <sup>2</sup><br>Reported how they were blinded <sup>2</sup>                                                                                                                                                                                                                                   | 10 (56)<br>6/14 (43)<br>1/14 (7)                                                                  |
|                            | <b>12a</b>                | <b>Reports clustering accounted for in any of the methods used to address pilot trial objectives/ research questions</b> <sup>3</sup>                                                                                                                                                                                                                            | 13/17 (76)                                                                                        |
| Results – Participant flow | 13*                       | Reports a diagram with flow of individuals through the trial                                                                                                                                                                                                                                                                                                     | 12 (67)                                                                                           |
|                            | <b>13*</b>                | <b>Reports a diagram with flow of clusters through the trial</b>                                                                                                                                                                                                                                                                                                 | 10 (56)                                                                                           |
|                            | 13a/<br><b>13a</b><br>[S] | Reported number of:<br>Individuals ( <b>Clusters</b> ) approached and/or assessed for eligibility <sup>4</sup><br>Individuals ( <b>Clusters</b> ) randomly assigned <sup>4</sup><br>Individuals ( <b>Clusters</b> ) that received intended treatment <sup>4; 4</sup><br>Individuals ( <b>Clusters</b> ) that were assessed for primary objective <sup>4; 4</sup> | 8/17 (47); 10/18 (56)<br>13/17 (76); 17/18 (94)<br>8/17 (47); 5/17 (29)<br>16/17 (94); 14/17 (82) |
|                            | 13b/<br><b>13b</b>        | Reported number of:<br>Losses for individuals ( <b>Clusters</b> ) after randomisation <sup>4; 4</sup><br>Exclusions for individuals ( <b>Clusters</b> ) after randomisation <sup>4; 4</sup>                                                                                                                                                                      | 11/16 (69); 6/17 (35)<br>1/17 (6); 3/17 (18)                                                      |
|                            | 14a                       | Reported on dates defining the periods of recruitment                                                                                                                                                                                                                                                                                                            | 8 (44)                                                                                            |

|                                   |            |                                                                                                             |                               |
|-----------------------------------|------------|-------------------------------------------------------------------------------------------------------------|-------------------------------|
|                                   |            | Reported on dates defining the periods of follow up                                                         | 11 (61)                       |
|                                   | 14b        | Reported the pilot trial ended/stopped                                                                      | 0 (0)                         |
| Results – Baseline data           | 15         | Reported a table showing baseline characteristics for the individual level<br>If yes, by group              | 12 (67)<br>11/12 (92)         |
|                                   | <b>15</b>  | <b>Reported a table showing baseline characteristics for the cluster level<br/>If yes, by group</b>         | 2 (11)<br>2/2 (100)           |
| Results – Outcomes and estimation | 17a        | Reported results for main feasibility objective (quantitative or qualitative) <sup>5</sup>                  | 13/17 (76)                    |
| Results - Harms                   | 19         | Reported on harms or unintended effects                                                                     | 4 (22)                        |
|                                   | 19a<br>[N] | Reported other unintended consequences                                                                      | 0 (0)                         |
| Discussion                        | 20<br>[S]  | Reported limitations of pilot trial<br>Reported sources of potential bias<br>Reported remaining uncertainty | 17 (94)<br>10 (56)<br>10 (56) |
|                                   | 21<br>[S]  | Reported generalisability of pilot trial methods/findings to future definitive trial or other studies       | 16 (89)                       |
|                                   | 22         | Interpretation of feasibility consistent with main feasibility objectives and findings <sup>5</sup>         | 12/17 (71)                    |
|                                   | 22A<br>[N] | Reported implications for progression from the pilot to the future definitive trial                         | 16 (89)                       |
| Other information                 | 23         | Reported registration number for pilot trial<br>Reported name of registry for pilot trial                   | 11 (61)<br>11 (61)            |
|                                   | 24<br>[S]  | Reported where the pilot trial protocol can be accessed                                                     | 7 (39)                        |
|                                   | 25         | Reported source of funding                                                                                  | 18 (100)                      |
|                                   | 26<br>[N]  | Reported ethical approval/research review committee approval<br>If yes, reported reference number           | 17 (94)<br>8/17 (47)          |

Item numbers in normal font refer to the item in the CONSORT extension for pilot trials that the quality assessment item is based on.

**Item numbers in bold italics refer to the item in the CONSORT extension for CRTs that the quality assessment item is based on.**

[N] represents new items in the CONSORT extension for pilot trials compared to the CONSORT 2010 for RCTs.

[S] represents items in the CONSORT extension for pilot trials that are substantially adapted from the CONSORT 2010 for RCTs.

\*The CONSORT statements do not include an item 13 but there is a participant flow subheading which strongly recommends a diagram. We therefore reference this subheading as 'item 13' here.

<sup>1</sup> Item not relevant for 1 trial [A12] because they said that the Ethics Board determined it could be conducted without informed consent from patients or surrogates.

<sup>2</sup> Item not relevant for 4 trials [A7, A10, A12, A18] because they reported that blinding was not used.

<sup>3</sup> Item not relevant for 1 trial because no confidence intervals/p-values were given,[A17] so clustering did not need to be accounted for in any of their methods because effect estimates are not biased by cluster randomisation, only confidence intervals/p-values.

<sup>4</sup> Not relevant for 1 trial due to the design of the study.[A10] (This paper was different from the others such that it was not relevant to extract these items. The clusters were postcode areas and they were assessing two online recruitment interventions and comparing the success of the recruitment interventions. As such, participants were those who completed the online questions, and each arm of the study had a "total population ranging from 1.6 to 2 million people clustered in 4 postcode areas")

<sup>4\*</sup> Not relevant for 2 trials due to the design of these studies.[A10, A12] (See reason above for A10. For A12, data was collected from medical patient charts so these items were not relevant to extract)

<sup>5</sup> One paper reports the feasibility results in a separate paper so is not included.[A3]

**Table 5: Number (%) of quality assessment criteria reported by each pilot CRT in this review**

| Study        | Overall n(%)* | Title & abstract and Introduction n(%) | Methods n(%) | Results n(%) | Discussion and Other information n(%) |
|--------------|---------------|----------------------------------------|--------------|--------------|---------------------------------------|
| Drahota [A7] | 50(70)        | 6(86)                                  | 17(59)       | 18(78)       | 9(75)                                 |
| Pai [A12]    | 48(69)        | 5(71)                                  | 17(61)       | 18(78)       | 8(67)                                 |
| Mytton [A17] | 50(68)        | 4(57)                                  | 21(66)       | 13(57)       | 12(100)                               |
| Thomas [A18] | 46(67)        | 5(71)                                  | 17(59)       | 15(65)       | 9(90)                                 |
| Teut [A14]   | 49(66)        | 6(86)                                  | 20(63)       | 14(61)       | 9(75)                                 |
| Taylor [A6]  | 47(64)        | 7(100)                                 | 16(52)       | 13(57)       | 11(92)                                |
| Légaré [A3]  | 42(58)        | 3(43)                                  | 18(56)       | 14(61)       | 7(64)                                 |
| Begh [A1]    | 41(56)        | 5(71)                                  | 16(52)       | 11(48)       | 9(75)                                 |
| Jago [A15]   | 39(55)        | 4(57)                                  | 11(38)       | 13(57)       | 11(92)                                |
| Jones [A10]  | 32(52)        | 7(100)                                 | 10(33)       | 6(50)        | 9(75)                                 |
| Moore [A11]  | 37(52)        | 5(71)                                  | 13(45)       | 8(35)        | 11(92)                                |
| Michie [A16] | 36(51)        | 3(43)                                  | 15(52)       | 8(36)        | 10(83)                                |
| Jones [A2]   | 37(51)        | 3(43)                                  | 15(48)       | 10(45)       | 9(75)                                 |
| Jago [A5]    | 33(46)        | 4(57)                                  | 13(45)       | 10(43)       | 6(50)                                 |
| Gifford [A9] | 33(45)        | 6(86)                                  | 12(39)       | 8(35)        | 7(58)                                 |
| Reeves [A13] | 29(41)        | 6(86)                                  | 11(38)       | 7(32)        | 5(42)                                 |
| Frenn [A8]   | 18(26)        | 1(14)                                  | 5(17)        | 7(32)        | 5(42)                                 |
| Hopkins [A4] | 16(23)        | 2(29)                                  | 4(14)        | 4(18)        | 6(50)                                 |

\*This is the overall number(percentage) of the quality assessment items in Table 4 that are reported by each study. The other columns look at this within categories. Note that the denominator varies between studies because not all quality assessment items are relevant for all studies (see footnote of Table 4) and not applicable for some items if a related item is not reported (see items 3b, 6b, 15, 26 in Table 4).

## FIGURES

**Figure 1: Flow diagram of the identification process for the sample of 18 pilot cluster randomised trials included in this review**

## APPENDICES

**Appendix 1: Search strategy**

**Appendix 2: Data extracted**

**Appendix 3: List of studies included in this systematic review**

1  
2  
3  
4  
5  
6  
7  
8  
9  
10  
11  
12  
13  
14  
15  
16  
17  
18  
19  
20  
21  
22  
23  
24  
25  
26  
27  
28  
29  
30  
31  
32  
33  
34  
35  
36  
37  
38  
39  
40  
41  
42  
43  
44  
45  
46  
47  
48  
49  
50  
51  
52  
53  
54  
55  
56  
57  
58  
59  
60



Flow diagram of the identification process for the sample of 18 pilot cluster randomised trials included in this review

210x297mm (300 x 300 DPI)

**Appendix 1: Search strategy**

#1: randomised trial [All fields]  
#2: randomized trial [All fields]  
#3: #1 OR #2  
#4: clinical trial [All Fields]  
#5: #3 AND #4  
#6: ((cluster randomization) OR (cluster randomisation) OR (cluster) OR (clustered) OR (clustering) OR (clusters) OR (group-randomized) OR (group-randomised) OR (randomisation unit) OR (randomization unit)) [All fields]  
#7: #5 AND #6  
#8: pilot [Title/Abstract]  
#9: feasibility [Title/Abstract]  
#10: #8 OR #9  
#11: #7 AND #10  
#12: protocol [Title]  
#13: #11 NOT #12  
#14: ("2011/01/01"[Date - Publication] : "2014/12/31"[Date - Publication])  
#15: #13 AND #14

## Appendix 2: Data extracted

| Items                                                                                                           | Data extracted                                                  | Further information                                                                                                                                                                                                                                                                                       |
|-----------------------------------------------------------------------------------------------------------------|-----------------------------------------------------------------|-----------------------------------------------------------------------------------------------------------------------------------------------------------------------------------------------------------------------------------------------------------------------------------------------------------|
| <b>Descriptives</b>                                                                                             |                                                                 |                                                                                                                                                                                                                                                                                                           |
| Name of first author                                                                                            | Text                                                            |                                                                                                                                                                                                                                                                                                           |
| Publication year                                                                                                | Date                                                            | The earlier of the print date and electronic date                                                                                                                                                                                                                                                         |
| Journal                                                                                                         | Text                                                            |                                                                                                                                                                                                                                                                                                           |
| Title                                                                                                           | Text                                                            |                                                                                                                                                                                                                                                                                                           |
| Country (or countries) in which the trial was set                                                               | Text                                                            |                                                                                                                                                                                                                                                                                                           |
| Setting where the data were collected                                                                           | Text                                                            | e.g. community, hospital clinic etc.                                                                                                                                                                                                                                                                      |
| Pilot trial design                                                                                              | Parallel CRT,<br>factorial CRT,<br>cross-over CRT,<br>other CRT |                                                                                                                                                                                                                                                                                                           |
| What was the cluster?                                                                                           | Text                                                            |                                                                                                                                                                                                                                                                                                           |
| Method of cluster randomisation                                                                                 | Text                                                            |                                                                                                                                                                                                                                                                                                           |
| Number of clusters randomised                                                                                   | Number                                                          |                                                                                                                                                                                                                                                                                                           |
| Number of individuals randomised                                                                                | Number                                                          |                                                                                                                                                                                                                                                                                                           |
| <b>Additional items relating to pilot trial methodology</b>                                                     |                                                                 |                                                                                                                                                                                                                                                                                                           |
| Primary objective/ research question of the pilot trial                                                         | Text                                                            | As specified by the author, else the outcome used in the sample size justification, or else the first objective/ research question mentioned in the abstract or else main text (following a similar method as that used by Diaz-Ordaz et al.[8])                                                          |
| Is the primary objective feasibility?                                                                           | Yes/No                                                          |                                                                                                                                                                                                                                                                                                           |
| Primary objective/ research question measure                                                                    | Text                                                            |                                                                                                                                                                                                                                                                                                           |
| Method used to address primary objective/ research question                                                     | Text                                                            | Defined as the main method presented for the primary objective/ research question                                                                                                                                                                                                                         |
| Main feasibility objective/ research question of the pilot trial                                                | Text                                                            | As specified by the author, else the feasibility outcome used in the sample size justification, or else the first feasibility objective/ research question mentioned in the abstract or else main text                                                                                                    |
| Main feasibility objective/ research question measure                                                           | Text                                                            |                                                                                                                                                                                                                                                                                                           |
| Method used to address main feasibility objective/ research question                                            | Text                                                            | Defined as the main method presented for the primary objective/ research question                                                                                                                                                                                                                         |
| Is the rationale for numbers in the pilot trial based on formal power calculation for effectiveness (efficacy)? | Yes/no                                                          |                                                                                                                                                                                                                                                                                                           |
| Is the paper performing any formal hypothesis testing for effectiveness/ efficacy?                              | Yes/no                                                          |                                                                                                                                                                                                                                                                                                           |
| Is the paper making any statements about effectiveness/ efficacy without a caveat                               | Yes/no                                                          | The caveat must explain that it is an indication of <i>potential</i> effectiveness or explain that the study is underpowered                                                                                                                                                                              |
| <b>Title and Abstract</b>                                                                                       |                                                                 |                                                                                                                                                                                                                                                                                                           |
| Term 'pilot' or 'feasibility' included in the title                                                             | Yes/no                                                          |                                                                                                                                                                                                                                                                                                           |
| Identification as a pilot or feasibility randomised trial in the title                                          | Yes/no                                                          | Require 'pilot randomised trial' or 'feasibility randomised trial' in the title, or 'pilot study' or 'feasibility study' and 'randomised trial' in the title                                                                                                                                              |
| Term 'cluster' included in the title                                                                            | Yes/no                                                          |                                                                                                                                                                                                                                                                                                           |
| Identification as a cluster randomised trial in the title                                                       | Yes/no                                                          | Require 'cluster randomised trial' in the title – don't accept 'clustered' as this can imply correlation rather than cluster randomised                                                                                                                                                                   |
| <b>Introduction</b>                                                                                             |                                                                 |                                                                                                                                                                                                                                                                                                           |
| Scientific background and explanation of rationale for future definitive trial reported                         | Yes/no                                                          |                                                                                                                                                                                                                                                                                                           |
| Reasons for randomised pilot trial reported                                                                     | Yes/no                                                          | We specified there needed to be a rationale in the introduction section for the randomised pilot trial, which was not just simply stating the aims/ objectives/outcomes of the pilot trial but gave a clear rationale of why the pilot trial was needed before proceeding to the future definitive trial. |

|    |                                                                                                  |        |                                                                                                                                                                                                                                                                                                      |
|----|--------------------------------------------------------------------------------------------------|--------|------------------------------------------------------------------------------------------------------------------------------------------------------------------------------------------------------------------------------------------------------------------------------------------------------|
| 1  | Rationale given for using cluster design                                                         | Yes/no |                                                                                                                                                                                                                                                                                                      |
| 2  | <b>Methods – Trial design</b>                                                                    |        |                                                                                                                                                                                                                                                                                                      |
| 3  | Description of pilot trial design                                                                | Yes/no |                                                                                                                                                                                                                                                                                                      |
| 4  | Definition of cluster                                                                            | Yes/no |                                                                                                                                                                                                                                                                                                      |
| 5  | Reported any changes to methods after pilot trial commencement                                   | Yes/no |                                                                                                                                                                                                                                                                                                      |
| 6  | If yes, reported reasons                                                                         | Yes/no |                                                                                                                                                                                                                                                                                                      |
| 7  | <b>Methods – Participants</b>                                                                    |        |                                                                                                                                                                                                                                                                                                      |
| 8  | Reported eligibility criteria for participants                                                   | Yes/no |                                                                                                                                                                                                                                                                                                      |
| 9  | Reported eligibility criteria for clusters                                                       | Yes/no |                                                                                                                                                                                                                                                                                                      |
| 10 | Reported settings and locations where the data were collected                                    | Yes/no |                                                                                                                                                                                                                                                                                                      |
| 11 | Reported how participants were identified                                                        | Yes/no | We required that the authors describe the exact way the participants were identified (e.g. during consultations/visits to the cluster, or through advertisement requesting volunteers)                                                                                                               |
| 12 | Reported how clusters were identified                                                            | Yes/no | We required that the authors describe the exact way the clusters were identified (e.g. all clusters in a particular geographical location, or selection from a register/list etc.)                                                                                                                   |
| 13 | Reported how participants were consented                                                         | Yes/no |                                                                                                                                                                                                                                                                                                      |
| 14 | Reported how clusters were consented                                                             | Yes/no |                                                                                                                                                                                                                                                                                                      |
| 15 | <b>Methods – Interventions</b>                                                                   |        |                                                                                                                                                                                                                                                                                                      |
| 16 | Described the interventions for each group                                                       | Yes/no |                                                                                                                                                                                                                                                                                                      |
| 17 | <b>Methods – Outcomes</b>                                                                        |        |                                                                                                                                                                                                                                                                                                      |
| 18 | Reported any changes to pilot trial assessments or measurements after pilot trial commencement   | Yes/no |                                                                                                                                                                                                                                                                                                      |
| 19 | If yes, reported reasons                                                                         | Yes/no |                                                                                                                                                                                                                                                                                                      |
| 20 | Reported criteria used to judge whether, or how, to proceed with the future definitive trial     | Yes/no |                                                                                                                                                                                                                                                                                                      |
| 21 | <b>Methods – Sample size</b>                                                                     |        |                                                                                                                                                                                                                                                                                                      |
| 22 | Reported a rationale for the sample size of the pilot trial                                      | Yes/no |                                                                                                                                                                                                                                                                                                      |
| 23 | Cluster design considered during the description of the rationale for numbers in the pilot trial | Yes/no | We required that the authors show some consideration about clustering during the description of their sample size calculation, even if not formally accounting for it currently but describe during their rationale that they e.g. plan to estimate the design effect in the future definitive trial |
| 24 | Reported stopping guidelines                                                                     | Yes/no |                                                                                                                                                                                                                                                                                                      |
| 25 | <b>Methods – Randomisation</b>                                                                   |        |                                                                                                                                                                                                                                                                                                      |
| 26 | Reported method used to generate the random allocation sequence                                  | Yes/no | e.g. random numbers table, coin tossing, computer generated random list                                                                                                                                                                                                                              |
| 27 | Reported randomisation method                                                                    | Yes/no |                                                                                                                                                                                                                                                                                                      |
| 28 | If yes, randomisation method                                                                     | Text   | e.g. simple, stratification, blocking, matching                                                                                                                                                                                                                                                      |
| 29 | Reported mechanism used to implement the random allocation sequence                              | Yes/no | e.g. sequentially numbered containers, sealed envelopes, central telephone                                                                                                                                                                                                                           |
| 30 | Reported allocation concealment                                                                  | Yes/no |                                                                                                                                                                                                                                                                                                      |
| 31 | Reported who:                                                                                    |        |                                                                                                                                                                                                                                                                                                      |
| 32 | Generated the random allocation sequence                                                         | Yes/no |                                                                                                                                                                                                                                                                                                      |
| 33 | Enrolled clusters                                                                                | Yes/no |                                                                                                                                                                                                                                                                                                      |
| 34 | Assigned clusters to interventions                                                               | Yes/no | Tick yes for last two points if a 'who' is not relevant since done by e.g. post/online                                                                                                                                                                                                               |
| 35 | Reported whether consent was sought from participants                                            | Yes/no |                                                                                                                                                                                                                                                                                                      |
| 36 | Reported whether consent was sought from clusters                                                | Yes/no |                                                                                                                                                                                                                                                                                                      |
| 37 | Reported from whom consent was sought                                                            | Yes/no | i.e. reported both whether consent was sought from participants and whether consent was sought from clusters                                                                                                                                                                                         |
| 38 | Reported whether participant consent was sought before or after randomisation                    | Yes/no |                                                                                                                                                                                                                                                                                                      |
| 39 | <b>Methods – Blinding</b>                                                                        |        |                                                                                                                                                                                                                                                                                                      |
| 40 | Reported on whether there was blinding                                                           | Yes/no |                                                                                                                                                                                                                                                                                                      |

|                                                                                                                      |                                                                                                                                                                                                                                                                                                                        |                                                          |                                                                                                                                                                                                                                                                                                                                                                                                                                                                                                                     |
|----------------------------------------------------------------------------------------------------------------------|------------------------------------------------------------------------------------------------------------------------------------------------------------------------------------------------------------------------------------------------------------------------------------------------------------------------|----------------------------------------------------------|---------------------------------------------------------------------------------------------------------------------------------------------------------------------------------------------------------------------------------------------------------------------------------------------------------------------------------------------------------------------------------------------------------------------------------------------------------------------------------------------------------------------|
| 1<br>2<br>3<br>4<br>5<br>6<br>7<br>8                                                                                 | Reported who was blinded                                                                                                                                                                                                                                                                                               | Yes/no                                                   | tick yes if they report anyone who was blinded, even if they don't report on everyone                                                                                                                                                                                                                                                                                                                                                                                                                               |
| 9<br>10<br>11<br>12<br>13<br>14<br>15<br>16<br>17<br>18<br>19<br>20<br>21<br>22<br>23<br>24<br>25<br>26<br>27        | Reported how they were blinded                                                                                                                                                                                                                                                                                         | Yes/no                                                   | tick yes if they report on how anyone was blinded, even if they don't report on how everyone who was blinded was blinded                                                                                                                                                                                                                                                                                                                                                                                            |
| 28<br>29<br>30<br>31<br>32<br>33<br>34<br>35<br>36<br>37<br>38<br>39<br>40<br>41<br>42<br>43<br>44<br>45<br>46<br>47 | <b>Methods – Analytical methods</b>                                                                                                                                                                                                                                                                                    |                                                          |                                                                                                                                                                                                                                                                                                                                                                                                                                                                                                                     |
| 48<br>49<br>50<br>51<br>52<br>53<br>54<br>55<br>56<br>57<br>58<br>59<br>60                                           | Reports clustering accounted for in any of the methods used to address pilot trial objectives/ research questions                                                                                                                                                                                                      | Yes/no                                                   |                                                                                                                                                                                                                                                                                                                                                                                                                                                                                                                     |
|                                                                                                                      | <b>Results – Participant flow</b>                                                                                                                                                                                                                                                                                      |                                                          |                                                                                                                                                                                                                                                                                                                                                                                                                                                                                                                     |
|                                                                                                                      | Reports a diagram with flow of individuals through the trial                                                                                                                                                                                                                                                           | Yes/no                                                   |                                                                                                                                                                                                                                                                                                                                                                                                                                                                                                                     |
|                                                                                                                      | Reports a diagram with flow of clusters through the trial                                                                                                                                                                                                                                                              | Yes/no                                                   |                                                                                                                                                                                                                                                                                                                                                                                                                                                                                                                     |
|                                                                                                                      | Reported number of:<br>Individuals approached and/or assessed for eligibility<br>Individuals randomly assigned<br>Individuals that received intended treatment<br>Losses for individuals after randomisation<br>Exclusions for individuals after randomisation<br>Individuals that were assessed for primary objective | Yes/no<br>Yes/no<br>Yes/no<br>Yes/no<br>Yes/no<br>Yes/no |                                                                                                                                                                                                                                                                                                                                                                                                                                                                                                                     |
|                                                                                                                      | Reported number of:<br>Clusters approached and/or assessed for eligibility<br>Clusters randomly assigned<br>Clusters that received intended treatment<br>Losses for clusters after randomisation<br>Exclusions for clusters after randomisation<br>Clusters that were assessed for primary objective                   | Yes/no<br>Yes/no<br>Yes/no<br>Yes/no<br>Yes/no<br>Yes/no |                                                                                                                                                                                                                                                                                                                                                                                                                                                                                                                     |
|                                                                                                                      | <b>Results – Recruitment</b>                                                                                                                                                                                                                                                                                           |                                                          |                                                                                                                                                                                                                                                                                                                                                                                                                                                                                                                     |
|                                                                                                                      | Reported on dates defining the periods of recruitment                                                                                                                                                                                                                                                                  | Yes/no                                                   |                                                                                                                                                                                                                                                                                                                                                                                                                                                                                                                     |
|                                                                                                                      | Reported on dates defining the periods of follow up                                                                                                                                                                                                                                                                    | Yes/no                                                   |                                                                                                                                                                                                                                                                                                                                                                                                                                                                                                                     |
|                                                                                                                      | Reported the pilot trial ended/stopped                                                                                                                                                                                                                                                                                 | Yes/no                                                   |                                                                                                                                                                                                                                                                                                                                                                                                                                                                                                                     |
|                                                                                                                      | <b>Results – Baseline data</b>                                                                                                                                                                                                                                                                                         |                                                          |                                                                                                                                                                                                                                                                                                                                                                                                                                                                                                                     |
|                                                                                                                      | Reported a table showing baseline characteristics for the individual level<br>If yes, by group                                                                                                                                                                                                                         | Yes/no<br>Yes/no                                         |                                                                                                                                                                                                                                                                                                                                                                                                                                                                                                                     |
|                                                                                                                      | Reported a table showing baseline characteristics for the cluster level<br>If yes, by group                                                                                                                                                                                                                            | Yes/no<br>Yes/no                                         |                                                                                                                                                                                                                                                                                                                                                                                                                                                                                                                     |
|                                                                                                                      | <b>Results – Outcomes and estimation</b>                                                                                                                                                                                                                                                                               |                                                          |                                                                                                                                                                                                                                                                                                                                                                                                                                                                                                                     |
|                                                                                                                      | Reported results for main feasibility objective (quantitative or qualitative)                                                                                                                                                                                                                                          | Yes/no                                                   |                                                                                                                                                                                                                                                                                                                                                                                                                                                                                                                     |
|                                                                                                                      | <b>Results – Harms</b>                                                                                                                                                                                                                                                                                                 |                                                          |                                                                                                                                                                                                                                                                                                                                                                                                                                                                                                                     |
|                                                                                                                      | Reported on harms or unintended effects                                                                                                                                                                                                                                                                                | Yes/no                                                   | Tick yes even if reported that there were no harms                                                                                                                                                                                                                                                                                                                                                                                                                                                                  |
|                                                                                                                      | Reported other unintended consequences                                                                                                                                                                                                                                                                                 | Yes/no                                                   | An unintended consequence would be an unexpected result/finding that was not one of the objectives to explore and where the result would have consequences on the future definitive trial, such as a change in design/population etc.                                                                                                                                                                                                                                                                               |
|                                                                                                                      | <b>Discussion</b>                                                                                                                                                                                                                                                                                                      |                                                          |                                                                                                                                                                                                                                                                                                                                                                                                                                                                                                                     |
|                                                                                                                      | Reported limitations of pilot trial                                                                                                                                                                                                                                                                                    | Yes/no                                                   |                                                                                                                                                                                                                                                                                                                                                                                                                                                                                                                     |
|                                                                                                                      | Reported sources of potential bias                                                                                                                                                                                                                                                                                     | Yes/no                                                   |                                                                                                                                                                                                                                                                                                                                                                                                                                                                                                                     |
|                                                                                                                      | Reported remaining uncertainty                                                                                                                                                                                                                                                                                         | Yes/no                                                   |                                                                                                                                                                                                                                                                                                                                                                                                                                                                                                                     |
|                                                                                                                      | Reported generalisability of pilot trial methods/findings to future definitive trial or other studies                                                                                                                                                                                                                  | Yes/no                                                   | To be reporting on the generalisability of the pilot trial methods/findings to the future definitive trial, we deemed it sufficient for the paper to be discussing whether the methods/findings of the pilot study can be applied to the future definitive trial. To be reporting on the generalisability of the pilot trial methods/findings to other future trials, we deemed it sufficient for the paper to be discussing whether the methods/findings of the pilot study can be applied to other future trials. |
|                                                                                                                      | Interpretation of feasibility consistent with main feasibility objectives and findings                                                                                                                                                                                                                                 | Yes/no                                                   |                                                                                                                                                                                                                                                                                                                                                                                                                                                                                                                     |



|                                                             |                                                                                                                            |                                                                                                                             |  |
|-------------------------------------------------------------|----------------------------------------------------------------------------------------------------------------------------|-----------------------------------------------------------------------------------------------------------------------------|--|
| 1<br>2<br>3<br>4<br>5<br>6<br>7<br>8<br>9<br>10<br>11<br>12 | Reported implications for progression from the pilot to the future definitive trial<br>If yes, what were the implications? | Yes/no<br><br>Proceed/<br>proceed with<br>changes/<br>Further<br>research or<br>piloting needed<br>first/ Don't go<br>ahead |  |
| 13                                                          | Other information                                                                                                          |                                                                                                                             |  |
| 14                                                          | Reported registration number for pilot trial                                                                               | Yes/no                                                                                                                      |  |
| 15                                                          | Reported name of registry for pilot trial                                                                                  | Yes/no                                                                                                                      |  |
| 16                                                          | Reported where the pilot trial protocol can be accessed                                                                    | Yes/no                                                                                                                      |  |
| 17                                                          | Reported source of funding                                                                                                 | Yes/no                                                                                                                      |  |
| 18<br>19                                                    | Reported ethical approval/research review committee approval<br>If yes, reported reference number                          | Yes/no<br>Yes/no                                                                                                            |  |

**Appendix 3: List of studies included in this systematic review**

(Note that the publication years given in the list below are the print publication years, rather than the earlier of the print or electronic publication year, so there is some discrepancy between the list below and Table 1)

1. Begh RA, Aveyard P, Upton P, Bhopal RS, White M, Amos A, et al. Promoting smoking cessation in Pakistani and Bangladeshi men in the UK: pilot cluster randomised controlled trial of trained community outreach workers. *Trials*. 2011;12:197.
2. Jones RA, Riethmuller A, Hesketh K, Trezise J, Batterham M, Okely AD. Promoting fundamental movement skill development and physical activity in early childhood settings: a cluster randomized controlled trial. *Pediatr Exerc Sci*. 2011;23(4):600-15.
3. Legare F, Labrecque M, LeBlanc A, Njoya M, Laurier C, Cote L, et al. Training family physicians in shared decision making for the use of antibiotics for acute respiratory infections: a pilot clustered randomized controlled trial. *Health Expect*. 2011;14 Suppl 1:96-110.
4. Hopkins JM, Glenn BA, Cole BL, McCarthy W, Yancey A. Implementing organizational physical activity and healthy eating strategies on paid time: process evaluation of the UCLA WORKING pilot study. *Health Educ Res*. 2012;27(3):385-98.
5. Jago R, Sebire SJ, Cooper AR, Haase AM, Powell J, Davis L, et al. Bristol girls dance project feasibility trial: outcome and process evaluation results. *Int J Behav Nutr Phys Act*. 2012;9:83.
6. Taylor WJ, Brown M, William L, McPherson KM, Reed K, Dean SG, et al. A pilot cluster randomized controlled trial of structured goal-setting following stroke. *Clin Rehabil*. 2012;26(4):327-38.
7. Drahota AK, Ward D, Udell JE, Soilemezi D, Ogollah R, Higgins B, et al. Pilot cluster randomised controlled trial of flooring to reduce injuries from falls in wards for older people. *Age Ageing*. 2013;42(5):633-40.
8. Frenn M, Pruszynski JE, Felzer H, Zhang J. Authoritative feeding behaviors to reduce child BMI through online interventions. *J Spec Pediatr Nurs*. 2013;18(1):65-77.
9. Gifford WA, Davies BL, Graham ID, Tourangeau A, Woodend AK, Lefebvre N. Developing leadership capacity for guideline use: a pilot cluster randomized control trial. *Worldviews Evid Based Nurs*. 2013;10(1):51-65.
10. Jones RB, Goldsmith L, Hewson P, Williams CJ. Recruitment to online therapies for depression: pilot cluster randomized controlled trial. *J Med Internet Res*. 2013;15(3):e45.
11. Moore GF, Williams A, Moore L, Murphy S. An exploratory cluster randomised trial of a university halls of residence based social norms marketing campaign to reduce alcohol consumption among 1st year students. *Subst Abuse Treat Prev Policy*. 2013;8:15.
12. Pai M, Lloyd NS, Cheng J, Thabane L, Spencer FA, Cook DJ, et al. Strategies to enhance venous thromboprophylaxis in hospitalized medical patients (SENTRY): a pilot cluster randomized trial. *Implement Sci*. 2013;8:1.
13. Reeves R, West E, Barron D. Facilitated patient experience feedback can improve nursing care: a pilot study for a phase III cluster randomised controlled trial. *BMC Health Serv Res*. 2013;13:259.
14. Teut M, Schnabel K, Baur R, Kerckhoff A, Reese F, Pilgram N, et al. Effects and feasibility of an Integrative Medicine program for geriatric patients-a cluster-randomized pilot study. *Clin Interv Aging*. 2013;8:953-61.
15. Jago R, Sebire SJ, Davies B, Wood L, Edwards MJ, Banfield K, et al. Randomised feasibility trial of a teaching assistant led extracurricular physical activity intervention for 9 to 11 year olds: Action 3:30. *Int J Behav Nutr Phys Act*. 2014;11:114.
16. Michie L, Cameron ST, Glasier A, Larke N, Muir A, Lorimer A. Pharmacy-based interventions for initiating effective contraception following the use of emergency contraception: a pilot study. *Contraception*. 2014;90(4):447-53.

- 1
- 2
- 3
- 4 17. Mytton J, Ingram J, Manns S, Stevens T, Mulvaney C, Blair P, et al. The feasibility of using a
- 5 parenting programme for the prevention of unintentional home injuries in the under-fives: a
- 6 cluster randomised controlled trial. *Health Technol Assess*. 2014;18(3):1-184.
- 7 18. Thomas LH, Watkins CL, Sutton CJ, Forshaw D, Leathley MJ, French B, et al. Identifying
- 8 continence options after stroke (ICONS): a cluster randomised controlled feasibility trial.
- 9 *Trials*. 2014;15:509.
- 10
- 11
- 12
- 13
- 14
- 15
- 16
- 17
- 18
- 19
- 20
- 21
- 22
- 23
- 24
- 25
- 26
- 27
- 28
- 29
- 30
- 31
- 32
- 33
- 34
- 35
- 36
- 37
- 38
- 39
- 40
- 41
- 42
- 43
- 44
- 45
- 46
- 47
- 48
- 49
- 50
- 51
- 52
- 53
- 54
- 55
- 56
- 57
- 58
- 59
- 60

For peer review only



# PRISMA 2009 Checklist

1  
2  
3  
4  
5  
6  
7  
8  
9  
10  
11  
12  
13  
14  
15  
16  
17  
18  
19  
20  
21  
22  
23  
24  
25  
26  
27  
28  
29  
30  
31  
32  
33  
34  
35  
36  
37  
38  
39  
40  
41  
42  
43  
44  
45  
46  
47  
48  
49

| Section/topic                      | #  | Checklist item                                                                                                                                                                                                                                                                                              | Reported on page #                |
|------------------------------------|----|-------------------------------------------------------------------------------------------------------------------------------------------------------------------------------------------------------------------------------------------------------------------------------------------------------------|-----------------------------------|
| <b>TITLE</b>                       |    |                                                                                                                                                                                                                                                                                                             |                                   |
| Title                              | 1  | Identify the report as a systematic review, meta-analysis, or both.                                                                                                                                                                                                                                         | 1                                 |
| <b>ABSTRACT</b>                    |    |                                                                                                                                                                                                                                                                                                             |                                   |
| Structured summary                 | 2  | Provide a structured summary including, as applicable: background; objectives; data sources; study eligibility criteria, participants, and interventions; study appraisal and synthesis methods; results; limitations; conclusions and implications of key findings; systematic review registration number. | 1, 2                              |
| <b>INTRODUCTION</b>                |    |                                                                                                                                                                                                                                                                                                             |                                   |
| Rationale                          | 3  | Describe the rationale for the review in the context of what is already known.                                                                                                                                                                                                                              | 3                                 |
| Objectives                         | 4  | Provide an explicit statement of questions being addressed with reference to participants, interventions, comparisons, outcomes, and study design (PICOS).                                                                                                                                                  | 3                                 |
| <b>METHODS</b>                     |    |                                                                                                                                                                                                                                                                                                             |                                   |
| Protocol and registration          | 5  | Indicate if a review protocol exists, if and where it can be accessed (e.g., Web address), and, if available, provide registration information including registration number.                                                                                                                               | 5                                 |
| Eligibility criteria               | 6  | Specify study characteristics (e.g., PICOS, length of follow-up) and report characteristics (e.g., years considered, language, publication status) used as criteria for eligibility, giving rationale.                                                                                                      | 3, 4                              |
| Information sources                | 7  | Describe all information sources (e.g., databases with dates of coverage, contact with study authors to identify additional studies) in the search and date last searched.                                                                                                                                  | 4                                 |
| Search                             | 8  | Present full electronic search strategy for at least one database, including any limits used, such that it could be repeated.                                                                                                                                                                               | Appendix 1                        |
| Study selection                    | 9  | State the process for selecting studies (i.e., screening, eligibility, included in systematic review, and, if applicable, included in the meta-analysis).                                                                                                                                                   | 4                                 |
| Data collection process            | 10 | Describe method of data extraction from reports (e.g., piloted forms, independently, in duplicate) and any processes for obtaining and confirming data from investigators.                                                                                                                                  | 5, 6                              |
| Data items                         | 11 | List and define all variables for which data were sought (e.g., PICOS, funding sources) and any assumptions and simplifications made.                                                                                                                                                                       | Appendix 2                        |
| Risk of bias in individual studies | 12 | Describe methods used for assessing risk of bias of individual studies (including specification of whether this was done at the study or outcome level), and how this information is to be used in any data synthesis.                                                                                      | N/A – review of reporting quality |
| Summary measures                   | 13 | State the principal summary measures (e.g., risk ratio, difference in means).                                                                                                                                                                                                                               | N/A –                             |



## PRISMA 2009 Checklist

1  
2  
3  
4  
5  
6  
7  
8  
9  
10  
11  
12  
13  
14  
15  
16  
17  
18  
19  
20  
21  
22  
23  
24  
25  
26  
27  
28  
29  
30  
31  
32  
33  
34  
35  
36  
37  
38  
39  
40  
41  
42  
43  
44  
45  
46  
47  
48  
49

|                      |    |                                                                                                                                                           |                                   |
|----------------------|----|-----------------------------------------------------------------------------------------------------------------------------------------------------------|-----------------------------------|
|                      |    |                                                                                                                                                           | review of reporting quality       |
| Synthesis of results | 14 | Describe the methods of handling data and combining results of studies, if done, including measures of consistency (e.g., $I^2$ ) for each meta-analysis. | N/A – review of reporting quality |

Page 1 of 2

| Section/topic                 | #  | Checklist item                                                                                                                                                                                           | Reported on page #                |
|-------------------------------|----|----------------------------------------------------------------------------------------------------------------------------------------------------------------------------------------------------------|-----------------------------------|
| Risk of bias across studies   | 15 | Specify any assessment of risk of bias that may affect the cumulative evidence (e.g., publication bias, selective reporting within studies).                                                             | N/A – review of reporting quality |
| Additional analyses           | 16 | Describe methods of additional analyses (e.g., sensitivity or subgroup analyses, meta-regression), if done, indicating which were pre-specified.                                                         | N/A – review of reporting quality |
| <b>RESULTS</b>                |    |                                                                                                                                                                                                          |                                   |
| Study selection               | 17 | Give numbers of studies screened, assessed for eligibility, and included in the review, with reasons for exclusions at each stage, ideally with a flow diagram.                                          | 6, 7, Figure 1                    |
| Study characteristics         | 18 | For each study, present characteristics for which data were extracted (e.g., study size, PICOS, follow-up period) and provide the citations.                                                             | 7, Table 1, Appendix 3            |
| Risk of bias within studies   | 19 | Present data on risk of bias of each study and, if available, any outcome level assessment (see item 12).                                                                                                | N/A – review of reporting quality |
| Results of individual studies | 20 | For all outcomes considered (benefits or harms), present, for each study: (a) simple summary data for each intervention group (b) effect estimates and confidence intervals, ideally with a forest plot. | N/A – review of reporting         |



# PRISMA 2009 Checklist

1  
2  
3  
4  
5  
6  
7  
8  
9  
10  
11  
12  
13  
14  
15  
16  
17  
18  
19  
20  
21  
22  
23  
24  
25  
26  
27  
28  
29  
30  
31  
32  
33  
34  
35  
36  
37  
38  
39  
40  
41  
42  
43  
44  
45  
46  
47  
48  
49

|                             |    |                                                                                                                                                                                      |                                   |
|-----------------------------|----|--------------------------------------------------------------------------------------------------------------------------------------------------------------------------------------|-----------------------------------|
|                             |    |                                                                                                                                                                                      | quality                           |
| Synthesis of results        | 21 | Present results of each meta-analysis done, including confidence intervals and measures of consistency.                                                                              | N/A – review of reporting quality |
| Risk of bias across studies | 22 | Present results of any assessment of risk of bias across studies (see Item 15).                                                                                                      | N/A – review of reporting quality |
| Additional analysis         | 23 | Give results of additional analyses, if done (e.g., sensitivity or subgroup analyses, meta-regression [see Item 16]).                                                                | N/A – review of reporting quality |
| <b>DISCUSSION</b>           |    |                                                                                                                                                                                      |                                   |
| Summary of evidence         | 24 | Summarize the main findings including the strength of evidence for each main outcome; consider their relevance to key groups (e.g., healthcare providers, users, and policy makers). | 9, 10, 11                         |
| Limitations                 | 25 | Discuss limitations at study and outcome level (e.g., risk of bias), and at review-level (e.g., incomplete retrieval of identified research, reporting bias).                        | 12                                |
| Conclusions                 | 26 | Provide a general interpretation of the results in the context of other evidence, and implications for future research.                                                              | 11                                |
| <b>FUNDING</b>              |    |                                                                                                                                                                                      |                                   |
| Funding                     | 27 | Describe sources of funding for the systematic review and other support (e.g., supply of data); role of funders for the systematic review.                                           | 13                                |

From: Moher D, Liberati A, Tetzlaff J, Altman DG, The PRISMA Group (2009). Preferred Reporting Items for Systematic Reviews and Meta-Analyses: The PRISMA Statement. PLoS Med 6(6): e1000097. doi:10.1371/journal.pmed1000097

For more information, visit: [www.prisma-statement.org](http://www.prisma-statement.org).
