# Supplementary material for: Quality of reporting of pilot and feasibility cluster randomised trials: a systematic review
Source: PubMed Central journal article supplement — BMJ Open. 2017 Nov 8;7(11):e016970. doi: 10.1136/bmjopen-2017-016970 (PMC5695336; doi:10.1136/bmjopen-2017-016970), 2017-11-08
Supplement: bmjopen-2017-016970supp001.pdf [file bmjopen-2017-016970supp001.pdf]

## Appendix 1: Search strategy

|      |                                                                                                                                                                                                                         |
|------|-------------------------------------------------------------------------------------------------------------------------------------------------------------------------------------------------------------------------|
| #1:  | randomised trial [All fields]                                                                                                                                                                                           |
| #2:  | randomized trial [All fields]                                                                                                                                                                                           |
| #3:  | #1 OR #2                                                                                                                                                                                                                |
| #4:  | clinical trial [All Fields]                                                                                                                                                                                             |
| #5:  | #3 AND #4                                                                                                                                                                                                               |
| #6:  | ((cluster randomization) OR (cluster randomisation) OR (cluster) OR (clustered) OR (clustering) OR (clusters) OR (group-randomized) OR (group-randomised) OR (randomisation unit) OR (randomization unit)) [All fields] |
| #7:  | #5 AND #6                                                                                                                                                                                                               |
| #8:  | pilot [Title/Abstract]                                                                                                                                                                                                  |
| #9:  | feasibility [Title/Abstract]                                                                                                                                                                                            |
| #10: | #8 OR #9                                                                                                                                                                                                                |
| #11: | #7 AND #10                                                                                                                                                                                                              |
| #12: | protocol [Title]                                                                                                                                                                                                        |
| #13: | #11 NOT #12                                                                                                                                                                                                             |
| #14: | ("2011/01/01"[Date - Publication] : "2014/12/31"[Date - Publication])                                                                                                                                                   |
| #15: | #13 AND #14                                                                                                                                                                                                             |
