# Supplementary material for: Quality of reporting of pilot and feasibility cluster randomised trials: a systematic review
Source: PubMed Central journal article supplement — BMJ Open. 2017 Nov 8;7(11):e016970. doi: 10.1136/bmjopen-2017-016970 (PMC5695336; doi:10.1136/bmjopen-2017-016970), 2017-11-08
Supplement: bmjopen-2017-016970supp002.pdf [file bmjopen-2017-016970supp002.pdf]

## Appendix 2: Data extracted

| Items                                                                                                           | Data extracted                                                  | Further information                                                                                                                                                                                                                                                                                       |
|-----------------------------------------------------------------------------------------------------------------|-----------------------------------------------------------------|-----------------------------------------------------------------------------------------------------------------------------------------------------------------------------------------------------------------------------------------------------------------------------------------------------------|
| <b>Descriptives</b>                                                                                             |                                                                 |                                                                                                                                                                                                                                                                                                           |
| Name of first author                                                                                            | Text                                                            |                                                                                                                                                                                                                                                                                                           |
| Publication year                                                                                                | Date                                                            | The earlier of the print date and electronic date                                                                                                                                                                                                                                                         |
| Journal                                                                                                         | Text                                                            |                                                                                                                                                                                                                                                                                                           |
| Title                                                                                                           | Text                                                            |                                                                                                                                                                                                                                                                                                           |
| Country (or countries) in which the trial was set                                                               | Text                                                            |                                                                                                                                                                                                                                                                                                           |
| Setting where the data were collected                                                                           | Text                                                            | e.g. community, hospital clinic etc.                                                                                                                                                                                                                                                                      |
| Pilot trial design                                                                                              | Parallel CRT,<br>factorial CRT,<br>cross-over CRT,<br>other CRT |                                                                                                                                                                                                                                                                                                           |
| What was the cluster?                                                                                           | Text                                                            |                                                                                                                                                                                                                                                                                                           |
| Method of cluster randomisation                                                                                 | Text                                                            |                                                                                                                                                                                                                                                                                                           |
| Number of clusters randomised                                                                                   | Number                                                          |                                                                                                                                                                                                                                                                                                           |
| Number of individuals randomised                                                                                | Number                                                          |                                                                                                                                                                                                                                                                                                           |
| <b>Additional items relating to pilot trial methodology</b>                                                     |                                                                 |                                                                                                                                                                                                                                                                                                           |
| Primary objective/ research question of the pilot trial                                                         | Text                                                            | As specified by the author, else the outcome used in the sample size justification, or else the first objective/ research question mentioned in the abstract or else main text (following a similar method as that used by Diaz-Ordaz et al.[8])                                                          |
| Is the primary objective feasibility?                                                                           | Yes/No                                                          |                                                                                                                                                                                                                                                                                                           |
| Primary objective/ research question measure                                                                    | Text                                                            |                                                                                                                                                                                                                                                                                                           |
| Method used to address primary objective/ research question                                                     | Text                                                            | Defined as the main method presented for the primary objective/ research question                                                                                                                                                                                                                         |
| Main feasibility objective/ research question of the pilot trial                                                | Text                                                            | As specified by the author, else the feasibility outcome used in the sample size justification, or else the first feasibility objective/ research question mentioned in the abstract or else main text                                                                                                    |
| Main feasibility objective/ research question measure                                                           | Text                                                            |                                                                                                                                                                                                                                                                                                           |
| Method used to address main feasibility objective/ research question                                            | Text                                                            | Defined as the main method presented for the primary objective/ research question                                                                                                                                                                                                                         |
| Is the rationale for numbers in the pilot trial based on formal power calculation for effectiveness (efficacy)? | Yes/no                                                          |                                                                                                                                                                                                                                                                                                           |
| Is the paper performing any formal hypothesis testing for effectiveness/ efficacy?                              | Yes/no                                                          |                                                                                                                                                                                                                                                                                                           |
| Is the paper making any statements about effectiveness/ efficacy without a caveat                               | Yes/no                                                          | The caveat must explain that it is an indication of <i>potential</i> effectiveness or explain that the study is underpowered                                                                                                                                                                              |
| <b>Title and Abstract</b>                                                                                       |                                                                 |                                                                                                                                                                                                                                                                                                           |
| Term 'pilot' or 'feasibility' included in the title                                                             | Yes/no                                                          |                                                                                                                                                                                                                                                                                                           |
| Identification as a pilot or feasibility randomised trial in the title                                          | Yes/no                                                          | Require 'pilot randomised trial' or 'feasibility randomised trial' in the title, or 'pilot study' or 'feasibility study' and 'randomised trial' in the title                                                                                                                                              |
| Term 'cluster' included in the title                                                                            | Yes/no                                                          |                                                                                                                                                                                                                                                                                                           |
| Identification as a cluster randomised trial in the title                                                       | Yes/no                                                          | Require 'cluster randomised trial' in the title – don't accept 'clustered' as this can imply correlation rather than cluster randomised                                                                                                                                                                   |
| <b>Introduction</b>                                                                                             |                                                                 |                                                                                                                                                                                                                                                                                                           |
| Scientific background and explanation of rationale for future definitive trial reported                         | Yes/no                                                          |                                                                                                                                                                                                                                                                                                           |
| Reasons for randomised pilot trial reported                                                                     | Yes/no                                                          | We specified there needed to be a rationale in the introduction section for the randomised pilot trial, which was not just simply stating the aims/ objectives/outcomes of the pilot trial but gave a clear rationale of why the pilot trial was needed before proceeding to the future definitive trial. |

|                                                                                                                      |                            |                                                                                                                                                                                                                                                                                                      |
|----------------------------------------------------------------------------------------------------------------------|----------------------------|------------------------------------------------------------------------------------------------------------------------------------------------------------------------------------------------------------------------------------------------------------------------------------------------------|
| Rationale given for using cluster design                                                                             | Yes/no                     |                                                                                                                                                                                                                                                                                                      |
| <b>Methods – Trial design</b>                                                                                        |                            |                                                                                                                                                                                                                                                                                                      |
| Description of pilot trial design                                                                                    | Yes/no                     |                                                                                                                                                                                                                                                                                                      |
| Definition of cluster                                                                                                | Yes/no                     |                                                                                                                                                                                                                                                                                                      |
| Reported any changes to methods after pilot trial commencement                                                       | Yes/no                     |                                                                                                                                                                                                                                                                                                      |
| If yes, reported reasons                                                                                             | Yes/no                     |                                                                                                                                                                                                                                                                                                      |
| <b>Methods – Participants</b>                                                                                        |                            |                                                                                                                                                                                                                                                                                                      |
| Reported eligibility criteria for participants                                                                       | Yes/no                     |                                                                                                                                                                                                                                                                                                      |
| Reported eligibility criteria for clusters                                                                           | Yes/no                     |                                                                                                                                                                                                                                                                                                      |
| Reported settings and locations where the data were collected                                                        | Yes/no                     |                                                                                                                                                                                                                                                                                                      |
| Reported how participants were identified                                                                            | Yes/no                     | We required that the authors describe the exact way the participants were identified (e.g. during consultations/visits to the cluster, or through advertisement requesting volunteers)                                                                                                               |
| Reported how clusters were identified                                                                                | Yes/no                     | We required that the authors describe the exact way the clusters were identified (e.g. all clusters in a particular geographical location, or selection from a register/list etc.)                                                                                                                   |
| Reported how participants were consented                                                                             | Yes/no                     |                                                                                                                                                                                                                                                                                                      |
| Reported how clusters were consented                                                                                 | Yes/no                     |                                                                                                                                                                                                                                                                                                      |
| <b>Methods – Interventions</b>                                                                                       |                            |                                                                                                                                                                                                                                                                                                      |
| Described the interventions for each group                                                                           | Yes/no                     |                                                                                                                                                                                                                                                                                                      |
| <b>Methods – Outcomes</b>                                                                                            |                            |                                                                                                                                                                                                                                                                                                      |
| Reported any changes to pilot trial assessments or measurements after pilot trial commencement                       | Yes/no                     |                                                                                                                                                                                                                                                                                                      |
| If yes, reported reasons                                                                                             | Yes/no                     |                                                                                                                                                                                                                                                                                                      |
| Reported criteria used to judge whether, or how, to proceed with the future definitive trial                         | Yes/no                     |                                                                                                                                                                                                                                                                                                      |
| <b>Methods – Sample size</b>                                                                                         |                            |                                                                                                                                                                                                                                                                                                      |
| Reported a rationale for the sample size of the pilot trial                                                          | Yes/no                     |                                                                                                                                                                                                                                                                                                      |
| Cluster design considered during the description of the rationale for numbers in the pilot trial                     | Yes/no                     | We required that the authors show some consideration about clustering during the description of their sample size calculation, even if not formally accounting for it currently but describe during their rationale that they e.g. plan to estimate the design effect in the future definitive trial |
| Reported stopping guidelines                                                                                         | Yes/no                     |                                                                                                                                                                                                                                                                                                      |
| <b>Methods – Randomisation</b>                                                                                       |                            |                                                                                                                                                                                                                                                                                                      |
| Reported method used to generate the random allocation sequence                                                      | Yes/no                     | e.g. random numbers table, coin tossing, computer generated random list                                                                                                                                                                                                                              |
| Reported randomisation method<br>If yes, randomisation method                                                        | Yes/no<br>Text             | e.g. simple, stratification, blocking, matching                                                                                                                                                                                                                                                      |
| Reported mechanism used to implement the random allocation sequence                                                  | Yes/no                     | e.g. sequentially numbered containers, sealed envelopes, central telephone                                                                                                                                                                                                                           |
| Reported allocation concealment                                                                                      | Yes/no                     |                                                                                                                                                                                                                                                                                                      |
| Reported who:<br>Generated the random allocation sequence<br>Enrolled clusters<br>Assigned clusters to interventions | Yes/no<br>Yes/no<br>Yes/no | Tick yes for last two points if a 'who' is not relevant since done by e.g. post/online                                                                                                                                                                                                               |
| Reported whether consent was sought from participants                                                                | Yes/no                     |                                                                                                                                                                                                                                                                                                      |
| Reported whether consent was sought from clusters                                                                    | Yes/no                     |                                                                                                                                                                                                                                                                                                      |
| Reported from whom consent was sought                                                                                | Yes/no                     | I.e. reported both whether consent was sought from participants and whether consent was sought from clusters                                                                                                                                                                                         |
| Reported whether participant consent was sought before or after randomisation                                        | Yes/no                     |                                                                                                                                                                                                                                                                                                      |
| <b>Methods – Blinding</b>                                                                                            |                            |                                                                                                                                                                                                                                                                                                      |
| Reported on whether there was blinding                                                                               | Yes/no                     |                                                                                                                                                                                                                                                                                                      |

|                                                                                                                                                                                                                                                                                                                        |                                                          |                                                                                                                                                                                                                                                                                                                                                                                                                                                                                                                     |
|------------------------------------------------------------------------------------------------------------------------------------------------------------------------------------------------------------------------------------------------------------------------------------------------------------------------|----------------------------------------------------------|---------------------------------------------------------------------------------------------------------------------------------------------------------------------------------------------------------------------------------------------------------------------------------------------------------------------------------------------------------------------------------------------------------------------------------------------------------------------------------------------------------------------|
| Reported who was blinded                                                                                                                                                                                                                                                                                               | Yes/no                                                   | tick yes if they report anyone who was blinded, even if they don't report on everyone                                                                                                                                                                                                                                                                                                                                                                                                                               |
| Reported how they were blinded                                                                                                                                                                                                                                                                                         | Yes/no                                                   | tick yes if they report on how anyone was blinded, even if they don't report on how everyone who was blinded was blinded                                                                                                                                                                                                                                                                                                                                                                                            |
| <b>Methods – Analytical methods</b>                                                                                                                                                                                                                                                                                    |                                                          |                                                                                                                                                                                                                                                                                                                                                                                                                                                                                                                     |
| Reports clustering accounted for in any of the methods used to address pilot trial objectives/ research questions                                                                                                                                                                                                      | Yes/no                                                   |                                                                                                                                                                                                                                                                                                                                                                                                                                                                                                                     |
| <b>Results – Participant flow</b>                                                                                                                                                                                                                                                                                      |                                                          |                                                                                                                                                                                                                                                                                                                                                                                                                                                                                                                     |
| Reports a diagram with flow of individuals through the trial                                                                                                                                                                                                                                                           | Yes/no                                                   |                                                                                                                                                                                                                                                                                                                                                                                                                                                                                                                     |
| Reports a diagram with flow of clusters through the trial                                                                                                                                                                                                                                                              | Yes/no                                                   |                                                                                                                                                                                                                                                                                                                                                                                                                                                                                                                     |
| Reported number of:<br>Individuals approached and/or assessed for eligibility<br>Individuals randomly assigned<br>Individuals that received intended treatment<br>Losses for individuals after randomisation<br>Exclusions for individuals after randomisation<br>Individuals that were assessed for primary objective | Yes/no<br>Yes/no<br>Yes/no<br>Yes/no<br>Yes/no<br>Yes/no |                                                                                                                                                                                                                                                                                                                                                                                                                                                                                                                     |
| Reported number of:<br>Clusters approached and/or assessed for eligibility<br>Clusters randomly assigned<br>Clusters that received intended treatment<br>Losses for clusters after randomisation<br>Exclusions for clusters after randomisation<br>Clusters that were assessed for primary objective                   | Yes/no<br>Yes/no<br>Yes/no<br>Yes/no<br>Yes/no<br>Yes/no |                                                                                                                                                                                                                                                                                                                                                                                                                                                                                                                     |
| <b>Results – Recruitment</b>                                                                                                                                                                                                                                                                                           |                                                          |                                                                                                                                                                                                                                                                                                                                                                                                                                                                                                                     |
| Reported on dates defining the periods of recruitment                                                                                                                                                                                                                                                                  | Yes/no                                                   |                                                                                                                                                                                                                                                                                                                                                                                                                                                                                                                     |
| Reported on dates defining the periods of follow up                                                                                                                                                                                                                                                                    | Yes/no                                                   |                                                                                                                                                                                                                                                                                                                                                                                                                                                                                                                     |
| Reported the pilot trial ended/stopped                                                                                                                                                                                                                                                                                 | Yes/no                                                   |                                                                                                                                                                                                                                                                                                                                                                                                                                                                                                                     |
| <b>Results – Baseline data</b>                                                                                                                                                                                                                                                                                         |                                                          |                                                                                                                                                                                                                                                                                                                                                                                                                                                                                                                     |
| Reported a table showing baseline characteristics for the individual level<br>If yes, by group                                                                                                                                                                                                                         | Yes/no<br>Yes/no                                         |                                                                                                                                                                                                                                                                                                                                                                                                                                                                                                                     |
| Reported a table showing baseline characteristics for the cluster level<br>If yes, by group                                                                                                                                                                                                                            | Yes/no<br>Yes/no                                         |                                                                                                                                                                                                                                                                                                                                                                                                                                                                                                                     |
| <b>Results – Outcomes and estimation</b>                                                                                                                                                                                                                                                                               |                                                          |                                                                                                                                                                                                                                                                                                                                                                                                                                                                                                                     |
| Reported results for main feasibility objective (quantitative or qualitative)                                                                                                                                                                                                                                          | Yes/no                                                   |                                                                                                                                                                                                                                                                                                                                                                                                                                                                                                                     |
| <b>Results – Harms</b>                                                                                                                                                                                                                                                                                                 |                                                          |                                                                                                                                                                                                                                                                                                                                                                                                                                                                                                                     |
| Reported on harms or unintended effects                                                                                                                                                                                                                                                                                | Yes/no                                                   | Tick yes even if reported that there were no harms                                                                                                                                                                                                                                                                                                                                                                                                                                                                  |
| Reported other unintended consequences                                                                                                                                                                                                                                                                                 | Yes/no                                                   | An unintended consequence would be an unexpected result/finding that was not one of the objectives to explore and where the result would have consequences on the future definitive trial, such as a change in design/population etc.                                                                                                                                                                                                                                                                               |
| <b>Discussion</b>                                                                                                                                                                                                                                                                                                      |                                                          |                                                                                                                                                                                                                                                                                                                                                                                                                                                                                                                     |
| Reported limitations of pilot trial                                                                                                                                                                                                                                                                                    | Yes/no                                                   |                                                                                                                                                                                                                                                                                                                                                                                                                                                                                                                     |
| Reported sources of potential bias                                                                                                                                                                                                                                                                                     | Yes/no                                                   |                                                                                                                                                                                                                                                                                                                                                                                                                                                                                                                     |
| Reported remaining uncertainty                                                                                                                                                                                                                                                                                         | Yes/no                                                   |                                                                                                                                                                                                                                                                                                                                                                                                                                                                                                                     |
| Reported generalisability of pilot trial methods/findings to future definitive trial or other studies                                                                                                                                                                                                                  | Yes/no                                                   | To be reporting on the generalisability of the pilot trial methods/findings to the future definitive trial, we deemed it sufficient for the paper to be discussing whether the methods/findings of the pilot study can be applied to the future definitive trial. To be reporting on the generalisability of the pilot trial methods/findings to other future trials, we deemed it sufficient for the paper to be discussing whether the methods/findings of the pilot study can be applied to other future trials. |
| Interpretation of feasibility consistent with main feasibility objectives and findings                                                                                                                                                                                                                                 | Yes/no                                                   |                                                                                                                                                                                                                                                                                                                                                                                                                                                                                                                     |

|                                                                                                                            |                                                                                                                             |  |
|----------------------------------------------------------------------------------------------------------------------------|-----------------------------------------------------------------------------------------------------------------------------|--|
| Reported implications for progression from the pilot to the future definitive trial<br>If yes, what were the implications? | Yes/no<br><br>Proceed/<br>proceed with<br>changes/<br>Further<br>research or<br>piloting needed<br>first/ Don't go<br>ahead |  |
| Other information                                                                                                          |                                                                                                                             |  |
| Reported registration number for pilot trial                                                                               | Yes/no                                                                                                                      |  |
| Reported name of registry for pilot trial                                                                                  | Yes/no                                                                                                                      |  |
| Reported where the pilot trial protocol can be accessed                                                                    | Yes/no                                                                                                                      |  |
| Reported source of funding                                                                                                 | Yes/no                                                                                                                      |  |
| Reported ethical approval/research review committee approval<br>If yes, reported reference number                          | Yes/no<br>Yes/no                                                                                                            |  |
