# Supplementary material for: Quality of reporting of pilot and feasibility cluster randomised trials: a systematic review
Source: PubMed Central journal article supplement — BMJ Open. 2017 Nov 8;7(11):e016970. doi: 10.1136/bmjopen-2017-016970 (PMC5695336; doi:10.1136/bmjopen-2017-016970), 2017-11-08
Supplement: bmjopen-2017-016970supp003.pdf [file bmjopen-2017-016970supp003.pdf]

### Appendix 3: List of studies included in this systematic review

(Note that the publication years given in the list below are the print publication years, rather than the earlier of the print or electronic publication year, so there is some discrepancy between the list below and Table 1)

1. Begh RA, Aveyard P, Upton P, Bhopal RS, White M, Amos A, et al. Promoting smoking cessation in Pakistani and Bangladeshi men in the UK: pilot cluster randomised controlled trial of trained community outreach workers. *Trials*. 2011;12:197.
2. Jones RA, Riethmuller A, Hesketh K, Trezise J, Batterham M, Okely AD. Promoting fundamental movement skill development and physical activity in early childhood settings: a cluster randomized controlled trial. *Pediatr Exerc Sci*. 2011;23(4):600-15.
3. Legare F, Labrecque M, LeBlanc A, Njoya M, Laurier C, Cote L, et al. Training family physicians in shared decision making for the use of antibiotics for acute respiratory infections: a pilot clustered randomized controlled trial. *Health Expect*. 2011;14 Suppl 1:96-110.
4. Hopkins JM, Glenn BA, Cole BL, McCarthy W, Yancey A. Implementing organizational physical activity and healthy eating strategies on paid time: process evaluation of the UCLA WORKING pilot study. *Health Educ Res*. 2012;27(3):385-98.
5. Jago R, Sebire SJ, Cooper AR, Haase AM, Powell J, Davis L, et al. Bristol girls dance project feasibility trial: outcome and process evaluation results. *Int J Behav Nutr Phys Act*. 2012;9:83.
6. Taylor WJ, Brown M, William L, McPherson KM, Reed K, Dean SG, et al. A pilot cluster randomized controlled trial of structured goal-setting following stroke. *Clin Rehabil*. 2012;26(4):327-38.
7. Drahota AK, Ward D, Udell JE, Soilemezi D, Ogollah R, Higgins B, et al. Pilot cluster randomised controlled trial of flooring to reduce injuries from falls in wards for older people. *Age Ageing*. 2013;42(5):633-40.
8. Frenn M, Pruszynski JE, Felzer H, Zhang J. Authoritative feeding behaviors to reduce child BMI through online interventions. *J Spec Pediatr Nurs*. 2013;18(1):65-77.
9. Gifford WA, Davies BL, Graham ID, Tourangeau A, Woodend AK, Lefebvre N. Developing leadership capacity for guideline use: a pilot cluster randomized control trial. *Worldviews Evid Based Nurs*. 2013;10(1):51-65.
10. Jones RB, Goldsmith L, Hewson P, Williams CJ. Recruitment to online therapies for depression: pilot cluster randomized controlled trial. *J Med Internet Res*. 2013;15(3):e45.
11. Moore GF, Williams A, Moore L, Murphy S. An exploratory cluster randomised trial of a university halls of residence based social norms marketing campaign to reduce alcohol consumption among 1st year students. *Subst Abuse Treat Prev Policy*. 2013;8:15.
12. Pai M, Lloyd NS, Cheng J, Thabane L, Spencer FA, Cook DJ, et al. Strategies to enhance venous thromboprophylaxis in hospitalized medical patients (SENTRY): a pilot cluster randomized trial. *Implement Sci*. 2013;8:1.
13. Reeves R, West E, Barron D. Facilitated patient experience feedback can improve nursing care: a pilot study for a phase III cluster randomised controlled trial. *BMC Health Serv Res*. 2013;13:259.
14. Teut M, Schnabel K, Baur R, Kerckhoff A, Reese F, Pilgram N, et al. Effects and feasibility of an Integrative Medicine program for geriatric patients-a cluster-randomized pilot study. *Clin Interv Aging*. 2013;8:953-61.
15. Jago R, Sebire SJ, Davies B, Wood L, Edwards MJ, Banfield K, et al. Randomised feasibility trial of a teaching assistant led extracurricular physical activity intervention for 9 to 11 year olds: Action 3:30. *Int J Behav Nutr Phys Act*. 2014;11:114.
16. Michie L, Cameron ST, Glasier A, Larke N, Muir A, Lorimer A. Pharmacy-based interventions for initiating effective contraception following the use of emergency contraception: a pilot study. *Contraception*. 2014;90(4):447-53.

17. Mytton J, Ingram J, Manns S, Stevens T, Mulvaney C, Blair P, et al. The feasibility of using a parenting programme for the prevention of unintentional home injuries in the under-fives: a cluster randomised controlled trial. *Health Technol Assess.* 2014;18(3):1-184.
18. Thomas LH, Watkins CL, Sutton CJ, Forshaw D, Leathley MJ, French B, et al. Identifying continence options after stroke (ICONS): a cluster randomised controlled feasibility trial. *Trials.* 2014;15:509.
